# Supplementary material for: Asymmetric phase-transfer catalysed β-addition of isoxazolidin-5-ones to MBH carbonates
Source: Royal Society of Chemistry journal article supplement (doi:10.1039/c8qo01057a), 2018-01-01
Supplement: c8qo01057a1.pdf [file c8qo01057a1.pdf]

## SUPPORTING INFORMATION

# Asymmetric phase-transfer catalysed $\beta$ -addition of isoxazolidin-5-ones to MBH carbonates

Vito Capaccio,<sup>a,b</sup> Katharina Zielke,<sup>a</sup> Andreas Eitzinger,<sup>a</sup> Antonio Massa,<sup>b</sup> Laura Palombi,<sup>b</sup>  
Kirill Faust,<sup>c</sup> and Mario Waser<sup>\*a</sup>

*a) Institute of Organic Chemistry, Johannes Kepler University Linz, Altenbergerstraße 69, 4040 Linz, Austria. Fax: +43 732 2468 8747; Tel: +43 732 2468 8748; E-mail: [Mario.waser@jku.at](mailto:Mario.waser@jku.at)*

*b) Dipartimento di Chimica e Biologia "A. Zambelli", Università di Salerno, Via Giovanni Paolo II, 102, 84084, Fisciano, ITALY.*

*c) Institute of Catalysis, Johannes Kepler University Linz, Altenbergerstraße 69, 4040 Linz, Austria.*

### Table of contents

|                                                                                                                                                        |    |
|--------------------------------------------------------------------------------------------------------------------------------------------------------|----|
| 1. Experimental.....                                                                                                                                   | 2  |
| 1.1 General information .....                                                                                                                          | 2  |
| 1.2 Experimental procedures and compounds characterization.....                                                                                        | 3  |
| 1.2.1 General procedure for the synthesis of racemic compounds 5: .....                                                                                | 3  |
| 1.2.2 General procedure A for the asymmetric $\beta$ -addition of isoxazolidin-5-ones to MBH carbonates to obtain enantioenriched products 5a-w: ..... | 3  |
| 1.2.3 General procedure for the synthesis of benzyl-substituted isoxazolidin-5-one 2a-k: .....                                                         | 14 |
| 1.2.4 Preparation of Morita-Baylis-Hillman Carbonates 3a-m: .....                                                                                      | 17 |
| 2. Copies of NMR-Spectra .....                                                                                                                         | 20 |
| 3. Copies of HPLC Chromatograms .....                                                                                                                  | 44 |
| 4. X-Ray Analysis of 5f.....                                                                                                                           | 90 |

# 1. Experimental

## 1.1 General information

<sup>1</sup>H- and <sup>13</sup>C-NMR spectra were recorded on a Bruker Avance III 300 MHz spectrometer with a broad band observe probe, a Bruker Avance III HD 600 and a Bruker Avance-400 at room temperature. All NMR spectra were referenced to residual CHCl<sub>3</sub> (7.26 ppm, <sup>1</sup>H; 77.00 ppm, <sup>13</sup>C). The following abbreviations are used to indicate the multiplicity in NMR spectra: s = singlet; d = doublet; t = triplet; q = quartet; dd = double doublet; ddd = double doublet of doublet; m = multiplet; bs = broad signal.

Optical rotation of compounds was performed on a Jasco P-2000 digital polarimeter and a Schmidt + Haensch Polarimeter Model UniPol L 1000.

High resolution mass spectra (HRMS) were acquired using a Bruker solariX XR Fourier transform ion cyclotron resonance mass spectrometer (Bruker Daltonik GmbH, Bremen, Germany) equipped with a 7 T refrigerated actively-shielded superconducting magnet. The samples were ionized in positive ion mode using a MALDI ion source.

FTIR spectra were recorded as thin films on KBr plates using Bruker Tensor 27 spectrometer.

HPLC analyses were performed using a Waters-Breeze 2487, UV dual λ absorbance detector and 1525 Binary HPLC Pump and a Thermo Scientific Dionex Ultimate 3000 system with diode array detector, using a Chiralpak AD-H (250 x 4.6 mm, 5 μm), IC (250 x 4.6 mm, 5 μm), IA-3 (250 x 4.6 mm, 5 μm) or a YMC Cellulose-SB (250 x 4.6 mm, 5 μm) chiral stationary phase.

All chemicals were purchased from commercial suppliers and used without further purification. All reactions were performed under an Ar atmosphere.

Catalysts **A1-2**, **B**, **C**, **D1-3** were either commercial or prepared as described previously.<sup>1,2,3,4</sup>

---

<sup>1</sup> M .Parvez, N. Haraguchi, S. Itsuno, *Macromolecules*, **2014**, 47, 1922–1928.

<sup>2</sup> P .Nun, V. Pérez, M. Calmès, J. Martinez, F. Lamaty, *Chem. Eur. J.*, **2012**, 18, 3773-3779.

<sup>3</sup> M. Tiffner, J. Novacek, A. Busillo, K. Gratzner, A. Massa, M. Waser, *RSC Adv.*, **2015**, 5, 78941.

<sup>4</sup> M.Waser, K. Gratzner, R. Herchl, N. Müller, *Org. Biomol. Chem.*, **2012**, 10, 251.

## 1.2 Experimental procedures and compounds characterization

### 1.2.1 General procedure for the synthesis of racemic compounds **5**:

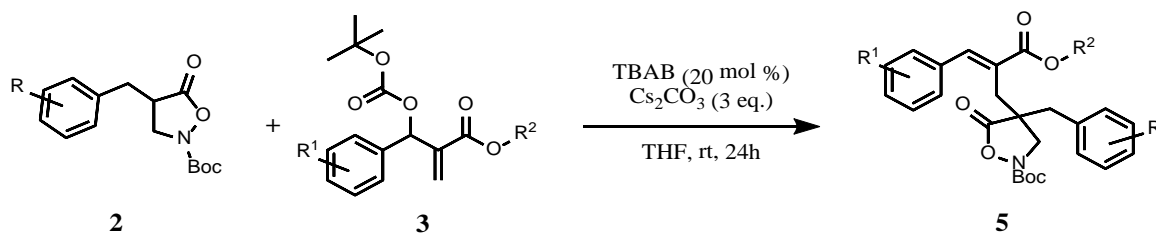

In a Schlenk tube, under argon atmosphere, the Baylis-Hillman carbonate **3** (1.5 eq., 0.15 mmol), benzyl-substituted isoxazolidin-5-one **2** (1.0 eq., 0.10 mmol) and tetrabutylammonium bromide (0.20 eq., 0.020 mmol, 6.4 mg) were dissolved in THF (2 ml). Then, Cs<sub>2</sub>CO<sub>3</sub> (3.0 eq., 0.30 mmol, 98 mg) was added and the resulting heterogeneous solution was stirred (1000 rpm) at room temperature for 24 h. Then, the mixture was filtered over a pad of Na<sub>2</sub>SO<sub>4</sub>, the solvent evaporated and the residue dried in vacuo. The resulting crude product was purified by chromatography (silica gel, heptane-ethyl acetate, 15/1 to 10/1) to afford racemic products **5**.

### 1.2.2 General procedure A for the asymmetric $\beta$ -addition of isoxazolidin-5-ones to MBH carbonates to obtain enantioenriched products **5a-w**:

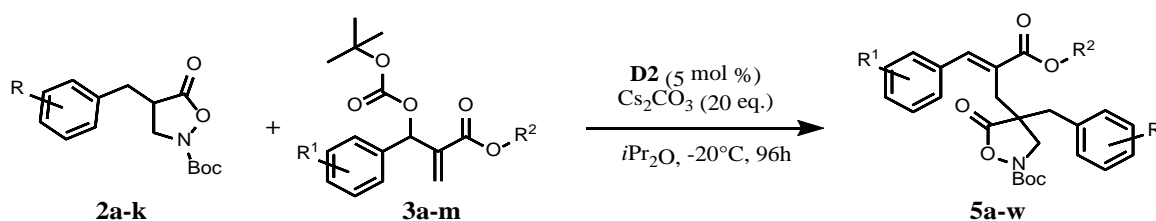

In a Schlenk tube, under argon atmosphere, the Baylis-Hillman carbonate **3a-m** (1.5 eq., 0.15 mmol), benzyl-substituted isoxazolidin-5-one **2a-k** (1.0 eq., 0.10 mmol) and catalyst **D2** (0.05 eq., 0.005 mmol, 5.4 mg) were charged and dissolved in 2.0 ml of isopropyl ether, and the mixture cooled at -20°C. After 20 minutes, Cs<sub>2</sub>CO<sub>3</sub> (3.0 eq., 0.30 mmol, 97.7 mg) was quickly added and the mixture was stirred (1000 rpm) for 96 h. Then, the mixture was filtered over a pad of Na<sub>2</sub>SO<sub>4</sub>, washed with DCM, the solvent evaporated, and the residue dried in vacuo. The resulting crude product was purified by chromatography (silica gel, heptane-ethyl acetate, 15/1 to 10/1) to afford enantioenriched products **5a-w**.

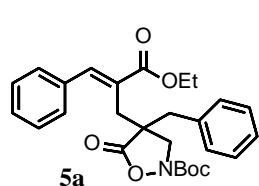

**tert-butyl (E)-4-benzyl-4-(2-(ethoxycarbonyl)-3-phenylallyl)-5-oxoisoxazolidine-2-carboxylate (5a)**: Following the general procedure A with tert-butyl 4-benzyl-5-oxoisoxazolidine-2-carboxylate **2a** (27.7 mg, 0.10 mmol, 1.0 eq.) and ethyl 2-(((tert-butoxycarbonyl)oxy)(phenyl)methyl)acrylate **3a** (46.0 mg, 0.15 mmol, 1.5 eq.), the title compound **5a** was obtained as a colorless oil (41.9 mg, 90%, E/Z= 10:1, e.r.= 94:6 (major diastereomer)).  $[\alpha]_D^{25} = 43.9^\circ$  (c = 0.41, CHCl<sub>3</sub>). <sup>1</sup>H NMR (300 MHz, Chloroform-d, 298 K)

$\delta$  7.83 (s, 1H), 7.30 – 7.06 (m, 8H), 7.04 – 6.94 (m, 2H), 4.21 (q,  $J = 7.1$  Hz, 2H), 3.82 – 3.70 (m, 2H), 3.06 (s, 2H), 2.96 (d,  $J = 13.9$  Hz, 1H), 2.58 (d,  $J = 13.9$  Hz, 1H), 1.40 (s, 9H), 1.28 (t,  $J = 7.1$  Hz, 3H) ppm;  $^{13}\text{C}$  NMR (75 MHz, Chloroform-d, 298 K)  $\delta$  175.5, 167.7, 154.9, 143.5, 134.9, 134.9, 130.4, 128.9, 128.8, 128.7, 128.7, 128.0, 127.4, 83.6, 61.4, 54.4, 49.8, 40.8, 31.7, 28.1, 14.1 ppm; **IR** (film):  $\nu$  (cm<sup>-1</sup>) 2977, 2938, 1794, 1712, 1454, 1369, 1254, 1202, 1146, 1095, 1022, 848, 754, 701; **HRMS (MALDI-FT ICR)**:  $m/z$  calcd for C<sub>27</sub>H<sub>31</sub>NNaO<sub>6</sub> [M+Na]<sup>+</sup> = 488.20456, found: 488.20359; The enantioselectivity was determined by **HPLC** (Chiralpak AD-H column, n-hexane:i-PrOH = 95:5, 0.5 mL/min, 10 °C,  $t_{\text{major}}$  = 46.8 min,  $t_{\text{minor}}$  = 61.4 min).

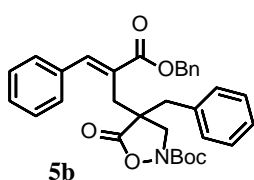

**tert-butyl (E)-4-benzyl-4-(2-((benzyloxy)carbonyl)-3-phenylallyl)-5-oxoisoxazolidine-2-carboxylate (5b)**: Following the general procedure A with tert-butyl 4-benzyl-5-oxoisoxazolidine-2-carboxylate **2a** (27.7 mg, 0.10 mmol, 1.0 eq.) and benzyl 2-(((tert-butoxycarbonyl)oxy)(phenyl)methyl)acrylate **3b** (55.2 mg, 0.15 mmol, 1.5 eq.), the title compound **5b** was obtained as a colorless oil (35.9 mg, 68%, E/Z = 8:1, e.r. = 78:22 (major diastereomer)).

$[\alpha]_D^{25} = 22.3^\circ$  ( $c = 0.22$ , CHCl<sub>3</sub>). **<sup>1</sup>H NMR** (300 MHz, Chloroform-d, 298 K)  $\delta$  7.85 (s, 1H), 7.46 – 7.04 (m, 13H), 7.04 – 6.89 (m, 2H), 5.22 (d,  $J = 12.3$  Hz, 1H), 5.15 (d,  $J = 12.3$  Hz, 1H), 3.79 (d,  $J = 11.1$  Hz, 1H), 3.73 (d,  $J = 11.1$  Hz, 1H), 3.08 (s, 2H), 2.95 (d,  $J = 13.9$  Hz, 1H), 2.57 (d,  $J = 13.9$  Hz, 1H), 1.38 (s, 9H) ppm;  $^{13}\text{C}$  NMR (75 MHz, Chloroform-d, 298 K)  $\delta$  175.4, 167.6, 154.9, 143.8, 135.8, 134.8, 134.8, 130.4, 128.9, 128.8, 128.7, 128.6, 128.6, 128.3, 127.8, 127.4, 83.6, 67.1, 54.5, 49.9, 40.7, 31.8, 28.1 ppm; **IR** (film):  $\nu$  (cm<sup>-1</sup>) 2920, 2852, 1794, 1713, 1633, 1497, 1456, 1369, 1253, 1146, 1030, 848, 753, 700; **HRMS (MALDI-FT ICR)**:  $m/z$  calcd for C<sub>32</sub>H<sub>33</sub>NNaO<sub>6</sub> [M+Na]<sup>+</sup> = 550.22001, found: 550.21909; The enantioselectivity was determined by **HPLC** (YMC Cellulose-SB column, n-hexane:i-PrOH = 80:20, 0.5 mL/min, 10 °C,  $t_{\text{minor}}$  = 21.1 min,  $t_{\text{major}}$  = 26.7 min).

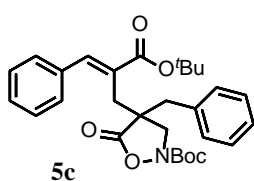

**tert-butyl (E)-4-benzyl-4-(2-(tert-butoxycarbonyl)-3-phenylallyl)-5-oxoisoxazolidine-2-carboxylate (5c)**: Following the general procedure A with tert-butyl 4-benzyl-5-oxoisoxazolidine-2-carboxylate **2a** (27.7 mg, 0.10 mmol, 1.0 eq.) and tert-butyl 2-(((tert-butoxycarbonyl)oxy)(phenyl)methyl)acrylate **3c** (50.2 mg, 0.15 mmol, 1.5 eq.), the title compound **5c** was obtained as a colorless oil (26.2 mg, 53%, E/Z = 8:1, e.r. = 91:9 (major diastereomer)).

$[\alpha]_D^{24} = 33.0^\circ$  ( $c = 1.00$ , CHCl<sub>3</sub>). **<sup>1</sup>H NMR** (300 MHz, Chloroform-d, 298 K)  $\delta$  7.82 (s, 1H), 7.40 – 7.14 (m, 8H), 7.10 – 7.00 (m, 2H), 3.83 (d,  $J = 10.9$  Hz, 1H), 3.76 (d,  $J = 10.9$  Hz, 1H), 3.11 (s, 2H), 3.02 (d,  $J = 13.9$  Hz, 1H), 2.63 (d,  $J = 13.9$  Hz, 1H), 1.54 (s, 9H), 1.46 (s, 9H) ppm;  $^{13}\text{C}$  NMR (75 MHz, Chloroform-d, 298 K)  $\delta$  175.2, 166.8, 154.9, 142.5, 135.3, 135.0, 130.4, 129.5, 128.8, 128.7, 128.7, 128.4, 127.4, 83.6, 81.9, 54.6, 50.0, 40.7, 31.5, 28.1, 28.0 ppm; **IR** (film):  $\nu$  (cm<sup>-1</sup>) 2976, 2933, 1798, 1711, 1495, 1477, 1455, 1394, 1369, 1255, 1147, 1017, 850, 758, 701; **HRMS (MALDI-FT ICR)**:  $m/z$  calcd for C<sub>29</sub>H<sub>35</sub>NNaO<sub>6</sub> [M+Na]<sup>+</sup> = 516.23566, found: 516.23499; The enantioselectivity was determined by **HPLC** (Chiralpak IA-3 column, n-hexane:i-PrOH = 80:20, 0.8 mL/min,  $t_{\text{major}}$  = 6.4 min,  $t_{\text{minor}}$  = 8.6 min).

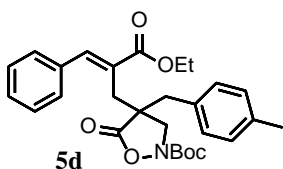

**tert-butyl (E)-4-(2-(ethoxycarbonyl)-3-phenylallyl)-4-(4-methylbenzyl)-5-oxoisoxazolidine-2-carboxylate (5d):** Following the general procedure A with tert-butyl 4-(4-methylbenzyl)-5-oxoisoxazolidine-2-carboxylate **2b** (29.1 mg, 0.10 mmol, 1.0 eq.) and ethyl 2-(((tert-butoxycarbonyl)oxy)(phenyl)methyl)acrylate **3a** (46.0 mg, 0.15 mmol, 1.5

eq.), the title compound **5d** was obtained as a colorless oil (44.1 mg, 92%, E/Z= 8:1, e.r.= 92:8 (major diastereomer)).  $[\alpha]_D^{25} = 30.9^\circ$  ( $c = 0.80$ ,  $\text{CHCl}_3$ ).  $^1\text{H NMR}$  (300 MHz, Chloroform- $d$ , 298 K)  $\delta$  7.82 (s, 1H), 7.30 – 7.15 (m, 3H), 7.14 – 7.06 (m, 2H), 6.97 (d,  $J = 7.8$  Hz, 2H), 6.87 (d,  $J = 7.8$  Hz, 2H), 4.20 (q,  $J = 7.2$  Hz, 2H), 3.76 (s, 2H), 3.04 (s, 2H), 2.91 (d,  $J = 14.0$  Hz, 1H), 2.54 (d,  $J = 14.0$  Hz, 1H), 2.24 (s, 3H), 1.39 (s, 9H), 1.28 (d,  $J = 7.2$  Hz, 3H) ppm;  $^{13}\text{C NMR}$  (75 MHz, Chloroform- $d$ , 298 K)  $\delta$  175.7, 167.7, 154.9, 143.5, 137.0, 134.9, 131.7, 130.2, 129.4, 128.9, 128.7, 128.6, 128.0, 83.6, 61.4, 54.4, 49.8, 40.5, 31.7, 28.1, 21.0, 14.1 ppm; **IR** (film):  $\nu$  ( $\text{cm}^{-1}$ ) 2978, 2937, 1197, 1715, 1629, 1446, 1369, 1254, 1202, 1147, 1023, 848, 813, 763, 700; **HRMS (MALDI-FT ICR):**  $m/z$  calcd for  $\text{C}_{28}\text{H}_{33}\text{NNaO}_6$   $[\text{M}+\text{Na}]^+ = 502.22001$ , found: 502.21955; The enantioselectivity was determined by **HPLC** (Chiralpak AD-H column, n-hexane:i-PrOH = 80:20, 0.5 mL/min,  $t_{\text{major}} = 11.9$  min,  $t_{\text{minor}} = 16.0$  min).

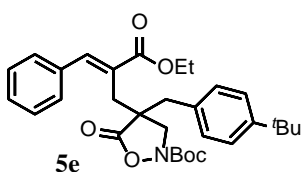

**tert-butyl (E)-4-(4-(tert-butyl)benzyl)-4-(2-(ethoxycarbonyl)-3-phenylallyl)-5-oxoisoxazolidine-2-carboxylate (5e):** Following the general procedure A with tert-butyl 4-(4-(tert-butyl)benzyl)-5-oxoisoxazolidine-2-carboxylate **2c** (33.3 mg, 0.10 mmol, 1.0 eq.) and ethyl 2-(((tert-butoxycarbonyl)oxy)(phenyl)methyl)acrylate **3a** (46.0 mg,

0.15 mmol, 1.5 eq.), the title compound **5e** was obtained as a colorless oil (40.2 mg, 77%, E/Z= 11:1, e.r.= 95:5 (major diastereomer)).  $[\alpha]_D^{24} = 41.8^\circ$  ( $c = 1.00$ ,  $\text{CHCl}_3$ ).  $^1\text{H NMR}$  (300 MHz, Chloroform- $d$ , 298 K)  $\delta$  7.82 (s, 1H), 7.25 – 7.16 (m, 5H), 7.16 – 7.09 (m, 2H), 6.92 (d,  $J = 7.9$  Hz, 2H), 4.20 (d,  $J = 7.2$  Hz, 2H), 3.77 (s, 2H), 3.06 (s, 2H), 2.91 (d,  $J = 14.0$  Hz, 1H), 2.54 (d,  $J = 14.0$  Hz, 1H), 1.41 (s, 9H), 1.27 (t,  $J = 7.2$  Hz, 3H), 1.22 (s, 9H) ppm;  $^{13}\text{C NMR}$  (75 MHz, Chloroform- $d$ , 298 K)  $\delta$  175.6, 167.7, 155.0, 150.2, 143.5, 135.0, 131.7, 130.2, 129.0, 128.7, 128.6, 128.0, 125.6, 83.6, 61.4, 54.4, 49.7, 40.2, 34.4, 31.6, 31.3, 28.1, 14.1 ppm; **IR** (film):  $\nu$  ( $\text{cm}^{-1}$ ) 2968, 2869, 1797, 1745, 1714, 1629, 1494, 1477, 1394, 1446, 1369, 1318, 1254, 1202, 1147, 1099, 1020, 850, 757, 701; **HRMS (MALDI-FT ICR):**  $m/z$  calcd for  $\text{C}_{31}\text{H}_{39}\text{NNaO}_6$   $[\text{M}+\text{Na}]^+ = 544.26696$ , found: 544.26614; The enantioselectivity was determined by **HPLC** (Chiralpak IC column, n-hexane:i-PrOH = 80:20, 1.0 mL/min,  $t_{\text{minor}} = 11.0$  min,  $t_{\text{major}} = 17.7$  min).

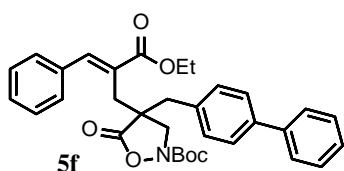

**tert-butyl (E)-4-([1,1'-biphenyl]-4-ylmethyl)-4-(2-(ethoxycarbonyl)-3-phenylallyl)-5-oxoisoxazolidine-2-carboxylate (5f):** Following the general procedure A with tert-butyl 4-([1,1'-biphenyl]-4-ylmethyl)-5-oxoisoxazolidine-2-carboxylate **2d** (35.3 mg, 0.10 mmol, 1.0 eq.) and ethyl 2-(((tert-butoxycarbonyl)oxy)(phenyl)methyl)acrylate **3a** (46.0

mg, 0.15 mmol, 1.5 eq.), the title compound **5f** was obtained as a colorless oil (40.1 mg, 74%, E/Z= 9:1, e.r.= 92:8 (major diastereomer)).  $[\alpha]_D^{25} = 19.8^\circ$  ( $c = 0.36$ ,  $\text{CHCl}_3$ ).  $^1\text{H NMR}$  (300 MHz, Chloroform- $d$ , 298 K)  $\delta$  7.91 (s, 1H), 7.56 (d,  $J = 7.8$  Hz, 2H), 7.50 – 7.41 (m, 4H), 7.39 – 7.34 (m, 1H), 7.31 – 7.23 (m, 3H), 7.19 (s, 2H), 7.14 (d,  $J = 7.8$  Hz, 2H), 4.29 (q,  $J = 7.1$  Hz, 2H), 3.88 (s, 2H), 3.16 (s, 2H), 3.06 (d,  $J = 13.9$  Hz, 1H), 2.71 (d,  $J = 13.9$  Hz, 1H), 1.47 (s, 9H), 1.36 (t,  $J = 7.1$  Hz, 3H) ppm;  $^{13}\text{C NMR}$  (75 MHz, Chloroform- $d$ , 298 K)  $\delta$  175.6, 167.7, 155.0, 143.6, 140.5,

140.3, 134.9, 133.9, 130.8, 128.8, 128.8, 128.6, 128.0, 127.4, 127.4, 127.0, 83.7, 61.5, 54.4, 49.8, 40.5, 31.6, 28.1, 14.1 ppm; **IR** (film):  $\nu$  (cm<sup>-1</sup>) 2979, 2935, 1796, 1713, 1636, 1488, 1447, 1369, 1253, 1202, 1149, 1008, 848, 754, 698; **HRMS (MALDI-FT ICR)**:  $m/z$  calcd for C<sub>33</sub>H<sub>35</sub>NNaO<sub>6</sub> [M+Na]<sup>+</sup> = 564.23566, found: 564.23488; The enantioselectivity was determined by **HPLC** (YMC Cellulose-SB column, n-hexane:i-PrOH = 80:20, 0.5 mL/min,  $t_{\text{minor}}$  = 25.5 min,  $t_{\text{major}}$  = 29.1 min).

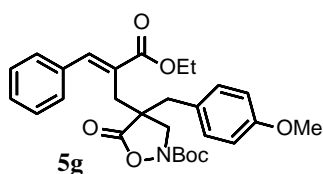

**tert-butyl (E)-4-(2-(ethoxycarbonyl)-3-phenylallyl)-4-(4-methoxybenzyl)-5-oxoisoxazolidine-2-carboxylate (5g)**: Following the general procedure A with tert-butyl 4-(4-methoxybenzyl)-5-oxoisoxazolidine-2-carboxylate **2e** (30.7 mg, 0.10 mmol, 1.0 eq.) and ethyl 2-(((tert-butoxycarbonyl)oxy)(phenyl)methyl)acrylate **3a** (46.0 mg,

0.15 mmol, 1.5 eq.), the title compound **5g** was obtained as a colorless oil (38.1 mg, 77%, E/Z = 10:1, e.r. = 93:7 (major diastereomer)).  $[\alpha]_D^{25}$  = 23.1° (c = 0.30, CHCl<sub>3</sub>). **<sup>1</sup>H NMR** (300 MHz, Chloroform-d, 298 K)  $\delta$  7.89 (s, 1H), 7.35 – 7.27 (m, 3H), 7.21 – 7.14 (m, 2H), 6.98 (d, J = 8.2 Hz, 2H), 6.77 (d, J = 8.2 Hz, 2H), 4.28 (q, J = 7.1 Hz, 2H), 3.83 (s, 2H), 3.78 (s, 3H), 3.11 (s, 2H), 2.97 (d, J = 14.1 Hz, 1H), 2.59 (d, J = 14.1 Hz, 1H), 1.46 (s, 9H), 1.35 (t, J = 7.1 Hz, 3H) ppm; **<sup>13</sup>C NMR** (75 MHz, Chloroform-d, 298 K)  $\delta$  175.7, 167.7, 158.9, 154.9, 143.5, 143.4, 134.9, 131.4, 128.9, 128.7, 128.6, 128.0, 126.7, 114.1, 83.6, 61.4, 55.2, 54.3, 49.9, 40.1, 31.7, 28.1, 14.1 ppm; **IR** (film):  $\nu$  (cm<sup>-1</sup>) 2979, 2930, 1797, 1715, 1612, 1514, 1458, 1369, 1303, 1252, 1202, 1181, 1146, 1034, 847, 763, 700; **HRMS (MALDI-FT ICR)**:  $m/z$  calcd for C<sub>28</sub>H<sub>33</sub>NNaO<sub>7</sub> [M+Na]<sup>+</sup> = 518.21492, found: 518.21471; The enantioselectivity was determined by **HPLC** (Chiralpak AD-H column, n-hexane:i-PrOH = 80:20, 0.5 mL/min, 10 °C,  $t_{\text{major}}$  = 23.0 min,  $t_{\text{minor}}$  = 31.3 min).

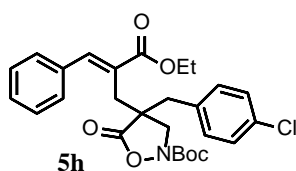

**tert-butyl (E)-4-(4-chlorobenzyl)-4-(2-(ethoxycarbonyl)-3-phenylallyl)-5-oxoisoxazolidine-2-carboxylate (5h)**: Following the general procedure A with tert-butyl 4-(4-chlorobenzyl)-5-oxoisoxazolidine-2-carboxylate **2f** (31.2 mg, 0.10 mmol, 1.0 eq.) and ethyl 2-(((tert-butoxycarbonyl)oxy)(phenyl)methyl)acrylate **3a** (46.0 mg, 0.15 mmol, 1.5

eq.), the title compound **5h** was obtained as a colorless oil (40.0 mg, 80%, E/Z = 6:1, e.r. = 88/12 (major diastereomer)).  $[\alpha]_D^{25}$  = 19.0° (c = 0.37, CHCl<sub>3</sub>). **<sup>1</sup>H NMR** (300 MHz, Chloroform-d, 298 K)  $\delta$  7.91 (s, 1H), 7.38 – 7.27 (m, 3H), 7.24 – 7.14 (m, 4H), 6.97 (d, J = 8.0 Hz, 2H), 4.28 (q, J = 7.1 Hz, 2H), 3.84 (d, J = 11.1 Hz, 1H), 3.76 (d, J = 11.1 Hz, 1H), 3.09 (s, 2H), 2.97 (d, J = 14.0 Hz, 1H), 2.61 (d, J = 14.0 Hz, 1H), 1.47 (s, 9H), 1.35 (t, J = 7.1 Hz, 3H) ppm; **<sup>13</sup>C NMR** (75 MHz, Chloroform-d, 298 K)  $\delta$  175.4, 167.6, 154.8, 143.7, 134.9, 133.5, 133.3, 131.6, 128.9, 128.8, 128.7, 128.7, 127.9, 83.8, 61.5, 54.4, 49.7, 40.1, 31.6, 28.1, 14.1 ppm; **IR** (film):  $\nu$  (cm<sup>-1</sup>) 2983, 2936, 1795, 1714, 1632, 1494, 1446, 1369, 1253, 1202, 1146, 1095, 1016, 847, 756, 701; **HRMS (MALDI-FT ICR)**:  $m/z$  calcd for C<sub>27</sub>H<sub>30</sub>ClKNNaO<sub>6</sub> [M+Na]<sup>+</sup> = 538.13932, found: 538.13875; The enantioselectivity was determined by **HPLC** (YMC Cellulose-SB column, n-hexane:i-PrOH = 90:10, 0.5 mL/min, 10 °C,  $t_{\text{minor}}$  = 22.7 min,  $t_{\text{major}}$  = 31.0 min).

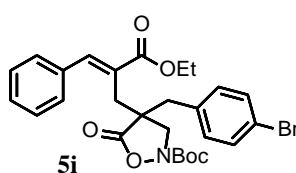

**tert-butyl (E)-4-(4-bromobenzyl)-4-(2-(ethoxycarbonyl)-3-phenylallyl)-5-oxoisoxazolidine-2-carboxylate (5i)**: Following the general procedure A with tert-butyl 4-(4-bromobenzyl)-5-oxoisoxazolidine-2-carboxylate **2g** (35.6 mg, 0.10 mmol, 1.0 eq.) and ethyl 2-(((tert-butoxycarbonyl)oxy)(phenyl)methyl)acrylate **3a** (46.0 mg, 0.15

mmol, 1.5 eq.), the title compound **5i** was obtained as a colorless oil (38.1 mg, 70%, E/Z = 10:1,

e.r.= 84:16 (major diastereomer)).  $[\alpha]_D^{24} = 24.4^\circ$  (c= 1.00, CHCl<sub>3</sub>). **<sup>1</sup>H NMR** (300 MHz, Chloroform-d, 298 K)  $\delta$  7.91 (s, 1H), 7.40 – 7.28 (m, 5H), 7.21 – 7.13 (m, 2H), 6.91 (d, J = 8.0 Hz, 2H), 4.28 (q, J = 7.1 Hz, 2H), 3.84 (d, J = 11.1 Hz, 1H), 3.76 (d, J = 11.1 Hz, 1H), 3.09 (s, 2H), 2.95 (d, J = 14.0 Hz, 1H), 2.60 (d, J = 14.0 Hz, 1H), 1.47 (s, 9H), 1.35 (t, J = 7.1 Hz, 3H) ppm; **<sup>13</sup>C NMR** (75 MHz, Chloroform-d, 298 K)  $\delta$  175.3, 167.6, 154.8, 143.7, 134.9, 133.8, 132.0, 131.8, 128.8, 128.7, 127.9, 121.7, 83.8, 61.5, 54.4, 49.6, 40.12, 31.6, 28.1, 14.1 ppm; **IR** (film):  $\nu$  (cm<sup>-1</sup>) 2980, 2937, 1795, 1712, 1490, 1369, 1253, 1146, 1074, 1012, 846, 755, 701; **HRMS (MALDI-FT ICR)**:  $m/z$  calcd for C<sub>27</sub>H<sub>30</sub>BrNNaO<sub>6</sub> [M+Na]<sup>+</sup> = 566.11487, found: 566.11407; The enantioselectivity was determined by **HPLC** (Chiralpak IC column, n-hexane:i-PrOH = 80:20, 1.0 mL/min,  $t_{\text{minor}}$  = 12.7 min,  $t_{\text{major}}$  = 24.8 min).

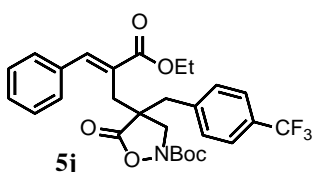

**tert-butyl (E)-4-(2-(ethoxycarbonyl)-3-phenylallyl)-5-oxo-4-(4-(trifluoromethyl)benzyl)isoxazolidine-2-carboxylate (5j)**: Following the general procedure A with tert-butyl 5-oxo-4-(4-(trifluoromethyl)benzyl)isoxazolidine-2-carboxylate **2h** (34.5 mg, 0.10 mmol, 1.0 eq.) and ethyl 2-(((tert-

butoxycarbonyl)oxy)(phenyl)methyl)acrylate **3a** (46.0 mg, 0.15 mmol, 1.5 eq.), the title compound **5j** was obtained as a colorless oil (43.8 mg, 82%, E/Z= 10:1, e.r.= 85:15 (major diastereomer)).  $[\alpha]_D^{26} = 25.2^\circ$  (c = 0.50, CHCl<sub>3</sub>). **<sup>1</sup>H NMR** (300 MHz, Chloroform-d, 298 K)  $\delta$  7.93 (s, 1H), 7.48 (d, J = 7.9 Hz, 2H), 7.34 – 7.27 (m, 3H), 7.23 – 7.11 (m, 4H), 4.28 (q, J = 7.1 Hz, 2H), 3.87 (d, J = 11.1 Hz, 1H), 3.74 (d, J = 11.1 Hz, 1H), 3.11 (s, 2H), 3.04 (d, J = 13.9 Hz, 1H), 2.70 (d, J = 13.9 Hz, 1H), 1.47 (s, 9H), 1.36 (t, J = 7.1 Hz, 3H) ppm; **<sup>13</sup>C NMR** (75 MHz, Chloroform-d, 298 K)  $\delta$  175.1, 167.5, 154.8, 143.8, 139.0, 134.9, 130.6, 129.7 (q, J= 32.6 Hz), 128.8, 128.7, 128.7, 127.8, 125.6 (q, J= 3.7 Hz), 124.0 (q, J= 272.0 Hz), 83.9, 61.5, 54.6, 49.7, 40.4, 31.6, 28.0, 14.1 ppm; **IR** (film):  $\nu$  (cm<sup>-1</sup>) 2919, 2849, 1798, 1714, 1634, 1447, 1370, 1326, 1255, 1203, 1163, 1125, 1068, 1019, 850, 764, 701; **HRMS (MALDI-FT ICR)**:  $m/z$  calcd for C<sub>28</sub>H<sub>30</sub>F<sub>3</sub>NNaO<sub>6</sub> [M+Na]<sup>+</sup> = 556.19174, found: 556.19087; The enantioselectivity was determined by **HPLC** (Chiralpak AD-H column, n-hexane:i-PrOH = 80:20, 0.5 mL/min,  $t_{\text{major}}$  = 14.3 min,  $t_{\text{minor}}$  = 25.6 min).

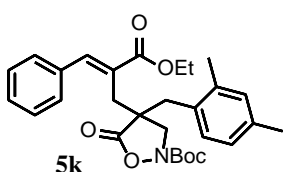

**tert-butyl (E)-4-(2,5-dimethylbenzyl)-4-(2-(ethoxycarbonyl)-3-phenylallyl)-5-oxoisoxazolidine-2-carboxylate (5k)**: Following the general procedure A with tert-butyl 4-(2,5-dimethylbenzyl)-5-oxoisoxazolidine-2-carboxylate **2i** (30.5 mg, 0.10 mmol, 1.0 eq.) and ethyl 2-(((tert-

butoxycarbonyl)oxy)(phenyl)methyl)acrylate **3a** (46.0 mg, 0.15 mmol, 1.5 eq.), the title compound **5k** was obtained as a colorless oil (32.1 mg, 65%, E/Z= 8:1, e.r.= 89:11 (major diastereomer)).  $[\alpha]_D^{24} = 66.9^\circ$  (c= 1.00, CHCl<sub>3</sub>). **<sup>1</sup>H NMR** (300 MHz, Chloroform-d, 298 K)  $\delta$  7.93 (s, 1H), 7.37 – 7.28 (m, 3H), 7.28 – 7.19 (m, 2H), 7.00 (d, J = 7.5 Hz, 1H), 6.94 (d, J = 8.0 Hz, 1H), 6.86 (s, 1H), 4.37 – 4.21 (m, 2H), 3.94 (d, J = 10.9 Hz, 1H), 3.56 (d, J = 10.9 Hz, 1H), 3.23 – 3.08 (m, 2H), 2.96 (d, J = 14.4 Hz, 1H), 2.73 (d, J = 14.4 Hz, 1H), 2.21 (s, 3H), 2.07 (s, 3H), 1.47 (s, 9H), 1.37 (t, J = 7.1 Hz, 3H) ppm; **<sup>13</sup>C NMR** (75 MHz, Chloroform-d, 298 K)  $\delta$  175.7, 167.6, 154.8, 143.5, 136.0, 135.1, 133.8, 133.6, 130.8, 130.6, 128.9, 128.8, 128.6, 128.3, 128.0, 83.6, 61.4, 54.2, 50.3, 36.3, 32.2, 28.1, 20.9, 19.5, 14.1 ppm; **IR** (film):  $\nu$  (cm<sup>-1</sup>) 2981, 2932, 1796, 1714, 1629, 1504, 1447, 1369, 1257, 1201, 1147, 1099, 1022, 848, 813, 755, 701; **HRMS (MALDI-FT ICR)**:  $m/z$  calcd for C<sub>29</sub>H<sub>35</sub>NNaO<sub>6</sub> [M+Na]<sup>+</sup> = 516.23566, found:

516.23513; The enantioselectivity was determined by **HPLC** (Chiralpak IC column, n-hexane:i-PrOH = 90:10, 0.5 mL/min,  $t_{\text{minor}} = 31.4$  min,  $t_{\text{major}} = 46.0$  min).

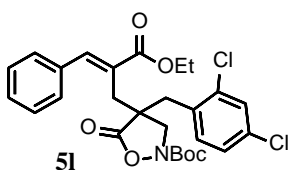

**tert-butyl (E)-4-(2,4-dichlorobenzyl)-4-(2-(ethoxycarbonyl)-3-phenylallyl)-5-oxoisoxazolidine-2-carboxylate (5l)**: Following the general procedure A with tert-butyl 4-(2,4-dichlorobenzyl)-5-oxoisoxazolidine-2-carboxylate **2j** (34.6 mg, 0.10 mmol, 1.0 eq.) and ethyl 2-(((tert-butoxycarbonyl)oxy)(phenyl)methyl)acrylate **3a** (46.0 mg, 0.15 mmol, 1.5 eq.), the title compound **5l** was obtained as a colorless oil (40.1 mg, 75%, E/Z = 9:1, e.r. = 84:16 (major diastereomer)).  $[\alpha]_D^{26} = 37.4^\circ$  (c = 0.80, CHCl<sub>3</sub>). **<sup>1</sup>H NMR** (300 MHz, Chloroform-d, 298 K)  $\delta$  7.96 (s, 1H), 7.45 – 7.27 (m, 6H), 7.12 (s, 2H), 4.29 (q, J = 7.2 Hz, 2H), 3.98 (d, J = 11.2 Hz, 1H), 3.55 (d, J = 11.2 Hz, 1H), 3.25 – 3.10 (m, 2H), 3.02 – 2.95 (m, 2H), 1.46 (s, 9H), 1.36 (d, J = 7.2 Hz, 3H) ppm; **<sup>13</sup>C NMR** (75 MHz, Chloroform-d, 298 K)  $\delta$  175.1, 167.5, 154.7, 143.8, 135.8, 135.0, 134.1, 132.6, 131.9, 129.5, 128.8, 128.8, 128.3, 127.8, 127.7, 83.8, 61.5, 54.4, 50.4, 36.0, 32.3, 28.0, 14.1 ppm; **IR** (film):  $\nu$  (cm<sup>-1</sup>) 2979, 1796, 1717, 1475, 1370, 1255, 1202, 1146, 1020, 849, 759, 700; **HRMS (MALDI-FT ICR)**:  $m/z$  calcd for C<sub>27</sub>H<sub>29</sub>Cl<sub>2</sub>NNaO<sub>6</sub> [M+Na]<sup>+</sup> = 556.12641, found: 556.12767; The enantioselectivity was determined by **HPLC** (Chiralpak AD-H column, n-hexane:i-PrOH = 80:20, 0.5 mL/min,  $t_{\text{minor}} = 13.7$  min,  $t_{\text{major}} = 15.8$  min).

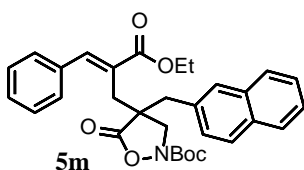

**tert-butyl (E)-4-(2-(ethoxycarbonyl)-3-phenylallyl)-4-(naphthalen-2-ylmethyl)-5-oxoisoxazolidine-2-carboxylate (5m)**: Following the general procedure A with tert-butyl 4-(naphthalen-2-ylmethyl)-5-oxoisoxazolidine-2-carboxylate **2k** (32.7 mg, 0.10 mmol, 1.0 eq.) and ethyl 2-(((tert-butoxycarbonyl)oxy)(phenyl)methyl)acrylate **3a** (46.0 mg,

0.15 mmol, 1.5 eq), the title compound **5m** was obtained as a colorless oil (40.2 mg, 78%, E/Z = 9:1, e.r. = 91:9 (major diastereomer)).  $[\alpha]_D^{25} = 22.0^\circ$  (c = 0.37, CHCl<sub>3</sub>). **<sup>1</sup>H NMR** (300 MHz, Chloroform-d, 298 K)  $\delta$  7.91 (s, 1H), 7.87 – 7.78 (m, 1H), 7.78 – 7.70 (m, 2H), 7.54 (s, 1H), 7.52 – 7.43 (m, 2H), 7.22 – 7.08 (m, 6H), 4.29 (q, J = 6.8 Hz, 2H), 3.96 – 3.83 (m, 2H), 3.26 – 3.14 (m, 3H), 2.83 (d, J = 13.9 Hz, 1H), 1.39 (d, J = 16.1 Hz, 12H) ppm; **<sup>13</sup>C NMR** (75 MHz, Chloroform-d, 298 K)  $\delta$  175.7, 167.7, 154.8, 143.6, 134.8, 133.4, 132.6, 132.4, 129.3, 128.7, 128.6, 128.6, 128.4, 128.2, 128.0, 127.8, 127.6, 126.8, 126.1, 83.6, 61.5, 54.4, 50.0, 41.0, 31.8, 28.0, 14.1 ppm; **IR** (film):  $\nu$  (cm<sup>-1</sup>) 2981, 2936, 1796, 1711, 1631, 1369, 1251, 1202, 1147, 1099, 1020, 849, 757, 700; **HRMS (MALDI-FT ICR)**:  $m/z$  calcd for C<sub>31</sub>H<sub>32</sub>NNaO<sub>6</sub> [M+Na]<sup>+</sup> = 538.22001, found: 538.21925; The enantioselectivity was determined by **HPLC** (YMC Cellulose-SB column, n-hexane:i-PrOH = 80:20, 0.5 mL/min, 10 °C,  $t_{\text{minor}} = 19.2$  min,  $t_{\text{major}} = 25.6$  min).

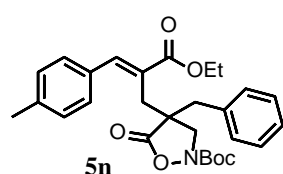

**tert-butyl (E)-4-benzyl-4-(2-(ethoxycarbonyl)-3-(p-tolyl)allyl)-5-oxoisoxazolidine-2-carboxylate (5n)**: Following the general procedure A with tert-butyl 4-benzyl-5-oxoisoxazolidine-2-carboxylate **2a** (27.7 mg, 0.10 mmol, 1.0 eq.) and ethyl 2-(((tert-butoxycarbonyl)oxy)(p-tolyl)methyl)acrylate **3d** (48.0 mg, 0.15 mmol, 1.5 eq.), the title compound

**5n** was obtained as a colorless oil (39.8 mg, 83%, E/Z = 7:1, e.r. = 92:8 (major diastereomer)).  $[\alpha]_D^{25} = 48.8^\circ$  (c = 0.80, CHCl<sub>3</sub>). **<sup>1</sup>H NMR** (300 MHz, Chloroform-d, 298 K)  $\delta$  7.87 (s, 1H), 7.30 – 7.23 (m, 3H), 7.13 – 7.03 (m, 6H), 4.27 (q, J = 7.1 Hz, 2H), 3.90 – 3.77 (m, 2H), 3.15 (s, 2H), 3.04 (d, J = 14.0 Hz, 1H), 2.68 (d, J = 14.0 Hz, 1H), 2.35 (s, 3H), 1.46 (s, 9H), 1.35 (t, J = 7.1 Hz, 3H)



ppm;  $^{13}\text{C}$  NMR (75 MHz, Chloroform-d, 298 K)  $\delta$  175.7, 167.8, 154.9, 143.6, 138.9, 134.9, 131.9, 130.4, 129.5, 129.0, 128.7, 127.4, 127.0, 83.6, 61.4, 54.4, 49.8, 40.9, 31.8, 28.1, 21.3, 14.1 ppm; IR (film):  $\nu$  (cm $^{-1}$ ) 2979, 2928, 1797, 1715, 1629, 1497, 1369, 1292, 1147, 1021, 848, 813, 759, 703; HRMS (MALDI-FT ICR):  $m/z$  calcd for  $\text{C}_{28}\text{H}_{33}\text{NNaO}_6$   $[\text{M}+\text{Na}]^+= 502.22001$ , found: 502.21964; The enantioselectivity was determined by HPLC (Chiralpak IC column, n-hexane:i-PrOH = 80:20, 1.0 mL/min,  $t_{\text{minor}} = 15.8$  min,  $t_{\text{major}} = 25.2$  min).

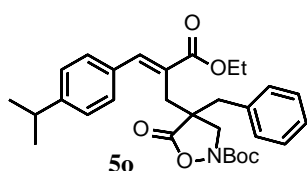

**tert-butyl (E)-4-benzyl-4-(2-(ethoxycarbonyl)-3-(4-isopropylphenyl)allyl)-5-oxoisoxazolidine-2-carboxylate (5o):**

Following the general procedure A with tert-butyl 4-benzyl-5-oxoisoxazolidine-2-carboxylate **2a** (27.7 mg, 0.10 mmol, 1.0 eq.) and ethyl 2-(((tert-butoxycarbonyl)oxy)(4-isopropylphenyl)methyl)acrylate **3e** (52.3 mg, 0.15 mmol, 1.5 eq.), the title compound **5o** was obtained as a colorless oil (34.0 mg, 67%, E/Z= 6:1, e.r.= 91:9 (major diastereomer)).  $[\alpha]_D^{24} = 45.7^\circ$  ( $c = 1.00$ ,  $\text{CHCl}_3$ ).  $^1\text{H}$  NMR (300 MHz, Chloroform-d, 298 K)  $\delta$  7.85 (s, 1H), 7.29 – 7.22 (m, 3H), 7.15 – 7.05 (m, 6H), 4.27 (q,  $J = 7.1$  Hz, 2H), 3.86 (s, 2H), 3.22 – 3.09 (m, 2H), 3.05 (d,  $J = 14.0$  Hz, 1H), 2.96 – 2.83 (m, 1H), 2.71 (d,  $J = 14.0$  Hz, 1H), 1.46 (s, 9H), 1.35 (t,  $J = 7.1$  Hz, 3H), 1.26 (s, 3H), 1.24 (s, 3H). ppm;  $^{13}\text{C}$  NMR (75 MHz, Chloroform-d, 298 K)  $\delta$  175.8, 167.9, 154.9, 149.8, 143.6, 134.9, 132.2, 130.5, 129.2, 128.8, 128.7, 127.4, 126.9, 83.6, 61.4, 54.4, 49.7, 41.1, 33.9, 31.8, 28.1, 23.8, 23.8, 14.1 ppm; IR (film):  $\nu$  (cm $^{-1}$ ) 2979, 1797, 1714, 1635, 1455, 1369, 1253, 1146, 1017, 848, 703; HRMS (MALDI-FT ICR):  $m/z$  calcd for  $\text{C}_{30}\text{H}_{37}\text{NNaO}_6$   $[\text{M}+\text{Na}]^+= 530.25131$ , found: 530.25046; The enantioselectivity was determined by HPLC (Chiralpak AD-H column, n-hexane:i-PrOH = 80:20, 0.5 mL/min,  $t_{\text{major}} = 14.2$  min,  $t_{\text{minor}} = 15.6$  min).

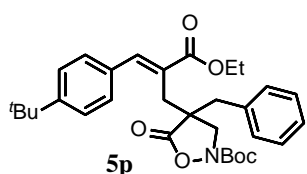

**tert-butyl (E)-4-benzyl-4-(3-(4-(tert-butyl)phenyl)-2-(ethoxycarbonyl)allyl)-5-oxoisoxazolidine-2-carboxylate (5p):**

Following the general procedure A with tert-butyl 4-benzyl-5-oxoisoxazolidine-2-carboxylate **2a** (27.7 mg, 0.10 mmol, 1.0 eq.) and ethyl 2-(((tert-butoxycarbonyl)oxy)(4-(tert-butyl)phenyl)methyl)acrylate **3f** (54.4 mg, 0.15 mmol, 1.5 eq.), the title compound **5p** was obtained as a colorless oil (40.2 mg, 77%, E/Z= 8:1, e.r.= 91:9 (major diastereomer)).  $[\alpha]_D^{26} = 63.4^\circ$  ( $c = 0.80$ ,  $\text{CHCl}_3$ ).  $^1\text{H}$  NMR (400 MHz, Chloroform-d, 298 K)  $\delta$  7.84 (s, 1H), 7.32 – 7.22 (m, 5H), 7.11 (d,  $J = 7.8$  Hz, 4H), 4.33 – 4.21 (m, 2H), 3.91 – 3.83 (m, 2H), 3.23 – 3.10 (m, 2H), 3.05 (d,  $J = 13.9$  Hz, 1H), 2.73 (d,  $J = 13.9$  Hz, 1H), 1.47 (s, 9H), 1.38 – 1.29 (m, 12H) ppm;  $^{13}\text{C}$  NMR (100 MHz, Chloroform-d, 298 K)  $\delta$  175.8, 167.8, 154.8, 152.0, 143.4, 134.9, 131.7, 130.4, 128.9, 128.6, 127.3, 126.8, 125.6, 83.5, 61.3, 54.4, 49.5, 40.9, 34.6, 31.7, 31.1, 28.0, 14.0 ppm; IR (film):  $\nu$  (cm $^{-1}$ ) 3023, 2966, 2929, 2856, 1798, 1713, 1456, 1394, 1319, 1295, 1255, 1216, 1192, 1147, 1023, 849, 758, 703, 667; HRMS (MALDI-FT ICR):  $m/z$  calcd for  $\text{C}_{31}\text{H}_{39}\text{NNaO}_6$   $[\text{M}+\text{Na}]^+= 544.26696$ , found: 544.26616; The enantioselectivity was determined by HPLC (Chiralpak IC column, n-hexane:i-PrOH = 80:20, 1.0 mL/min,  $t_{\text{minor}} = 12.2$  min,  $t_{\text{major}} = 19.9$  min).

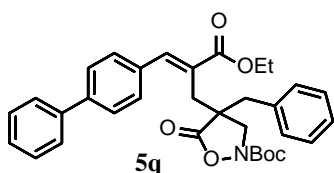

**tert-butyl (E)-4-(3-([1,1'-biphenyl]-4-yl)-2-(ethoxycarbonyl)allyl)-4-benzyl-5-oxoisoxazolidine-2-carboxylate (5q):** Following the general procedure A with tert-butyl 4-benzyl-5-oxoisoxazolidine-2-carboxylate **2a** (27.7 mg, 0.10 mmol, 1.0 eq.) and ethyl 2-([1,1'-biphenyl]-4-yl)((tert-butoxycarbonyl)oxy)methyl)acrylate **3g** (57.4 mg, 0.15 mmol, 1.5 eq.),

the title compound **5q** was obtained as a colorless oil (49.8 mg, 92%, E/Z= 8:1, e.r.= 92:8 (major diastereomer)).  $[\alpha]_D^{23} = 44.1^\circ$  (c = 1.00, CHCl<sub>3</sub>). <sup>1</sup>H NMR (300 MHz, Chloroform-d, 298 K) δ 7.92 (s, 1H), 7.61 (d, J = 7.7 Hz, 2H), 7.53 (d, J = 8.0 Hz, 2H), 7.46 (d, J = 7.7 Hz, 2H), 7.40 (d, J = 7.4 Hz, 1H), 7.34 (d, J = 8.3 Hz, 1H), 7.25 (d, J = 6.3 Hz, 4H), 7.15 – 7.04 (m, 2H), 4.30 (q, J = 7.1 Hz, 2H), 3.89 (s, 2H), 3.27 – 3.13 (m, 2H), 3.07 (d, J = 13.9 Hz, 1H), 2.74 (d, J = 13.9 Hz, 1H), 1.47 (s, 9H), 1.37 (t, J = 7.1 Hz, 3H). ppm; <sup>13</sup>C NMR (75 MHz, Chloroform-d, 298 K) δ 175.7, 167.7, 154.9, 143.1, 141.4, 140.1, 134.9, 133.7, 130.4, 129.6, 128.9, 128.8, 127.8, 127.5, 127.4, 127.0, 127.0, 83.7, 61.5, 54.5, 49.8, 40.9, 31.8, 28.1, 14.1 ppm; IR (film): ν (cm<sup>-1</sup>) 2978, 2924, 2849, 1797, 1713, 1628, 1604, 1488, 1455, 1369, 1291, 1253, 1146, 1097, 1007, 848, 763, 700; HRMS (MALDI-FT ICR): m/z calcd for C<sub>33</sub>H<sub>35</sub>NNaO<sub>6</sub> [M+Na]<sup>+</sup> = 564.23566, found: 564.23490; The enantioselectivity was determined by HPLC (Chiralpak IC column, n-hexane:i-PrOH = 80:20, 1.0 mL/min, t<sub>minor</sub> = 17.1 min, t<sub>major</sub> = 25.6 min).

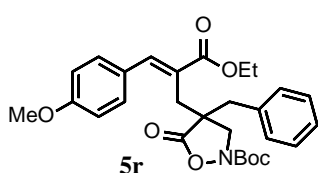

**tert-butyl (E)-4-benzyl-4-(2-(ethoxycarbonyl)-3-(4-methoxyphenyl)allyl)-5-oxoisoxazolidine-2-carboxylate (5r):**

Following the general procedure A with tert-butyl 4-benzyl-5-oxoisoxazolidine-2-carboxylate **2a** (27.7 mg, 0.10 mmol, 1.0 eq.) and ethyl 2-(((tert-butoxycarbonyl)oxy)(4-methoxyphenyl)methyl)acrylate **3h** (50.4 mg, 0.15 mmol, 1.5 eq.), the title compound **5r** was obtained as a colorless oil (40.1 mg, 81%, E/Z= 11:1, e.r.= 92:8 (major diastereomer)).  $[\alpha]_D^{24} = 39.6^\circ$  (c = 1.00, CHCl<sub>3</sub>). <sup>1</sup>H NMR (400 MHz, Chloroform-d, 298 K) δ 7.82 (s, 1H), 7.31 – 7.26 (m, 3H), 7.17 – 7.08 (m, 4H), 6.79 (d, J = 8.8 Hz, 2H), 4.26 (m, 2H), 3.87 (s, 2H), 3.82 (s, 3H), 3.16 (s, 2H), 3.06 (d, J = 13.9 Hz, 1H), 2.74 (d, J = 13.9 Hz, 1H), 1.46 (s, 9H), 1.34 (t, J = 7.1 Hz, 3H) ppm; <sup>13</sup>C NMR (150 MHz, Chloroform-d, 298 K) δ 175.8, 168.0, 160.0, 154.9, 143.2, 135.0, 130.9, 130.5, 128.7, 127.4, 127.2, 125.6, 114.2, 83.6, 61.3, 55.3, 54.4, 49.8, 41.0, 31.7, 28.1, 14.1 ppm; IR (film): ν (cm<sup>-1</sup>) 2981, 2921, 2850, 1796, 1709, 1605, 1512, 1456, 1369, 1303, 1255, 1176, 1146, 1030, 847, 759, 700; HRMS (MALDI-FT ICR): m/z calcd for C<sub>28</sub>H<sub>33</sub>NNaO<sub>6</sub> [M+Na]<sup>+</sup> = 518.21492, found: 518.21503; The enantioselectivity was determined by HPLC (Chiralpak IC column, n-hexane:i-PrOH = 80:20, 1.0 mL/min, t<sub>minor</sub> = 21.8 min, t<sub>major</sub> = 32.6 min).

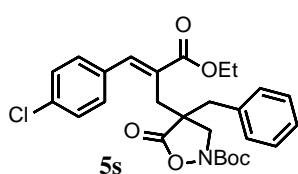

**tert-butyl (E)-4-benzyl-4-(3-(4-chlorophenyl)-2-(ethoxycarbonyl)allyl)-5-oxoisoxazolidine-2-carboxylate (5s):**

Following the general procedure A with tert-butyl 4-benzyl-5-oxoisoxazolidine-2-carboxylate **2a** (27.7 mg, 0.10 mmol, 1.0 eq.) and ethyl 2-(((tert-butoxycarbonyl)oxy)(4-chlorophenyl)methyl)acrylate **3i** (51.1 mg, 0.15 mmol, 1.5 eq.), the title compound **5s** was obtained as a colorless oil (39.0 mg, 78%, E/Z= 5:1, e.r.= 92:8 (major diastereomer)).  $[\alpha]_D^{24} = 37.9^\circ$  (c = 1.00, CHCl<sub>3</sub>). <sup>1</sup>H NMR (300 MHz, Chloroform-d, 298 K) δ 7.81 (s, 1H), 7.33 – 7.19 (m, 5H), 7.14 – 7.01 (m, 4H), 4.27 (q, J = 7.1 Hz, 2H), 3.88 – 3.75 (m, 2H), 3.07 (s, 2H), 3.02 (d, J = 14.0 Hz, 1H), 2.69 (d, J = 14.0 Hz, 1H), 1.47 (s, 9H), 1.35 (t, J = 7.1 Hz, 3H) ppm; <sup>13</sup>C NMR (75 MHz, Chloroform-d, 298 K) δ 175.5, 167.4, 154.9,

142.1, 134.7, 134.6, 133.2, 130.4, 130.1, 129.0, 128.8, 128.6, 127.5, 83.8, 61.6, 54.4, 49.8, 40.8, 31.4, 28.1, 14.1 ppm; **IR** (film):  $\nu$  (cm<sup>-1</sup>) 2981, 1798, 1713, 1634, 1490, 1369, 1253, 1146, 1093, 1013, 762, 703; **HRMS (MALDI-FT ICR)**:  $m/z$  calcd for C<sub>27</sub>H<sub>30</sub>ClNNaO<sub>6</sub> [M+Na]<sup>+</sup> = 522.16539, found: 522.16470; The enantioselectivity was determined by **HPLC** (Chiralpak AD-H column, n-hexane:i-PrOH = 80:20, 0.5 mL/min,  $t_{\text{major}}$  = 15.1 min,  $t_{\text{minor}}$  = 17.9 min).

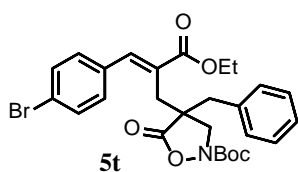

**tert-butyl**

**(E)-4-benzyl-4-(3-(4-bromophenyl)-2-**

**(ethoxycarbonyl)allyl)-5-oxoisoxazolidine-2-carboxylate**

**(5t):**

Following the general procedure A with tert-butyl 4-benzyl-5-oxoisoxazolidine-2-carboxylate **2a** (27.7 mg, 0.10 mmol, 1.0 eq.) and ethyl 2-((4-bromophenyl)((tert-butoxycarbonyl)oxy)methyl)acrylate **3j** (57.8 mg, 0.15 mmol, 1.5 eq.), the title compound **5t** was obtained as a colorless oil (44.1 mg, 81%, E/Z = 5:1, e.r. = 91:9 (major diastereomer)).  $[\alpha]_D^{26} = 27.0^\circ$  (c = 0.80, CHCl<sub>3</sub>). **<sup>1</sup>H NMR** (300 MHz, Chloroform-d, 298 K)  $\delta$  7.78 (s, 1H), 7.40 (d, J = 8.2 Hz, 2H), 7.30 – 7.22 (m, 3H), 7.08 – 7.04 (m, 2H), 7.01 (d, J = 8.2 Hz, 2H), 4.27 (q, J = 7.1 Hz, 2H), 3.87 – 3.74 (m, 2H), 3.06 (s, 2H), 3.01 (d, J = 13.9 Hz, 1H), 2.68 (d, J = 13.9 Hz, 1H), 1.47 (s, 9H), 1.34 (t, J = 7.1 Hz, 3H) ppm; **<sup>13</sup>C NMR** (75 MHz, Chloroform-d, 298 K)  $\delta$  175.5, 167.4, 154.9, 142.2, 134.7, 133.7, 132.0, 130.3, 128.8, 128.7, 127.5, 122.8, 83.8, 61.6, 54.4, 49.8, 40.8, 31.4, 28.1, 14.1 ppm; **IR** (film):  $\nu$  (cm<sup>-1</sup>) 2978, 1797, 1712, 1636, 1487, 1456, 1393, 1369, 1308, 1252, 1146, 1074, 1010, 847, 811, 762, 703; **HRMS (MALDI-FT ICR)**:  $m/z$  calcd for C<sub>27</sub>H<sub>30</sub>BrNNaO<sub>6</sub> [M+Na]<sup>+</sup> = 566.11487, found: 566.11408; The enantioselectivity was determined by **HPLC** (Chiralpak AD-H column, n-hexane:i-PrOH = 80:20, 0.5 mL/min,  $t_{\text{major}}$  = 15.1 min,  $t_{\text{minor}}$  = 18.8 min).

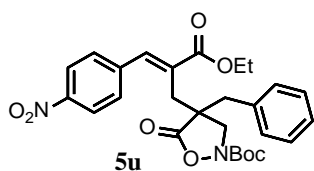

**tert-butyl (E)-4-benzyl-4-(2-(ethoxycarbonyl)-3-(4-nitrophenyl)allyl)-**

**5-oxoisoxazolidine-2-carboxylate (5u):**

Following the general procedure A with tert-butyl 4-benzyl-5-oxoisoxazolidine-2-carboxylate **2a** (27.7 mg, 0.10 mmol, 1.0 eq.) and ethyl 2-(((tert-butoxycarbonyl)oxy)(4-nitrophenyl)methyl)acrylate **3k** (52.7 mg, 0.15 mmol, 1.5 eq.), the title compound **5u** was obtained as a colorless oil (28.1 mg, 55%, E/Z = 5:1, e.r. = 93:7 (major diastereomer)).  $[\alpha]_D^{26} = 19.5^\circ$  (c = 0.80, CHCl<sub>3</sub>). **<sup>1</sup>H NMR** (400 MHz, Chloroform-d, 298 K)  $\delta$  8.11 (d, J = 8.5 Hz, 2H), 7.86 (s, 1H), 7.28 (d, J = 8.5 Hz, 2H), 7.27 – 7.20 (m, 3H), 7.04 (d, J = 7.3 Hz, 2H), 4.37 – 4.22 (m, 2H), 3.82 (d, J = 11.0 Hz, 1H), 3.79 (d, J = 11.0 Hz, 1H), 3.03 (s, 2H), 2.99 (d, J = 14.0 Hz, 1H), 2.70 (d, J = 14.0 Hz, 1H), 1.48 (s, 9H), 1.35 (t, J = 7.1 Hz, 3H) ppm; **<sup>13</sup>C NMR** (100 MHz, Chloroform-d, 298 K)  $\delta$  175.1, 166.8, 154.8, 147.3, 141.4, 140.7, 134.5, 131.1, 130.2, 129.4, 128.7, 127.5, 123.8, 83.9, 61.8, 54.4, 49.7, 40.8, 31.2, 28.0, 13.9 ppm; **IR** (film):  $\nu$  (cm<sup>-1</sup>) 2983, 2933, 2850, 1794, 1719, 1710, 1600, 1476, 1456, 1394, 1370, 1347, 1302, 1254, 1205, 1146, 1110, 1015, 852, 756, 703; **HRMS (MALDI-FT ICR)**:  $m/z$  calcd for C<sub>27</sub>H<sub>32</sub>N<sub>2</sub>NaO<sub>8</sub> [M+2H+Na]<sup>+</sup> = 535.20509, found: 535.20425; The enantioselectivity was determined by **HPLC** (Chiralpak AD-H column, n-hexane:i-PrOH = 80:20, 0.5 mL/min,  $t_{\text{major}}$  = 26.3 min,  $t_{\text{minor}}$  = 30.0 min).

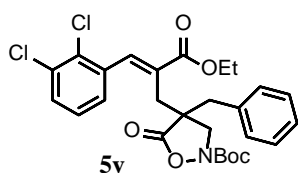

**tert-butyl (E)-4-benzyl-4-(3-(2,3-dichlorophenyl)-2-(ethoxycarbonyl)allyl)-5-oxoisoxazolidine-2-carboxylate (5v):**

Following the general procedure A with tert-butyl 4-benzyl-5-oxoisoxazolidine-2-carboxylate **2a** (27.7 mg, 0.10 mmol, 1.0 eq.) and ethyl 2-(((tert-butoxycarbonyl)oxy)(2,3-dichlorophenyl)methyl)acrylate **3l** (56.3 mg, 0.15 mmol, 1.5 eq.), the title compound **5v** was obtained as a colorless oil (41.9 mg, 90%, E/Z= 4:1, e.r.= 93:7 (major diastereomer)).  $[\alpha]_D^{26} = 25.3^\circ$  (c = 0.80, CHCl<sub>3</sub>). **<sup>1</sup>H NMR** (400 MHz, Chloroform-d, 298 K)  $\delta$  7.81 (s, 1H), 7.41 (d, J = 7.9 Hz, 1H), 7.23 – 7.17 (m, 3H), 7.14 (t, J = 7.9 Hz, 1H), 7.04 – 6.96 (m, 3H), 4.36 – 4.21 (m, 2H), 3.82 (d, J = 11.0 Hz, 1H), 3.77 (d, J = 11.0 Hz, 1H), 2.99 – 2.92 (m, 3H), 2.59 (d, J = 13.9 Hz, 1H), 1.47 (s, 9H), 1.35 (t, J = 7.1 Hz, 3H). ppm; **<sup>13</sup>C NMR** (100 MHz, Chloroform-d, 298 K)  $\delta$  175.2, 166.8, 154.9, 140.2, 135.8, 134.6, 133.6, 131.6, 130.7, 130.3, 130.1, 128.5, 127.7, 127.4, 127.3, 83.7, 61.6, 54.4, 49.7, 40.4, 31.6, 28.0, 14.0. ppm; **IR** (film):  $\nu$  (cm<sup>-1</sup>) 3017, 2928 2856, 1795, 1717, 1641, 1559, 1456, 1411, 1395, 1371, 1216, 1184, 1149, 1098, 1049, 1024, 848, 760, 702, 668; **HRMS (MALDI-FT ICR)**: *m/z* calcd for C<sub>27</sub>H<sub>29</sub>Cl<sub>2</sub>NNaO<sub>6</sub> [M+Na]<sup>+</sup> = 556.12641, found: 556.12582; The enantioselectivity was determined by **HPLC** (Chiralpak IC column, n-hexane:i-PrOH = 80:20, 1.0 mL/min, *t*<sub>minor</sub> = 13.0 min, *t*<sub>major</sub> = 17.2 min).

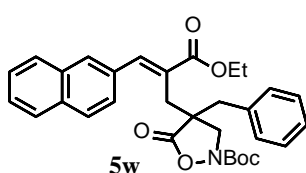

**tert-butyl (E)-4-benzyl-4-(2-(ethoxycarbonyl)-3-(naphthalen-2-yl)allyl)-5-oxoisoxazolidine-2-carboxylate (5w):**

Following the general procedure A with tert-butyl 4-benzyl-5-oxoisoxazolidine-2-carboxylate **2a** (27.7 mg, 0.10 mmol, 1.0 eq.) and ethyl 2-(((tert-butoxycarbonyl)oxy)(naphthalen-2-yl)methyl)acrylate **3m** (53.5 mg, 0.15 mmol, 1.5 eq.), the title compound **5w** was obtained as a colorless oil (32.0 mg, 62%, E/Z= 7:1, e.r.= 91:9 (major diastereomer)).  $[\alpha]_D^{25} = 45.3^\circ$  (c = 0.80, CHCl<sub>3</sub>). **<sup>1</sup>H NMR** (300 MHz, Chloroform-d, 298 K)  $\delta$  8.06 (s, 1H), 7.89 – 7.68 (m, 4H), 7.59 – 7.47 (m, 2H), 7.40 – 7.20 (m, 2H), 7.16 – 7.07 (m, 2H), 7.05 – 6.92 (m, 2H), 4.31 (q, J = 7.1 Hz, 2H), 3.89 (d, J = 11.0 Hz, 1H), 3.80 (d, J = 11.0 Hz, 1H), 3.22 (s, 2H), 3.05 (d, J = 13.9 Hz, 1H), 2.65 (d, J = 13.9 Hz, 1H), 1.45 (s, 9H), 1.38 (t, J = 7.1 Hz, 3H) ppm; **<sup>13</sup>C NMR** (75 MHz, Chloroform-d, 298 K)  $\delta$  175.5, 167.7, 154.9, 143.6, 134.8, 133.1, 133.0, 132.4, 130.2, 128.8, 128.6, 128.5, 128.4, 128.2, 127.7, 127.4, 126.9, 126.6, 125.9, 83.63, 61.49, 54.60, 49.93, 40.79, 31.96, 28.05, 14.13. ppm; **IR** (film):  $\nu$  (cm<sup>-1</sup>) 3017, 2928, 2856, 1795, 1717, 1641, 1456, 1411, 1395, 1371, 1216, 1184, 1149, 1098, 1049, 1024, 848, 760, 702, 668; **HRMS (MALDI-FT ICR)**: *m/z* calcd for C<sub>31</sub>H<sub>33</sub>NNaO<sub>6</sub> [M+Na]<sup>+</sup> = 538.22001, found: 538.21934; The enantioselectivity was determined by **HPLC** (Chiralpak AD-H column, n-hexane:i-PrOH = 80:20, 0.5 mL/min, *t*<sub>major</sub> = 18.6 min, *t*<sub>minor</sub> = 21.4 min).

**tert-butyl 4-benzyl-4-(2-benzyl-3-ethoxy-3-oxopropyl)-5-oxoisoxazolidine-2-carboxylate (6a):**

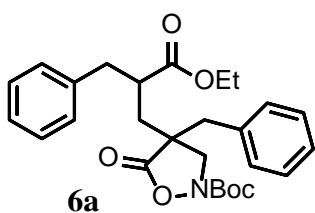

**5a** (22.7 mg, 0.05 mmol, 1 eq.) was dissolved in MeOH and Pd/C (10% w/w, 2.1 mg, 0.002 mmol, 0.04 eq.) was added followed by three freeze-pump-thaw cycles to remove any remaining oxygen. The reaction mixture was flushed with hydrogen, and then vigorously stirred under a hydrogen atmosphere (balloon) over night at room temperature. The catalyst was filtered off over a pad of Celite® and washed 3 times with

DCM. The filtrate was concentrated to give (**6a**) as a colourless oil (22.4 mg, 0.05 mmol, quant., d.r.=2:1). <sup>1</sup>H NMR (700 MHz, δ, CDCl<sub>3</sub>, 298 K): *Major*: 1.12 (t, *J* = 7.1 Hz, 3H), 1.46 (s, 9H), 1.77 (dd, *J* = 14.6, 1.8 Hz, 1H), 2.19-2.26 (m, 1H), 2.68-2.72 (m, 1H), 2.73 (d, *J* = 13.9 Hz, 1H), 2.84-2.91 (m, 1H), 2.92-2.96 (m, 1H), 2.95 (d, *J* = 13.9 Hz, 1H), 3.71 (d, *J* = 11.1 Hz, 1H), 3.88 (d, *J* = 11.1 Hz, 1H), 4.00-4.08 (m, 2H), 6.98-7.00 (m, 1H), 7.08 (d, *J* = 11.1 Hz, 1H), 7.13-7.15 (m, 1H), 7.22-7.31 (m, 7H). *Minor*: 1.15 (t, *J* = 7.1 Hz, 3H), 1.48 (s, 9H), 1.86 (dd, *J* = 14.8, 2.6 Hz, 1H), 2.19-2.26 (m, 1H), 2.68-2.72 (m, 1H), 2.80 (d, *J* = 13.9 Hz, 1H), 2.84-2.91 (m, 1H), 2.92-2.96 (m, 1H), 3.00 (d, *J* = 13.9 Hz, 1H), 3.75 (d, *J* = 11.0 Hz, 1H), 3.90 (d, *J* = 11.0 Hz, 1H), 4.00-4.08 (m, 2H), 6.98-7.00 (m, 1H), 7.12-7.15 (m, 2H), 7.22-7.31 (m, 7H). <sup>13</sup>C NMR (176 MHz, δ, CDCl<sub>3</sub>, 298 K): *Major*: 14.1, 28.2, 35.4, 40.0, 40.5, 43.5, 48.9, 56.0, 61.0, 84.0, 127.0, 127.6, 128.7, 128.9, 129.3, 130.2, 134.7, 138.0, 155.7, 174.7, 175.7. *Minor*: 14.1, 28.2, 29.8, 36.3, 39.7, 40.1, 43.1, 48.8, 55.3, 61.1, 84.0, 126.9, 127.7, 128.7, 128.8, 129.1, 130.3, 134.7, 138.1, 155.5, 174.8, 175.4. IR (film): ν (cm<sup>-1</sup>) 3326, 3030, 2979, 2926, 2853, 1792, 1719, 1455, 1369, 1275, 1146, 1029, 847, 747, 700. HRMS (ESI): *m/z* calcd for C<sub>27</sub>H<sub>33</sub>NO<sub>6</sub>: 468.2381[M+H]<sup>+</sup>; found: 468.2370.

**2,4-dibenzyl-2-(((tert-butoxycarbonyl)amino)methyl)-5-ethoxy-5-oxopentanoic acid (7a):**

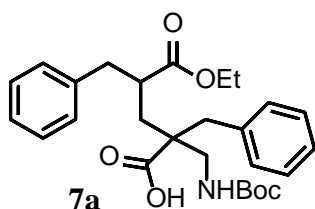

**5a** (57.6 mg, 0.12 mmol, 1 eq.) was dissolved in MeOH and Pd/C (10% w/w, 13.2 mg, 0.012 mmol, 0.1 eq.) was added followed by three freeze-pump-thaw cycles to remove any remaining oxygen. The reaction mixture was flushed with hydrogen, and then vigorously stirred under a hydrogen atmosphere (balloon) over night at room temperature. The catalyst was filtered off over a pad of Celite® and washed 3 times with DCM. The

filtrate was concentrated to give (**7a**) as a colourless oil (57.1 mg, 0.12 mmol, quant., d.r.=2:1). Mixture of diastereomers (ratio 2:1): <sup>1</sup>H NMR (300 MHz, δ, CDCl<sub>3</sub>, 298 K): 0.88-0.98 (m, 3H), 1.48 (s, 9H), 1.66-1.84 (m, 1H), 2.23-2.34 (m, 1H), 2.67-2.99 (m, 6H), 3.33-3.55 (m, 1H), 3.88-3.99 (m, 2H), 7.10-7.27 (m, 10H). <sup>13</sup>C NMR (75 MHz, δ, CDCl<sub>3</sub>, 298 K): 13.9, 28.4, 35.8, 40.7, 41.1, 43.4, 43.7, 51.4, 60.6, 79.5, 126.6, 126.8, 128.3, 128.4, 129.1, 130.1, 130.2, 136.1, 138.3, 138.4, 156.2, 176.1, 180.5. IR (film): ν (cm<sup>-1</sup>) 3370, 2978, 2927, 2854, 1712, 1497, 1454, 1392, 1366, 1325, 1248, 1163, 1046, 1023, 990, 851, 700. HRMS (ESI): *m/z* calcd for C<sub>27</sub>H<sub>33</sub>NO<sub>6</sub>: 470.2537[M+H]<sup>+</sup>; found: 470.2528.

### 1.2.3 General procedure for the synthesis of benzyl-substituted isoxazolidin-5-one 2a-k:

The benzyl-substituted isoxazolidin-5-one **2** were prepared according to literature.<sup>5,6</sup>

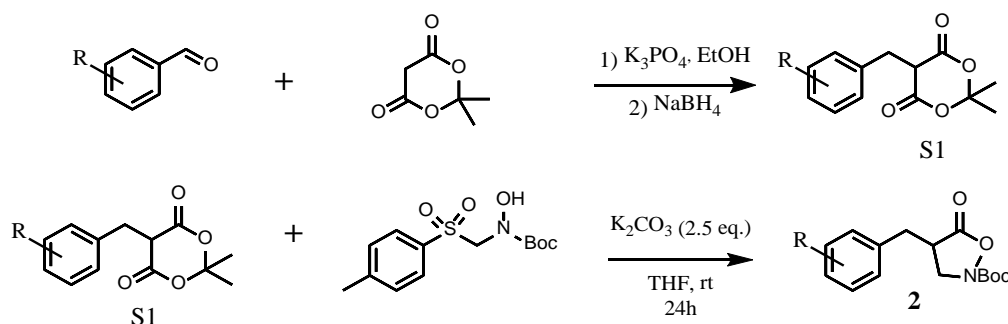

To a stirred solution of Meldrum's acid (1.0 eq., 2.08 mmol) in ethanol (10 ml) was added potassium phosphate (0.20 eq., 0.416 mmol) and the appropriate substituted benzaldehyde (1.0 eq., 2.08 mmol). After 24-48 h the temperature of the reaction mixture was cooled at 0 °C and sodium borohydride (1.05 eq., 2.18 mmol) was added and the mixture was stirred overnight at room temperature. Afterward, 1 M aqueous HCl was added drop by drop until the pH value to 7 (or 6-5). Ethanol was removed by using a rotary evaporator and the crude product was extracted with ethyl acetate (3x60 mL). The combined organic phases washed with brine and dried over Na<sub>2</sub>SO<sub>4</sub>, the solvent evaporated and the residue dried in vacuo to yield derivatives of meldrum's acid **S1**.

To a solution of crude **S1** in THF (0.1 M) were added *tert*-butyl hydroxy(tosylmethyl)carbamate (1.0 eq.) and K<sub>2</sub>CO<sub>3</sub>(2.5 eq.) at 25 °C. After 24h, the reaction mixture was filtered through a pad of sodium sulphate, washed with DCM and the filtrates were evaporated under reduced pressure to give the crude residue that was purified by chromatography (silica gel, heptane-ethyl acetate, 25/1 to 15/1) to yield benzyl-substituted isoxazolidin-5-one **2** as a oil or a white/yellow solid.

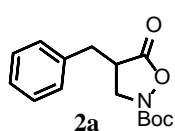

**tert-butyl 4-benzyl-5-oxoisoxazolidine-2-carboxylate (2a):**

Known compound<sup>7</sup>

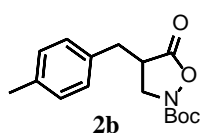

**tert-butyl 4-(4-methylbenzyl)-5-oxoisoxazolidine-2-carboxylate (2b):**

<sup>1</sup>H NMR (300 MHz, Chloroform-d, 298 K) δ 7.14 (d, J = 7.8 Hz, 2H), 7.08 (d, J = 7.8 Hz, 2H), 4.24 – 4.03 (m, 1H), 3.81 – 3.60 (m, 1H), 3.31 – 3.04 (m, 2H), 2.76 (dd, J = 13.7, 9.4 Hz, 1H), 2.33 (s, 3H), 1.51 (s, 9H) ppm;

<sup>13</sup>C NMR (75 MHz, Chloroform-d, 298 K): δ 174.3, 156.0, 136.9, 133.8, 129.6, 128.6, 84.1, 52.9, 42.2, 34.0, 28.0, 21.0 ppm.

<sup>5</sup> U. V. Desai, D. M. Pore, R. B. Mane, S. B. Solabannavar, P. P. Wadgaonkar, *Synthetic Communications*, **2004**, 34, 25-32.

<sup>6</sup> T. Cadart, C. Berthonneau, V. Levacher, S. Perrio, J.-F. Brière, *Chem. Eur. J.*, **2016**, 22, 15261-15264.

<sup>7</sup> T. Tite, M. Sabbah, V. Levacher, J. F. Brière, *Chem. Commun.*, **2013**, 49, 11569-11571.

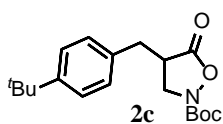

**tert-butyl 4-(4-(tert-butyl)benzyl)-5-oxoisoxazolidine-2-carboxylate (2c):**

$^1\text{H}$  NMR (300 MHz, Chloroform-d, 298 K)  $\delta$  7.35 (d,  $J$  = 8.0 Hz, 2H), 7.13 (d,  $J$  = 8.0 Hz, 2H), 4.16 (dd,  $J$  = 11.0, 8.3 Hz, 1H), 3.82 – 3.62 (m, 1H), 3.33 – 3.03 (m, 2H), 2.76 (dd,  $J$  = 13.7, 9.6 Hz, 1H), 1.52 (s, 9H), 1.31 (s, 9H) ppm;

$^{13}\text{C}$  NMR (75 MHz, Chloroform-d, 298 K)  $\delta$  174.4, 156.0, 150.2, 133.9, 128.4, 125.9, 84.1, 53.0, 42.2, 34.5, 34.0, 31.3, 28.1 ppm.

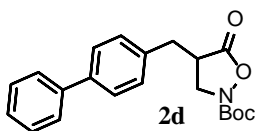

**tert-butyl 4-([1,1'-biphenyl]-4-ylmethyl)-5-oxoisoxazolidine-2-carboxylate (2d):**

$^1\text{H}$  NMR (300 MHz, Chloroform-d, 298 K)  $\delta$  7.64 – 7.52 (m, 4H), 7.45 (t,  $J$  = 7.4 Hz, 2H), 7.37 (d,  $J$  = 7.4 Hz, 1H), 7.27 (d,  $J$  = 7.9 Hz, 2H), 4.20 (dd,  $J$  = 11.1, 8.2 Hz, 1H), 3.85 – 3.66 (m, 1H), 3.36 – 3.12 (m, 2H), 2.86 (dd,  $J$  = 13.7, 9.4 Hz, 1H), 1.53 (s, 9H) ppm;

$^{13}\text{C}$  NMR (75 MHz, Chloroform-d, 298 K)  $\delta$  174.2, 156.0, 140.5, 140.2, 136.0, 129.2, 128.9, 127.7, 127.5, 127.0, 84.2, 53.0, 42.2, 34.1, 28.1 ppm.

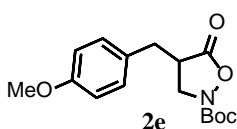

**tert-butyl 4-(4-methoxybenzyl)-5-oxoisoxazolidine-2-carboxylate (2e):**

Known compound<sup>7</sup>

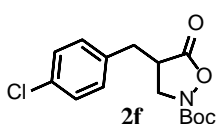

**tert-butyl 4-(4-chlorobenzyl)-5-oxoisoxazolidine-2-carboxylate (2f):**

Known compound<sup>8</sup>

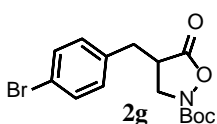

**tert-butyl 4-(4-bromobenzyl)-5-oxoisoxazolidine-2-carboxylate (2g):**

Known compound<sup>8</sup>

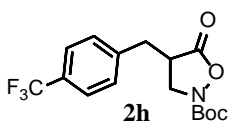

**tert-butyl 5-oxo-4-(4-(trifluoromethyl)benzyl)isoxazolidine-2-carboxylate (2h):**

$^1\text{H}$  NMR (300 MHz, Chloroform-d, 298 K)  $\delta$  7.60 (d,  $J$  = 8.0 Hz, 2H), 7.33 (d,  $J$  = 8.0 Hz, 2H), 4.17 (dd,  $J$  = 11.1, 8.4 Hz, 1H), 3.77 – 3.59 (m, 1H), 3.37 – 3.11 (m, 2H), 2.89 (dd,  $J$  = 13.9, 9.2 Hz, 1H), 1.51 (s, 9H) ppm;

$^{13}\text{C}$  NMR (75 MHz, Chloroform-d, 298 K)  $\delta$  173.8, 155.8, 140.9, 129.7 (q,  $J$  = 32.6 Hz), 129.2, 126.0 (q,  $J$  = 3.7 Hz), 124.0 (q,  $J$  = 272.0 Hz), 84.4, 52.8, 41.8, 34.2, 28.0 ppm.

<sup>8</sup> J. S. Yu, H. Noda, M. Shibasaki, *Angew. Chem. Int. Ed.*, **2018**, 57, 818-822.

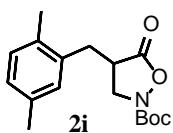

**tert-butyl 4-(2,5-dimethylbenzyl)-5-oxoisoxazolidine-2-carboxylate (2i):**

$^1\text{H}$  NMR (300 MHz, Chloroform-d, 298 K)  $\delta$  7.07 (d,  $J = 7.7$  Hz, 1H), 6.99 (d,  $J = 7.7$  Hz, 1H), 6.92 (s, 1H), 4.15 (dd,  $J = 11.1, 8.3$  Hz, 1H), 3.79 – 3.67 (m, 1H), 3.28 (dd,  $J = 14.3, 4.3$  Hz, 2H), 3.21 – 3.05 (m, 1H), 2.72 (dd,  $J = 14.3, 10.4$  Hz, 1H), 2.31 (s, 3H), 2.29 (s, 3H), 1.53 (s, 9H) ppm;

$^{13}\text{C}$  NMR (75 MHz, Chloroform-d, 298 K)  $\delta$  174.4, 156.0, 136.0, 135.1, 132.9, 130.7, 129.8, 128.1, 84.2, 53.3, 41.1, 31.9, 28.1, 21.0, 18.9 ppm.

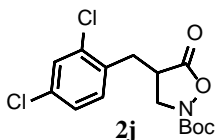

**tert-butyl 4-(2,4-dichlorobenzyl)-5-oxoisoxazolidine-2-carboxylate (2j):**

$^1\text{H}$  NMR (300 MHz, Chloroform-d, 298 K)  $\delta$  7.40 (s, 1H), 7.21 (s, 2H), 4.17 (dd,  $J = 11.1, 8.2$  Hz, 1H), 3.77 – 3.63 (m, 1H), 3.45 – 3.14 (m, 2H), 2.90 (dd,  $J = 13.6, 8.2$  Hz, 1H), 1.50 (s, 9H) ppm;

$^{13}\text{C}$  NMR (75 MHz, Chloroform-d, 298 K)  $\delta$  173.8, 155.8, 134.7, 134.0, 133.3, 131.9, 129.7, 127.7, 84.4, 52.9, 40.4, 31.5, 28.0 ppm.

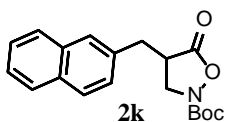

**tert-butyl 4-(naphthalen-2-ylmethyl)-5-oxoisoxazolidine-2-carboxylate (2k):**

Known compound<sup>7</sup>



### 1.2.4 Preparation of Morita-Baylis-Hillman Carbonates **3a-m**:

The Morita-Baylis-Hillman carbonates **3** were prepared according to the literature.<sup>9,10</sup>

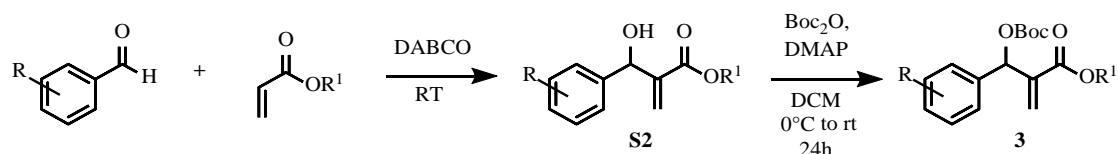

A mixture of aldehyde (1.0 eq, 4.41 mmol), acrylate (2.0 eq., 8.81 mmol) and DABCO (0.40 eq., 1.76 mmol) was stirred for 3-7 days at rt. Then, the mixture was diluted with Et<sub>2</sub>O (30 mL) and washed with water (2x20 mL), 1M HCl (1x20 mL) and brine (10 mL). The organic phase was dried with sodium sulphate and evaporated in vacuo to yield alcohols **S2**.

Then, alcohols **S2** were converted to the corresponding carbonates **3a-m**: alcohol S1 (1.0 eq., 1.0 mmol) and Boc<sub>2</sub>O (1.1 eq., 1.1 mmol) were dissolved in DCM (2.0 mL) and the solution was cooled to 0°C. Afterward, DMAP (0.10 eq., 0.10 mmol) was added and the reaction mixture stirred at room temperature for 24h. After 24h, the reaction mixture was diluted with CH<sub>2</sub>Cl<sub>2</sub>. The combined organic phase was washed with 4 N aq. HCl solution, saturated aq. NaHCO<sub>3</sub> and brine. The organic layer, dried over anhydrous Na<sub>2</sub>SO<sub>4</sub>, filtered and vacuum at rotary evaporator to obtain an oil. The crude product was purified by chromatography (silica gel, heptane-ethyl acetate, 50/1 to 20/1) to afford an oil or a white/pale yellow solid.

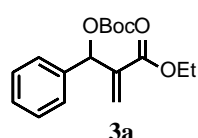

**ethyl 2-(((tert-butoxycarbonyl)oxy)(phenyl)methyl)acrylate (3a):**

Known compound<sup>10</sup>

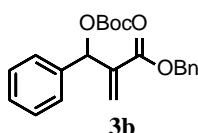

**benzyl 2-(((tert-butoxycarbonyl)oxy)(phenyl)methyl)acrylate (3b):**

Known compound<sup>11</sup>

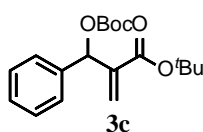

**tert-butyl 2-(((tert-butoxycarbonyl)oxy)(phenyl)methyl)acrylate (3c):**

Known compound<sup>12</sup>

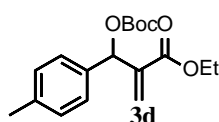

**ethyl 2-(((tert-butoxycarbonyl)oxy)(p-tolyl)methyl)acrylate (3d):**

Known compound<sup>13</sup>

<sup>9</sup> M. Kalyva, A. L. Zografos, E. Kapourani, E. Giambazolias, L. Devel, A. Papakyriakou, V. Dive, Y. G. Lazarou, D. Georgiadis, *Chem. Eur. J.*, **2015**, 21, 3278-3289.

<sup>10</sup> S. J. Singha Roy, S. Mukherjee, *Chem. Commun.*, **2014**, 50, 121-123.

<sup>11</sup> L. Zhang, H. Liu, G. Qiao, Z. Hou, Y. Liu, Y. Xiao, H. Guo, *J. Am. Chem. Soc.*, **2015**, 137, 4316-4319.

<sup>12</sup> S. Jayakumar, S. Muthusamy, M. j Prakash, V. Kesavan, *Eur. J. Org. Chem.*, **2014**, 1893-1898.

<sup>13</sup> S. Kayal, S. Mukherjee, *Org. Lett.*, **2017**, 19, 4944-4947.

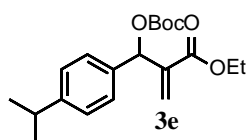

**ethyl 2-(((tert-butoxycarbonyl)oxy)(4-isopropylphenyl)methyl)acrylate (3e):**

Known compound<sup>13</sup>

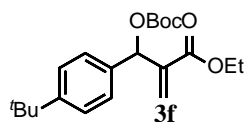

**ethyl 2-(((tert-butoxycarbonyl)oxy)(4-(tert-butyl)phenyl)methyl)acrylate (3f):**

<sup>1</sup>H NMR (300 MHz, Chloroform-d, 298 K)  $\delta$  7.39 – 7.27 (m, 4H), 6.47 (s, 1H), 6.39 (s, 1H), 5.89 (s, 1H), 4.23 – 4.10 (m, 2H), 1.46 (s, 9H), 1.30 (s, 9H), 1.23 (t, J = 7.1, 3H) ppm.

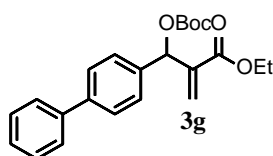

**ethyl 2-([1,1'-biphenyl]-4-yl((tert-butoxycarbonyl)oxy)methyl)acrylate (3g):**

<sup>1</sup>H NMR (300 MHz, Chloroform-d, 298 K)  $\delta$  7.57 – 7.49 (m, 4H), 7.45 (d, J = 8.0 Hz, 2H), 7.38 (t, J = 7.5 Hz, 2H), 7.30 (d, J = 7.1 Hz, 1H), 6.52 (s, 1H), 6.40 (s, 1H), 5.92 (s, 1H), 4.14 (d, J = 7.2 Hz, 2H), 1.44 (s, 9H), 1.20 (t, J = 7.2 Hz, 3H) ppm.

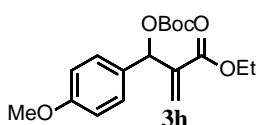

**ethyl 2-(((tert-butoxycarbonyl)oxy)(4-methoxyphenyl)methyl)acrylate (3h):**

Known compound<sup>13</sup>

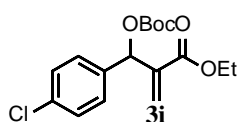

**ethyl 2-(((tert-butoxycarbonyl)oxy)(4-chlorophenyl)methyl)acrylate (3i):**

Known compound<sup>13</sup>

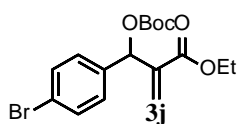

**ethyl 2-((4-bromophenyl)((tert-butoxycarbonyl)oxy)methyl)acrylate (3j):**

Known compound<sup>13</sup>

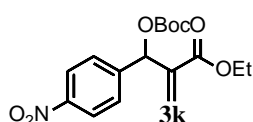

**ethyl 2-(((tert-butoxycarbonyl)oxy)(4-nitrophenyl)methyl)acrylate (3k):**

<sup>1</sup>H NMR (300 MHz, Chloroform-d, 298 K)  $\delta$  8.18 (d, J = 8.3 Hz, 2H), 7.58 (d, J = 8.3 Hz, 2H), 6.51 (s, 1H), 6.45 (s, 1H), 5.98 (s, 1H), 4.15 (q, J = 7.1 Hz, 2H), 1.44 (s, 9H), 1.22 (t, J = 7.1 Hz, 3H) ppm.

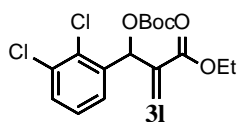

**ethyl 2-(((tert-butoxycarbonyl)oxy)(2,3-dichlorophenyl)methyl)acrylate (3l):**

$^1\text{H NMR}$  (300 MHz, Chloroform-d, 298 K)  $\delta$  7.44 (d,  $J = 7.8$  Hz, 1H), 7.32 (d,  $J = 7.8$  Hz, 1H), 7.21 (t,  $J = 7.8$  Hz, 1H), 6.89 (s, 1H), 6.47 (s, 1H), 5.63 (s, 1H), 4.20 (q,  $J = 7.1$  Hz, 2H), 1.47 (s, 9H), 1.24 (t,  $J = 7.1$  Hz, 3H) ppm.

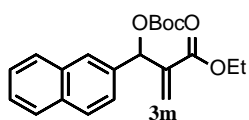

**ethyl 2-(((tert-butoxycarbonyl)oxy)(naphthalen-2-yl)methyl)acrylate (3m):**

Known compound<sup>10</sup>

## 2. Copies of NMR-Spectra

Spectra contain traces of the 2<sup>nd</sup> diastereomer (not integrated!)

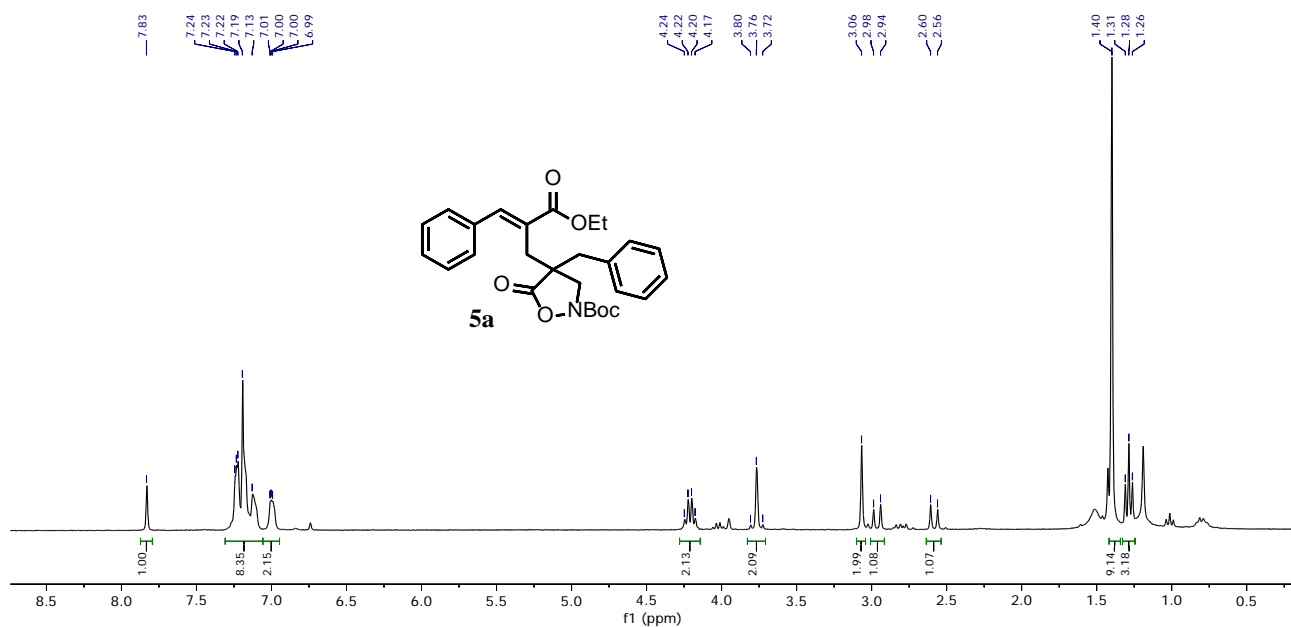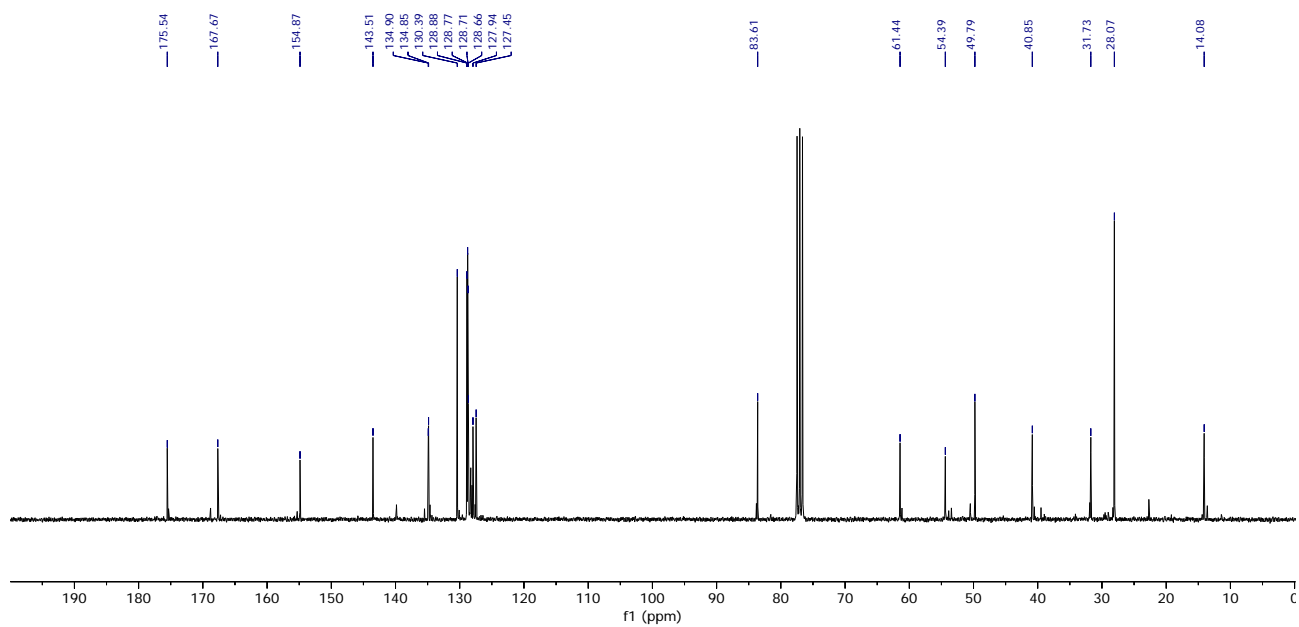

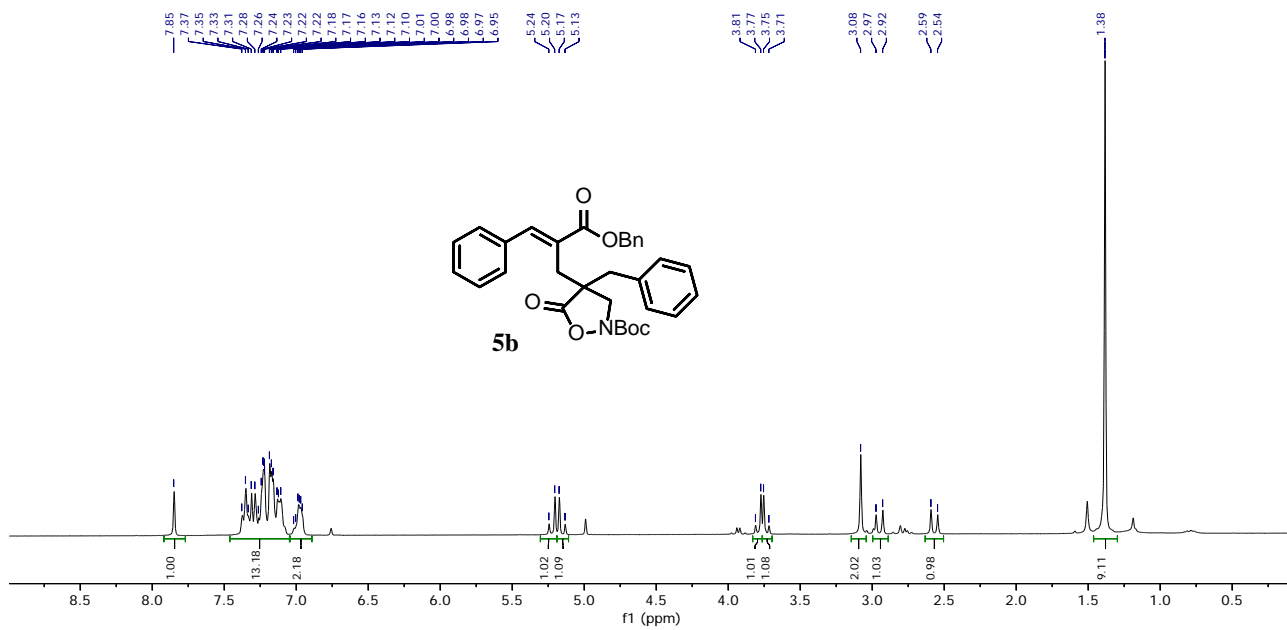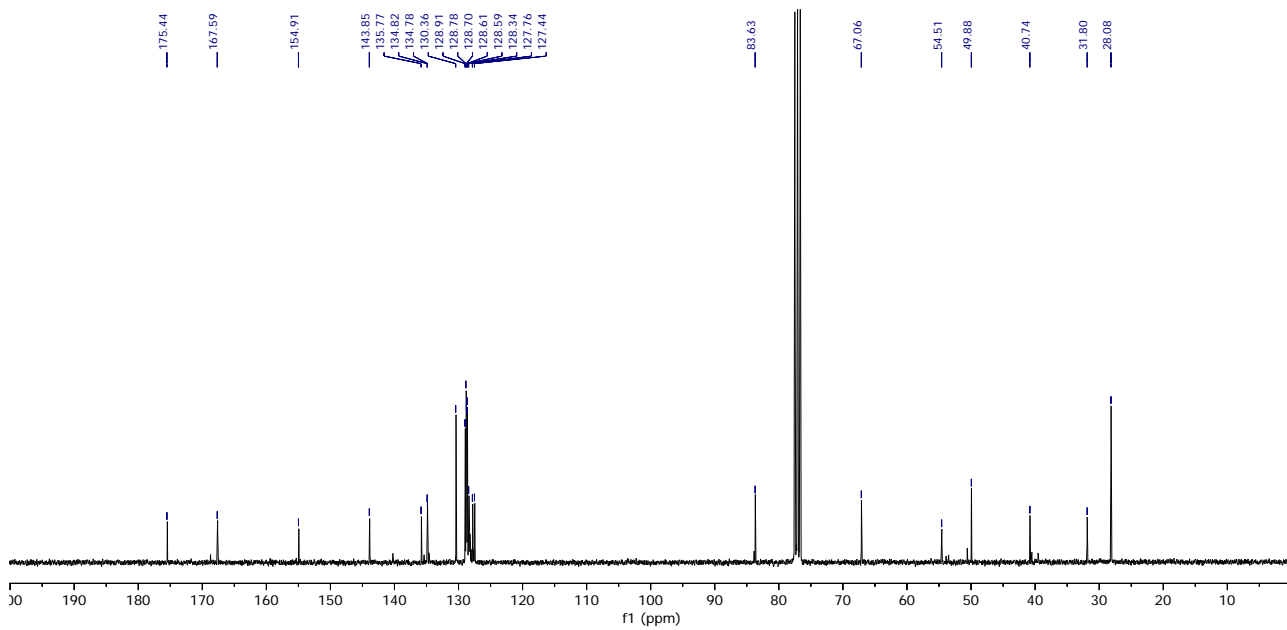

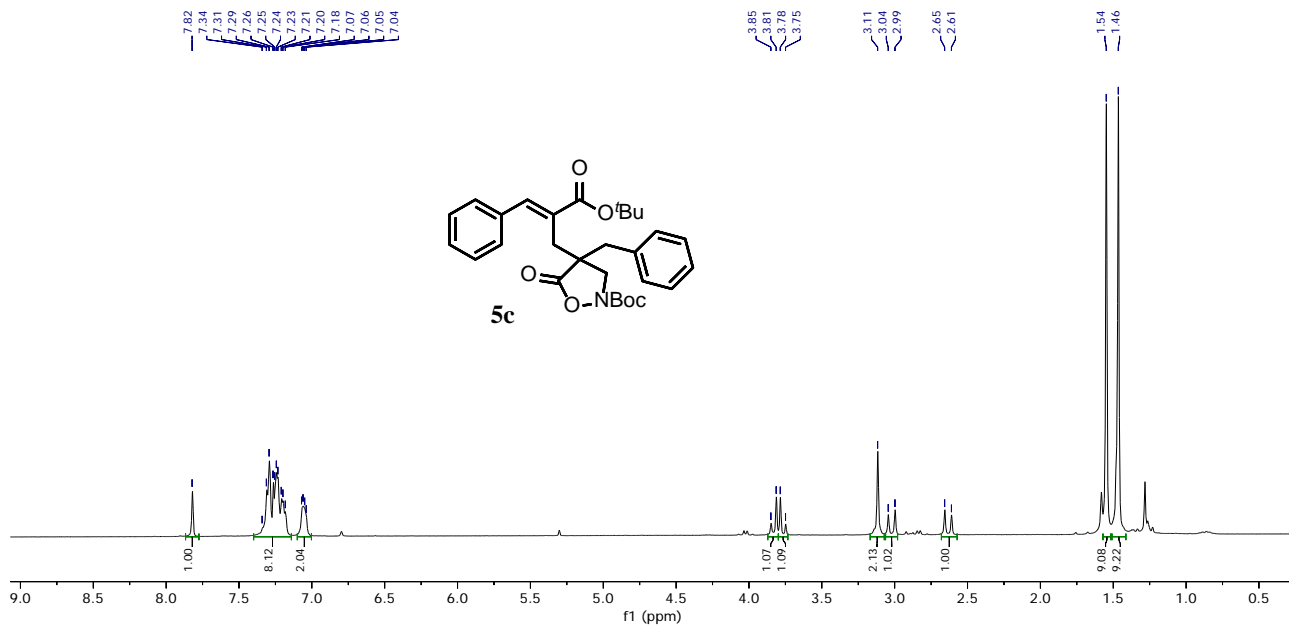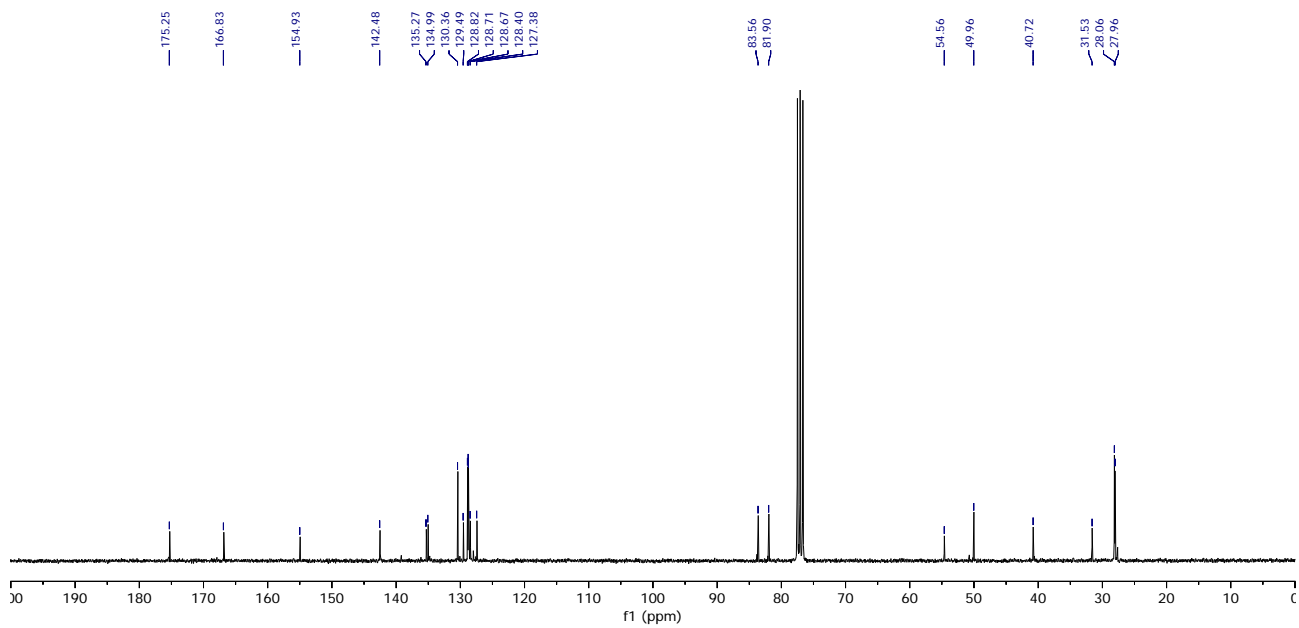



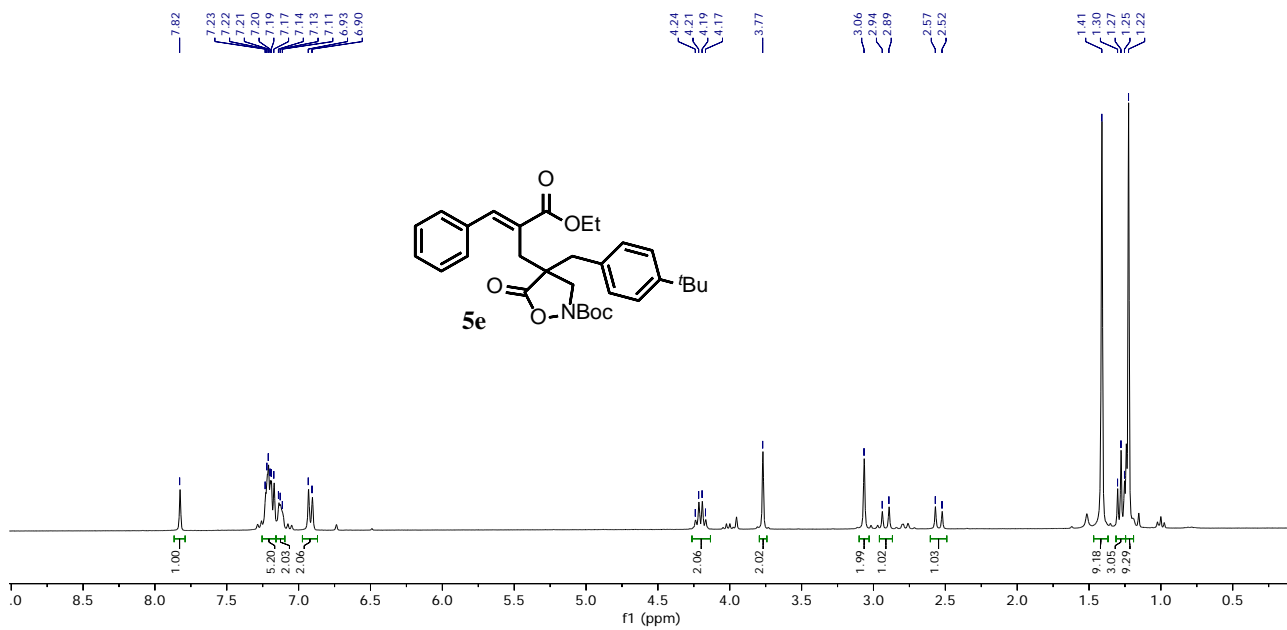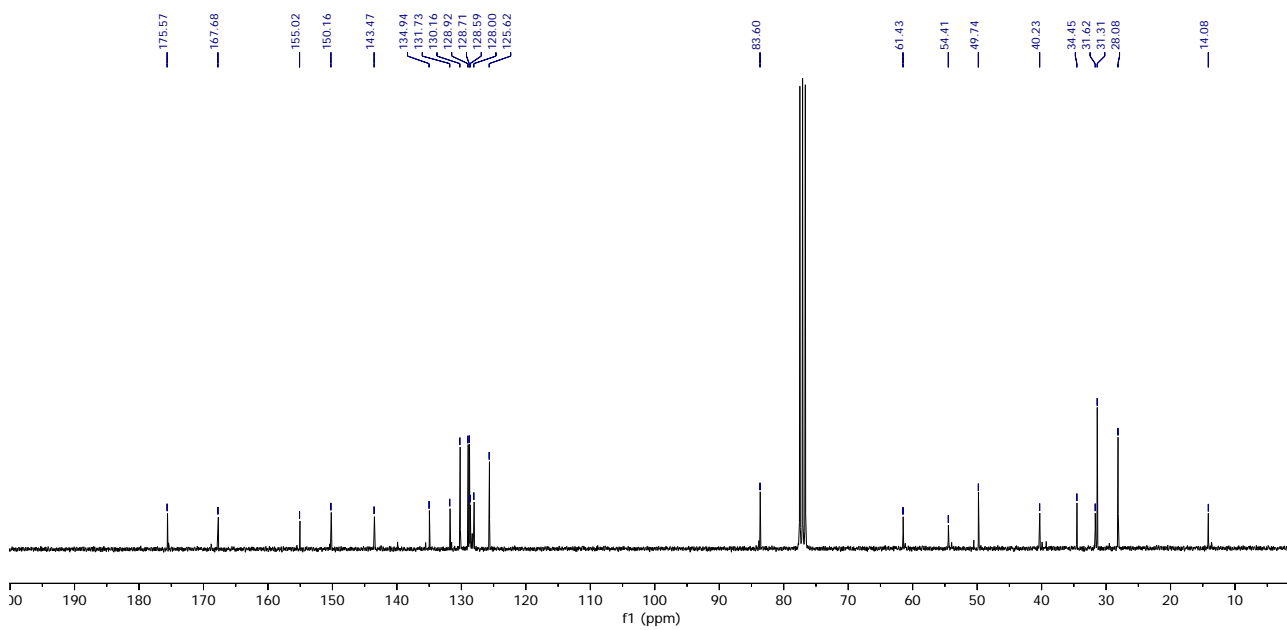





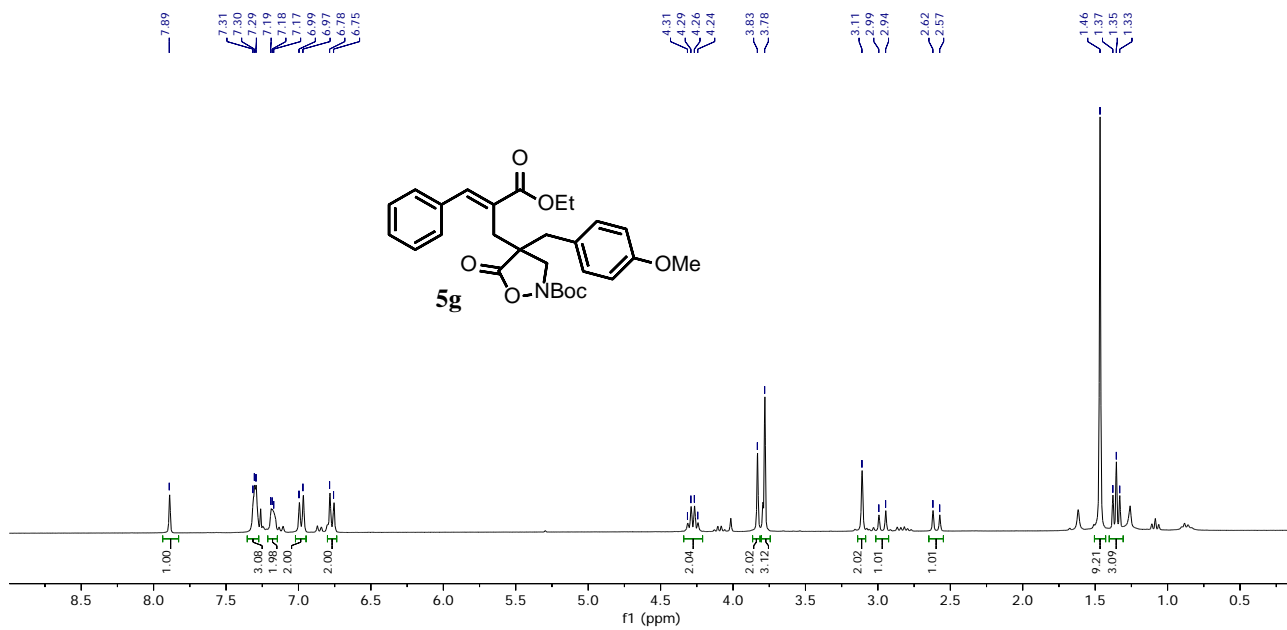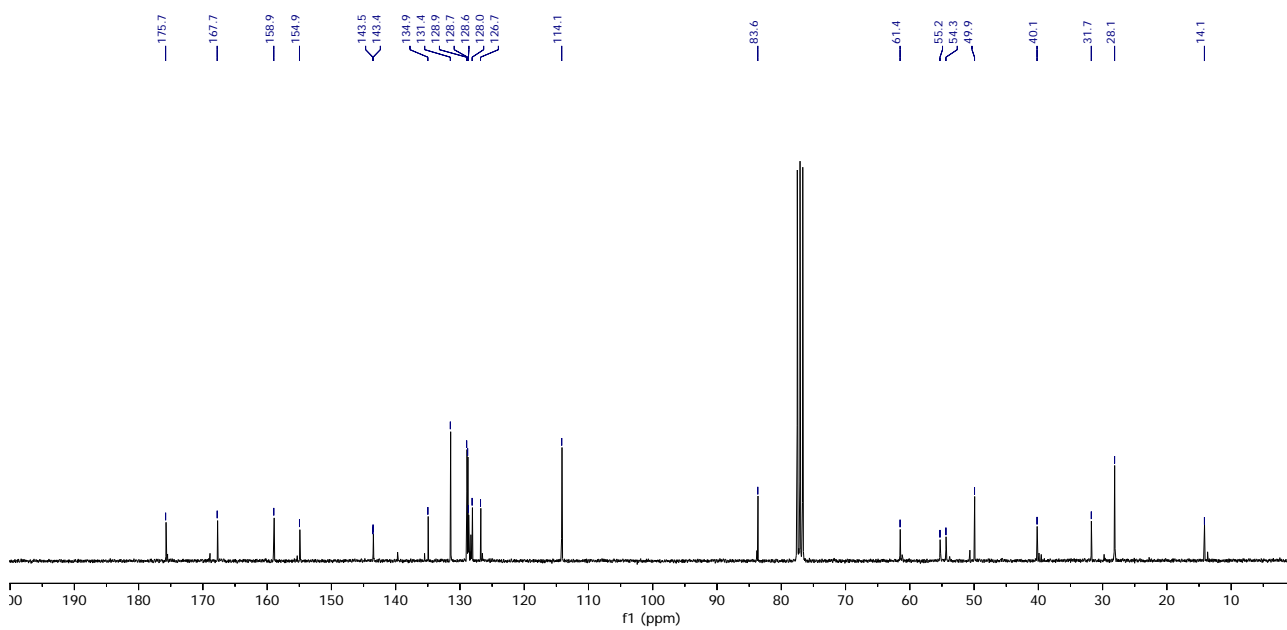

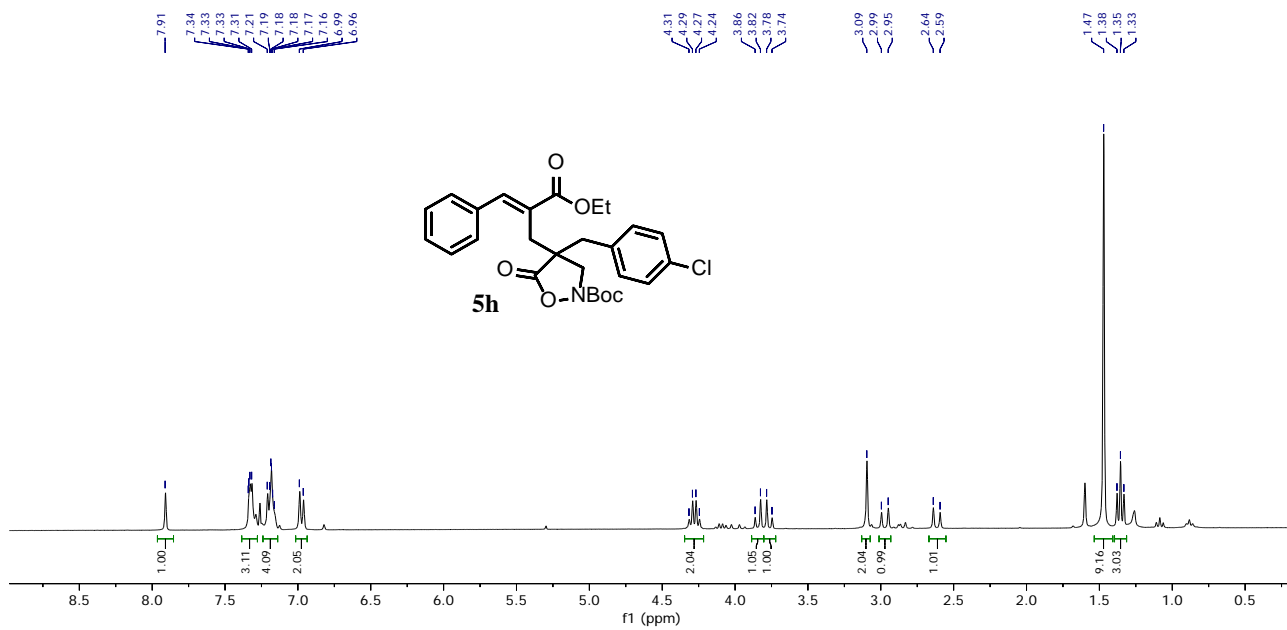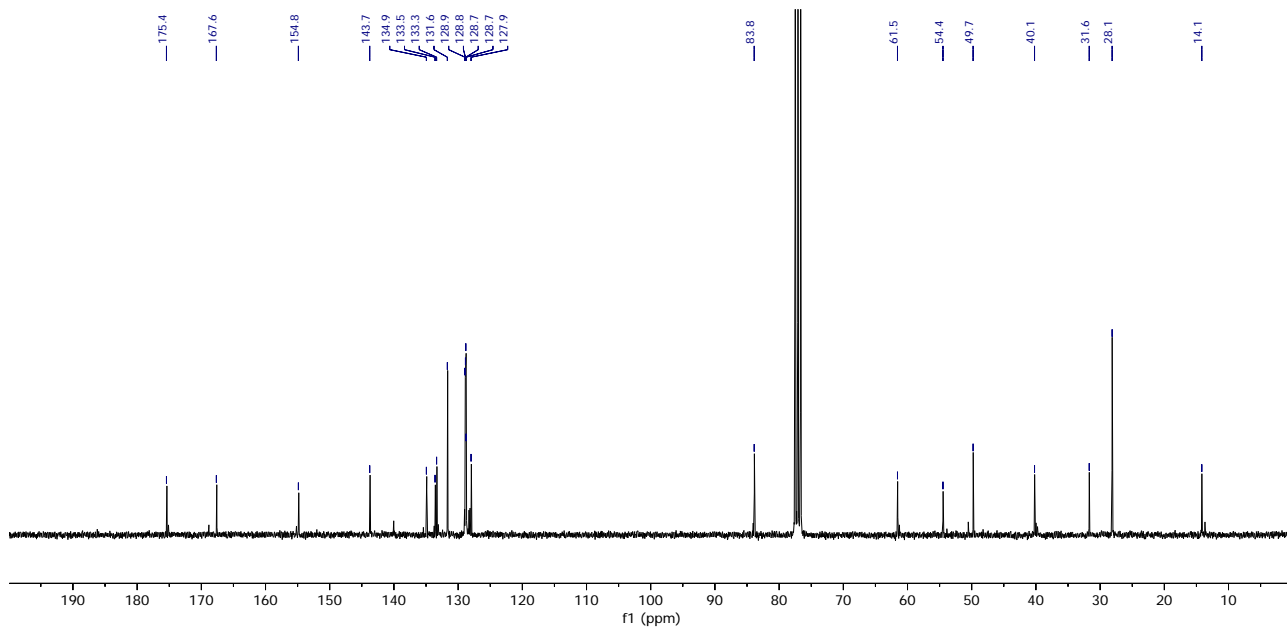

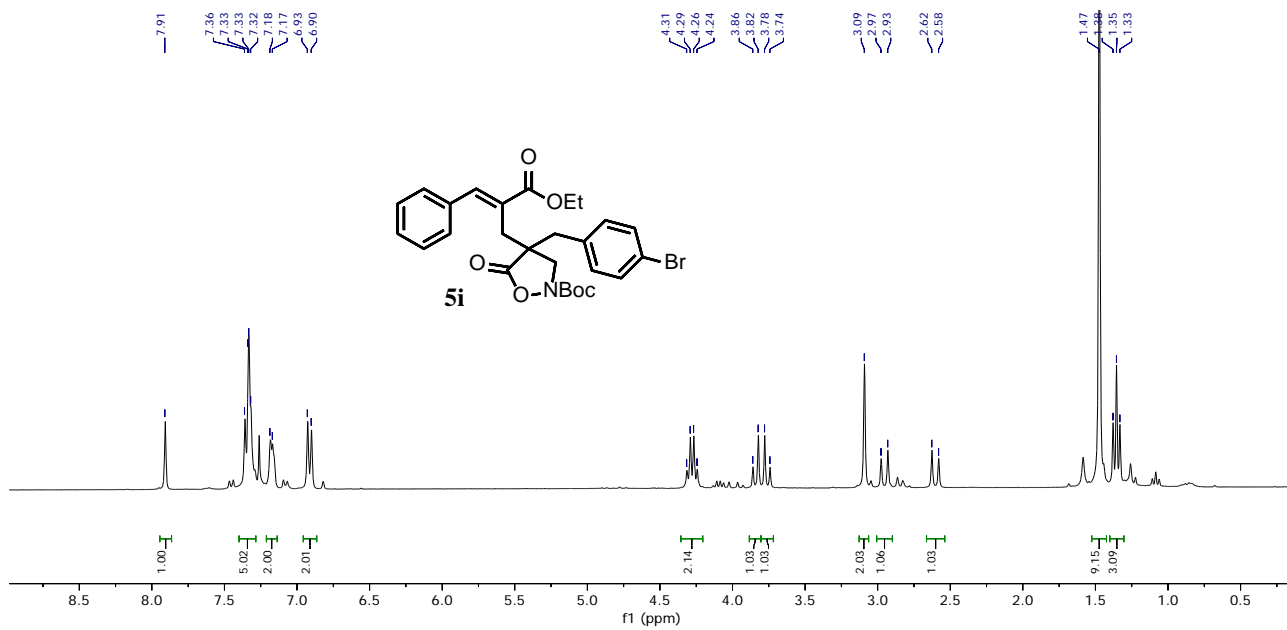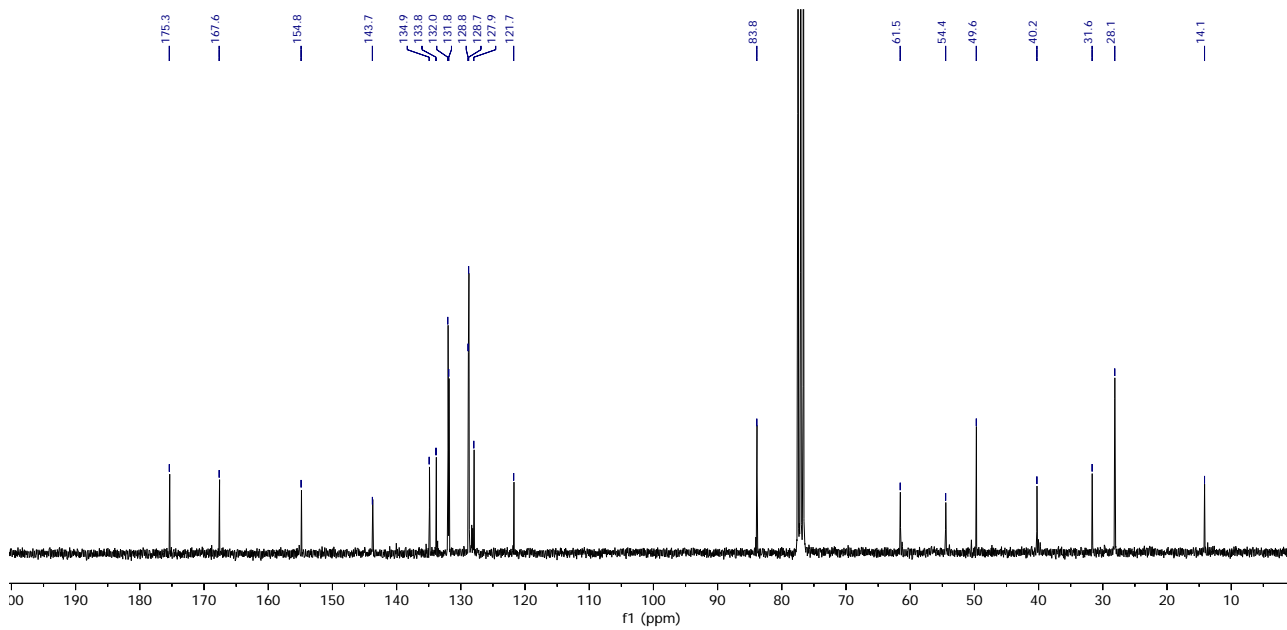

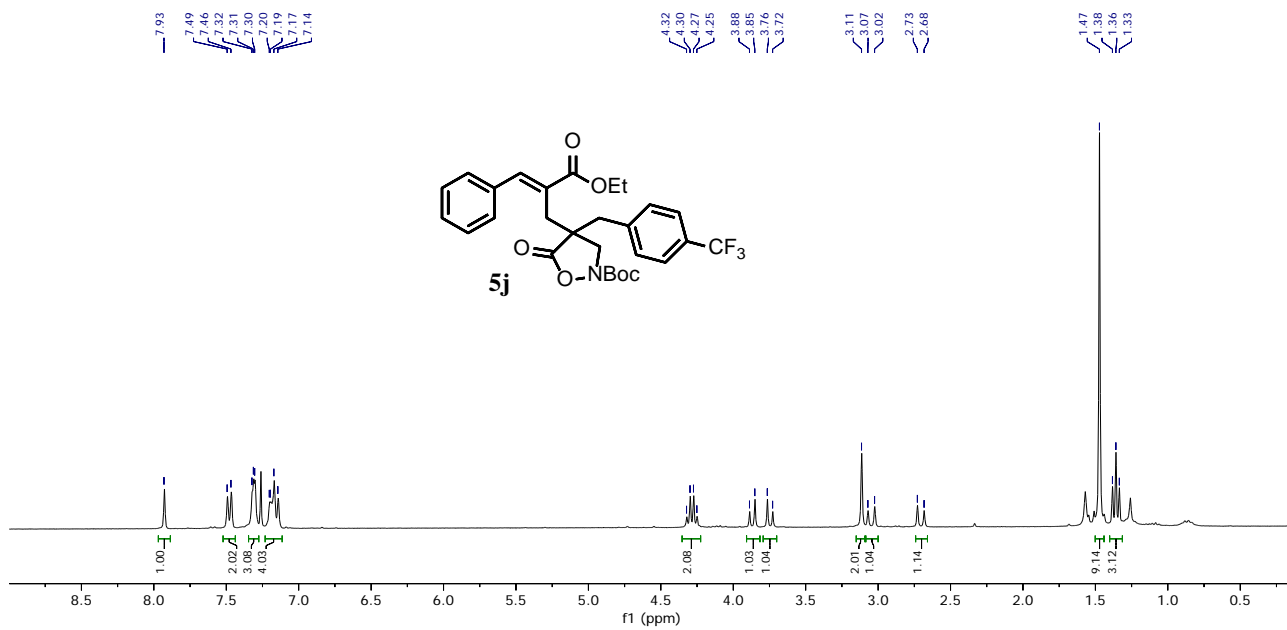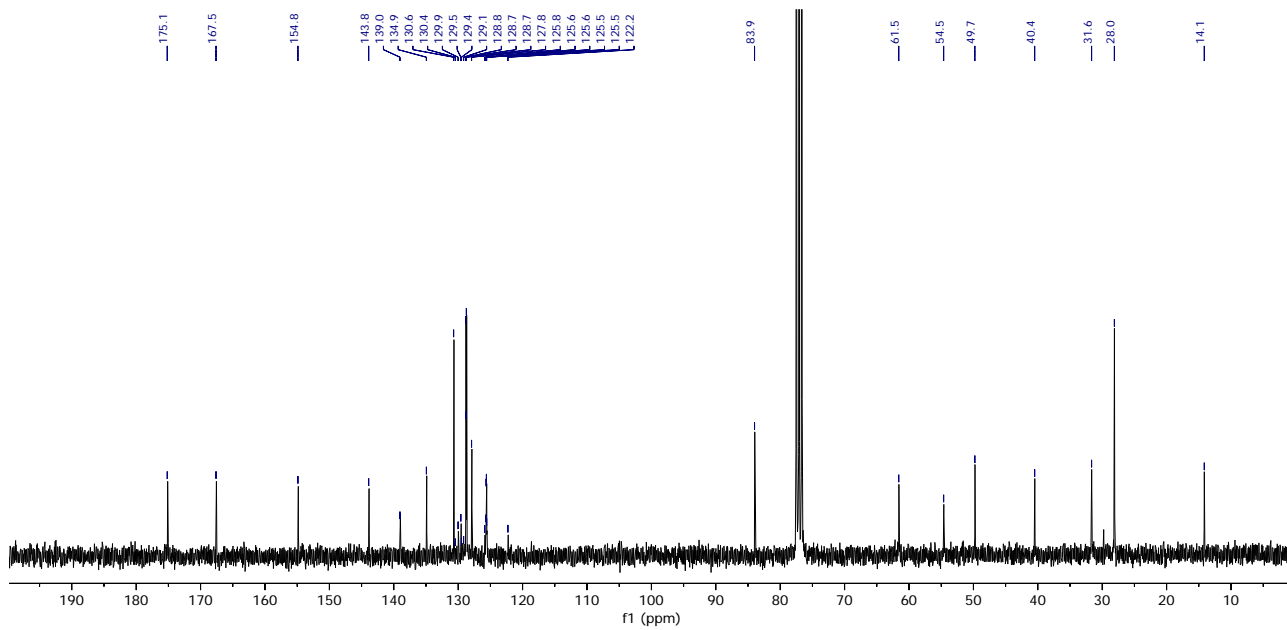

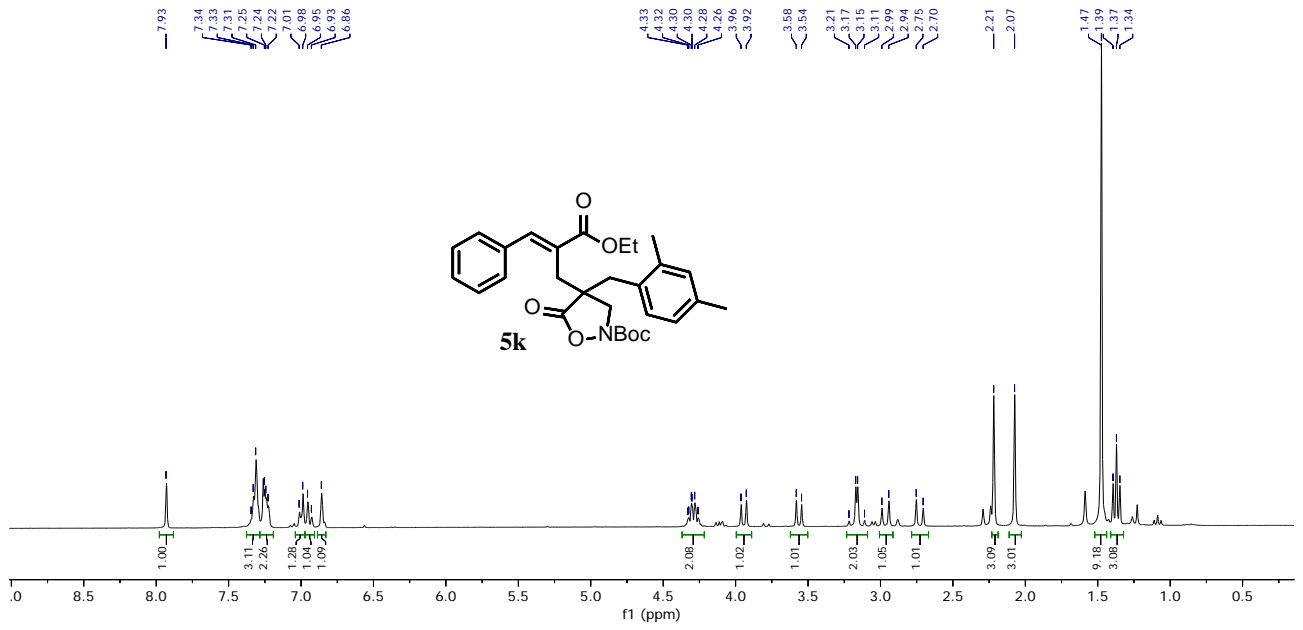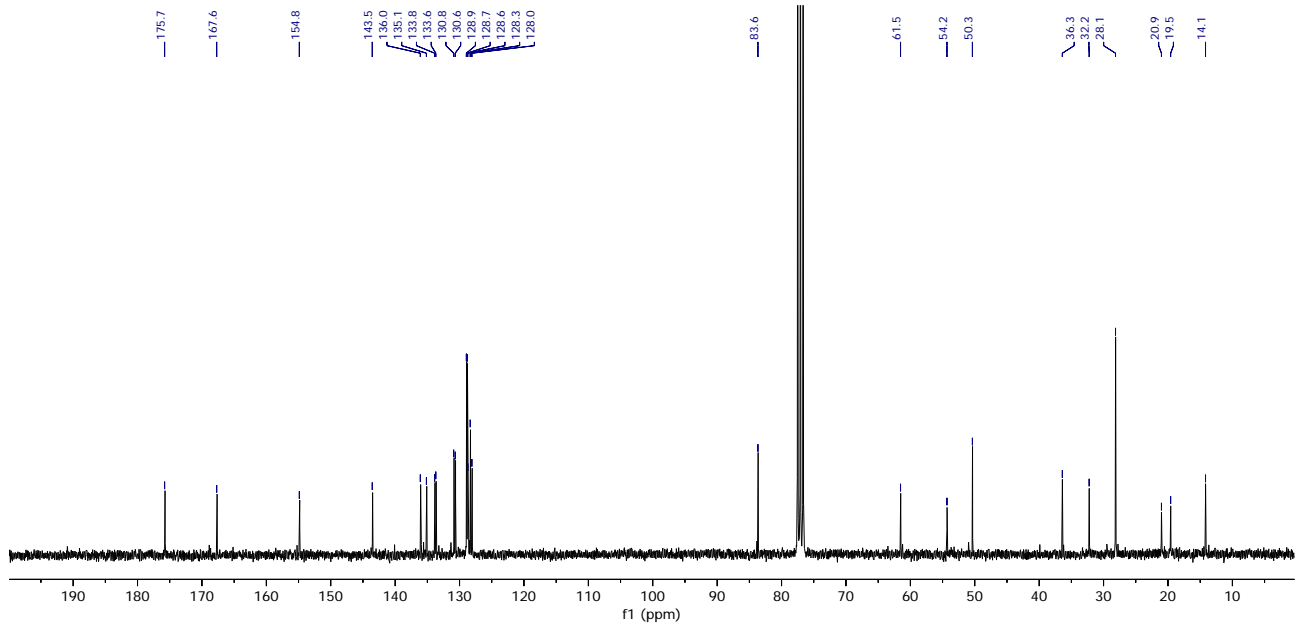

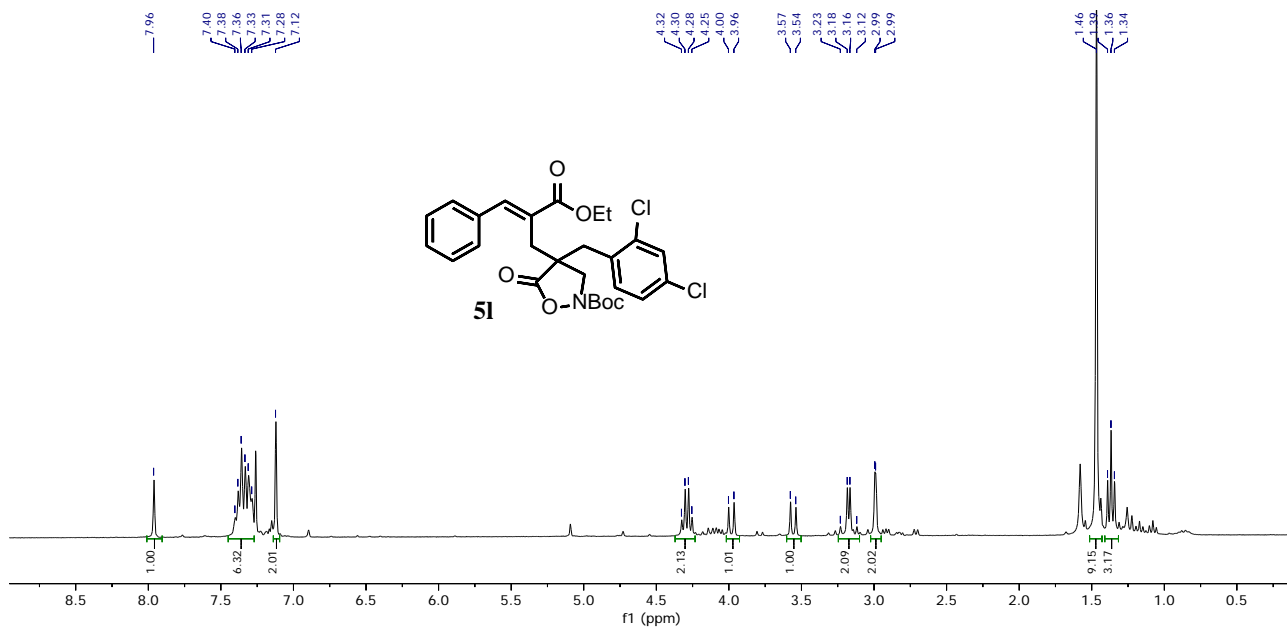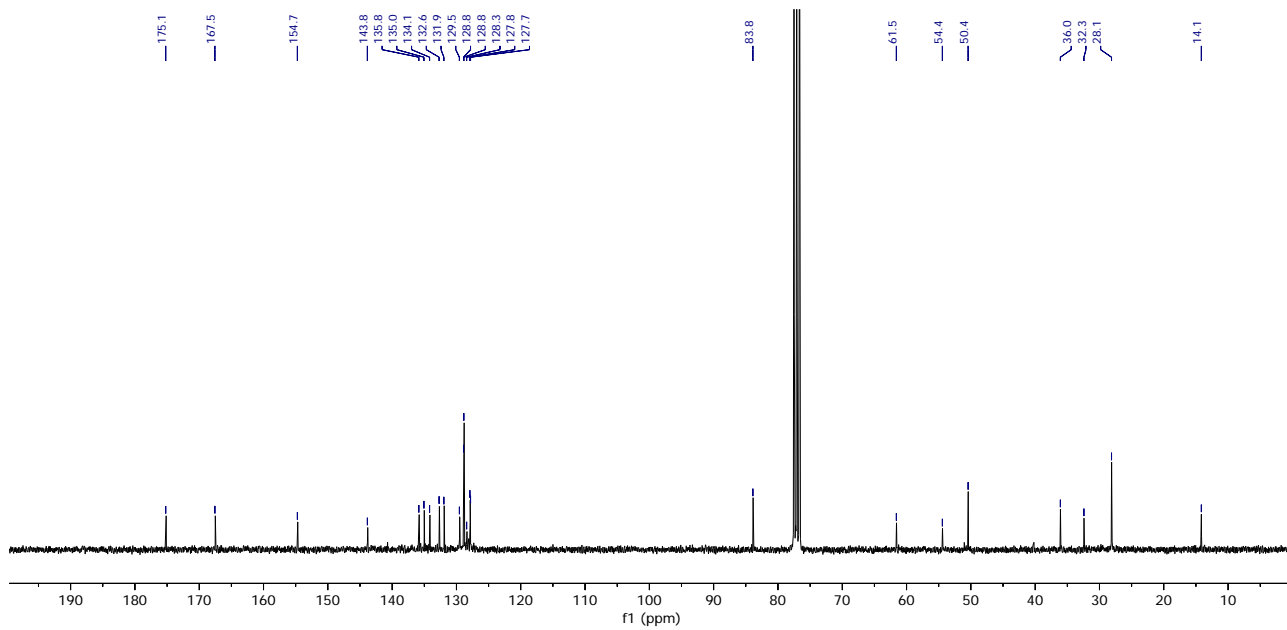

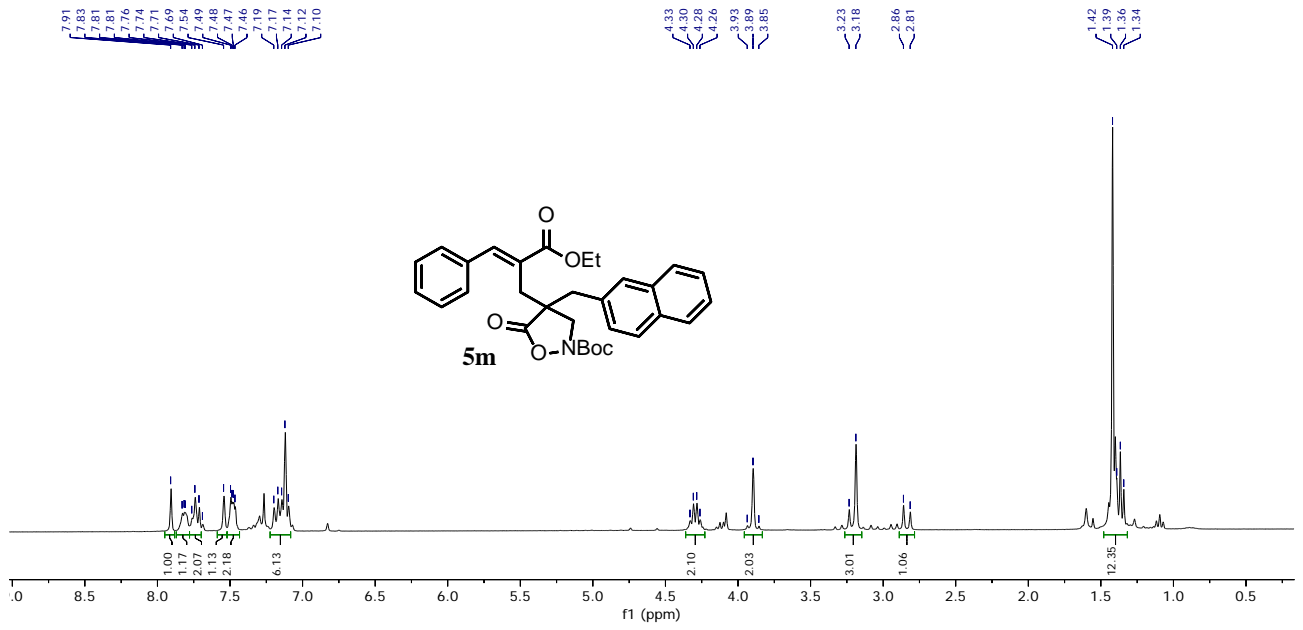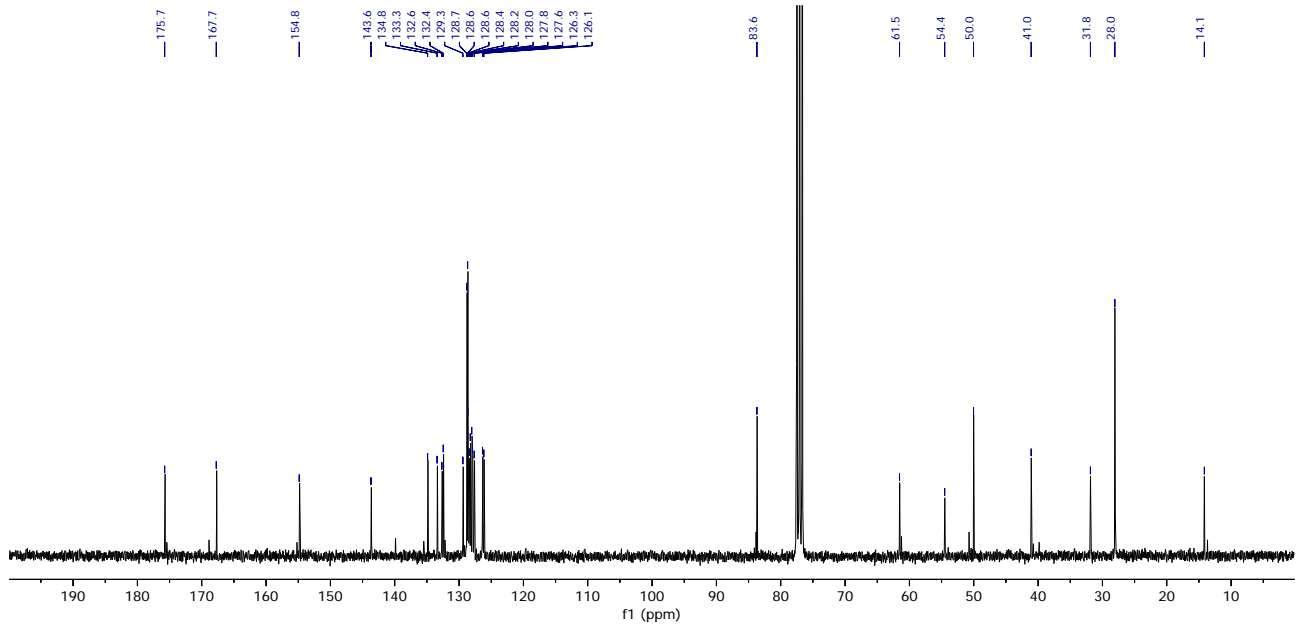



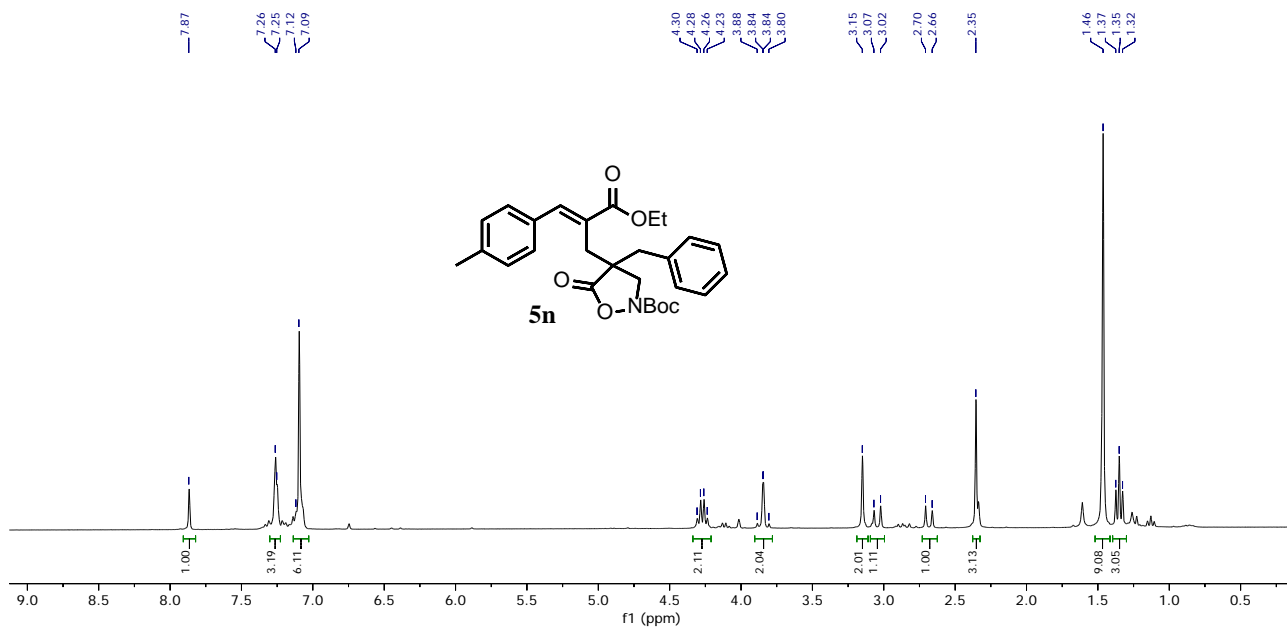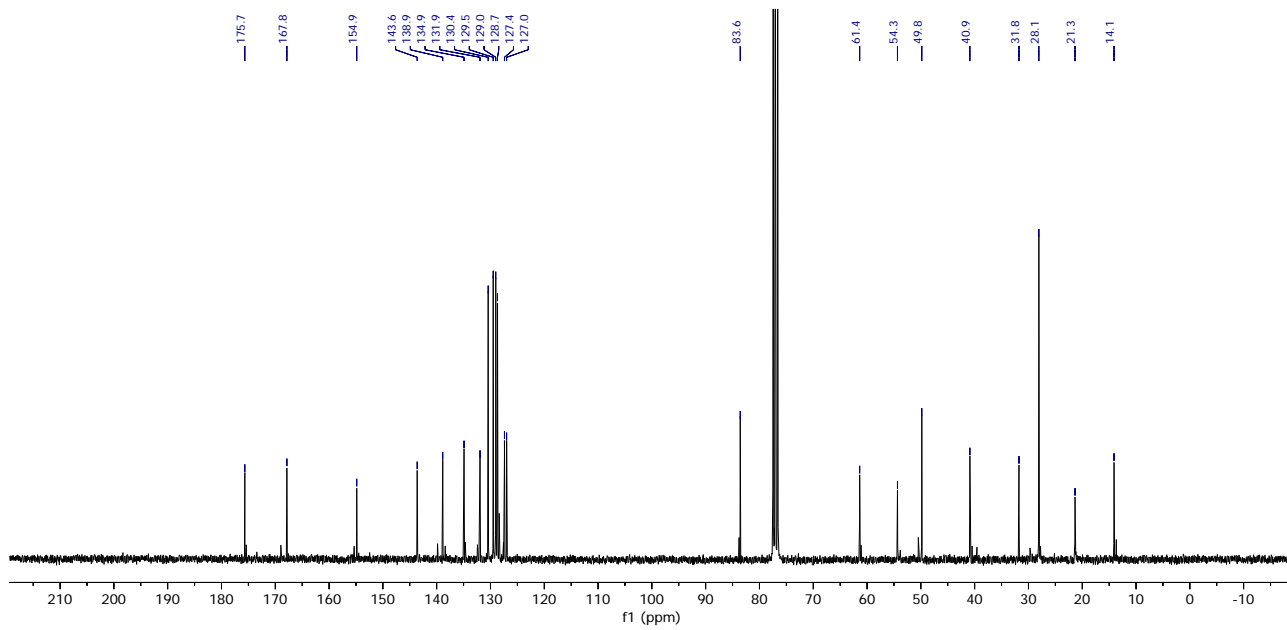

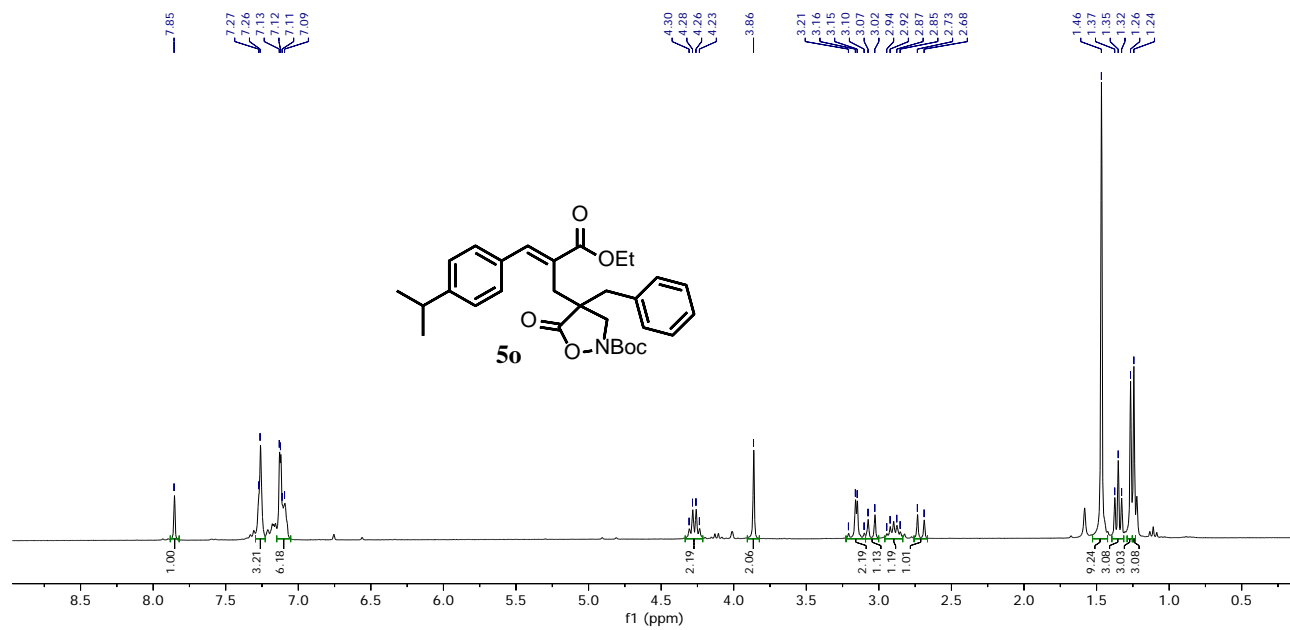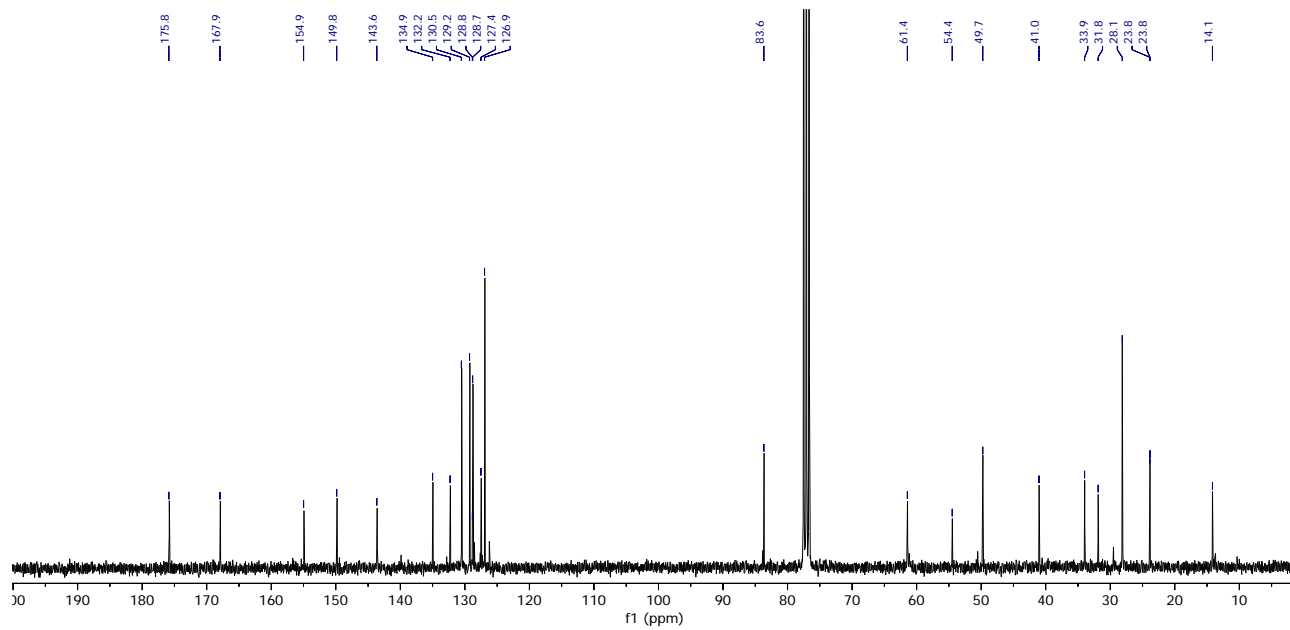

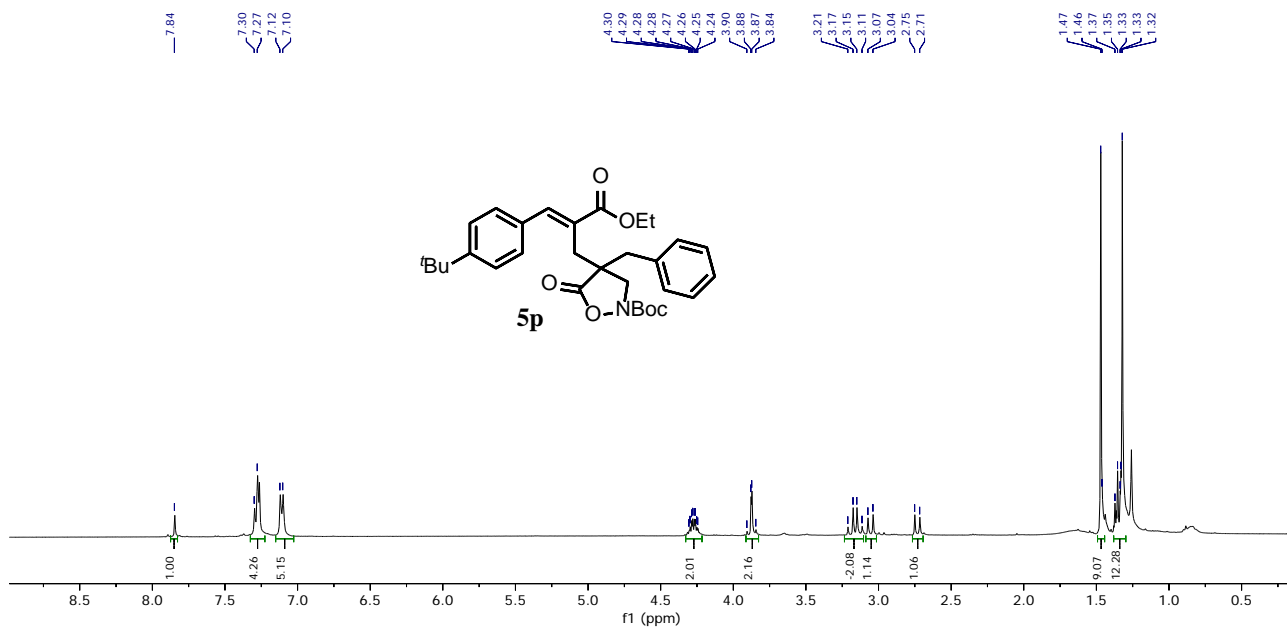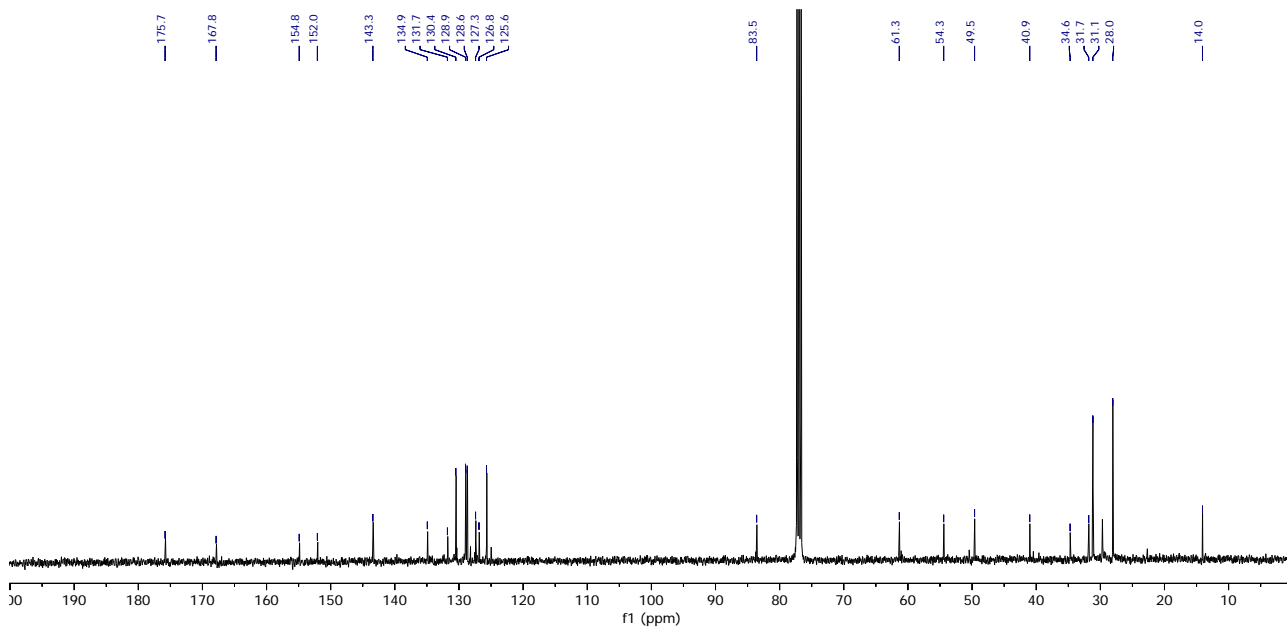

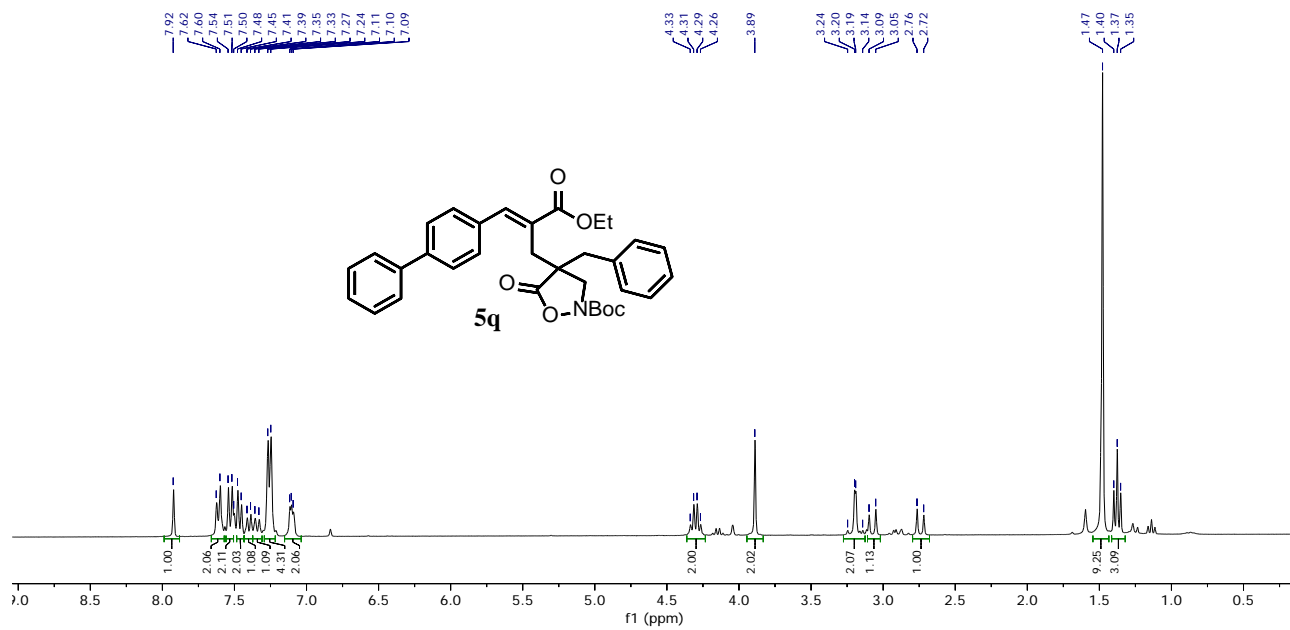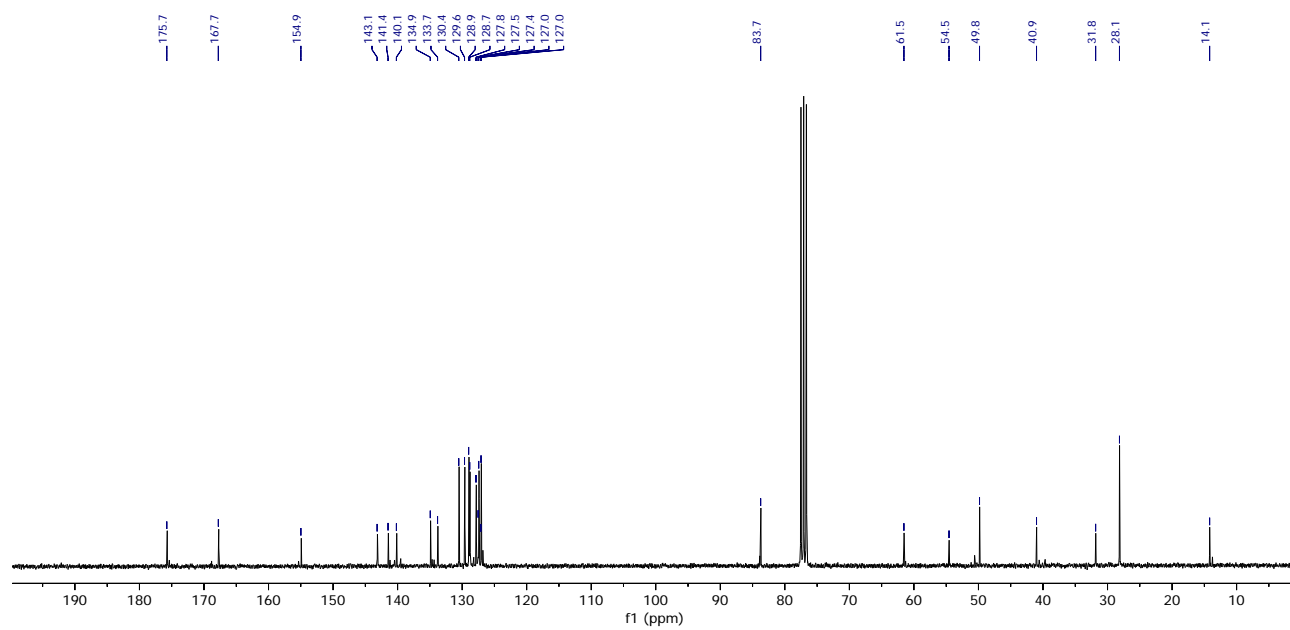

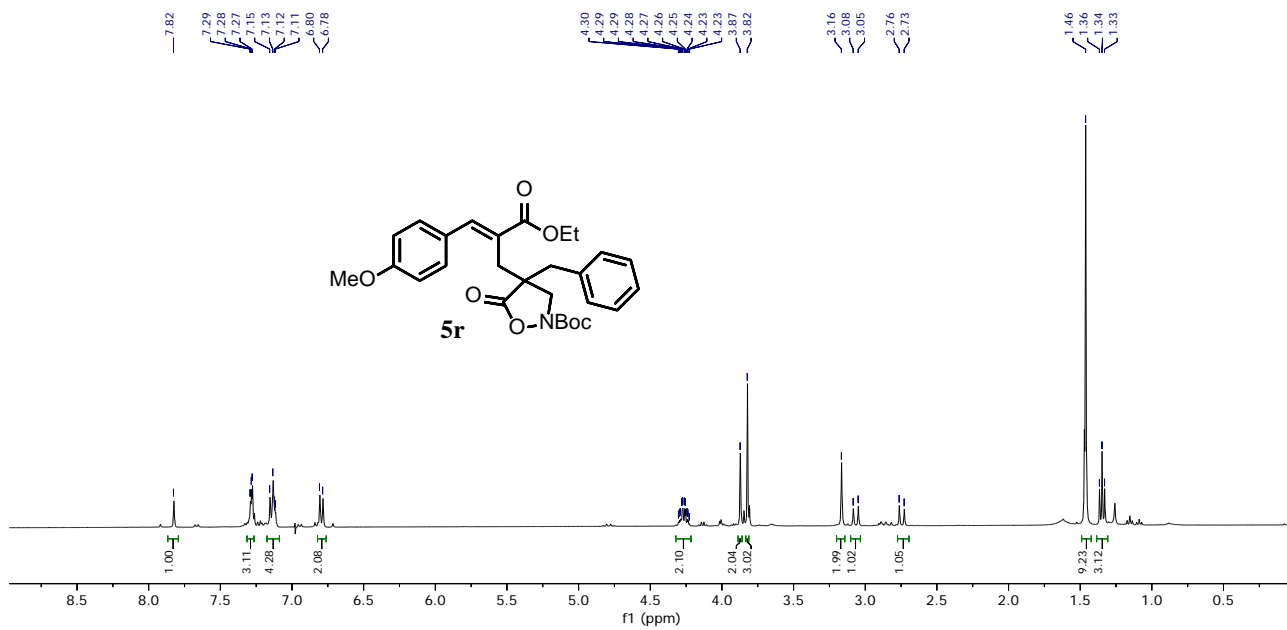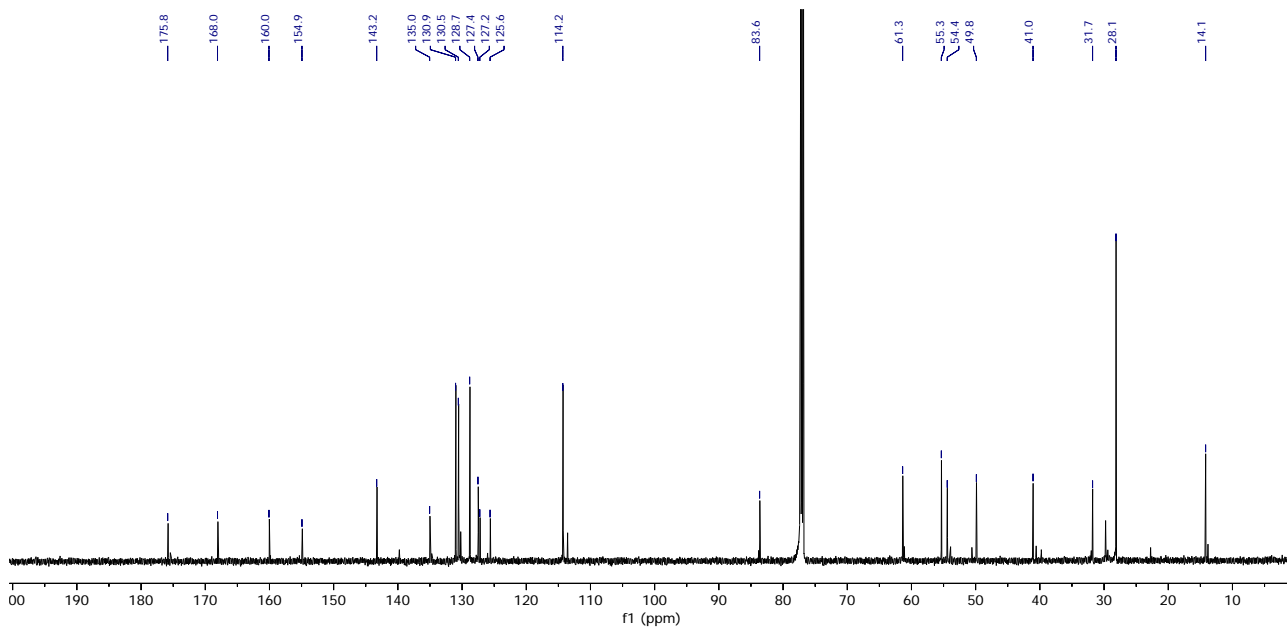

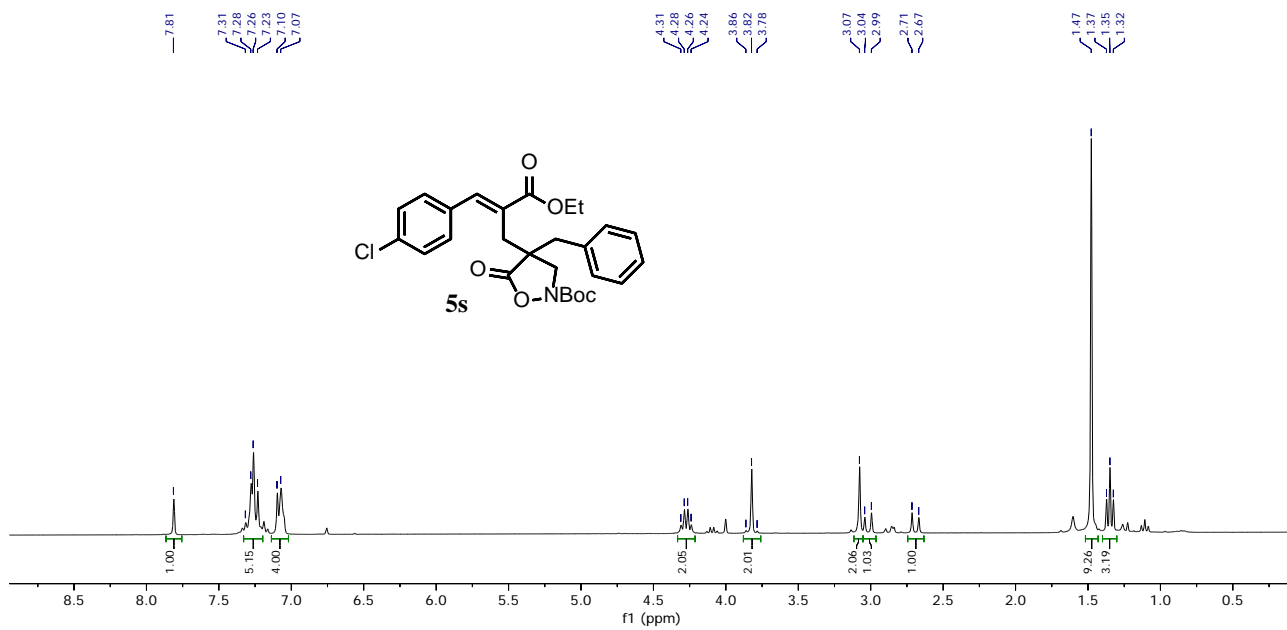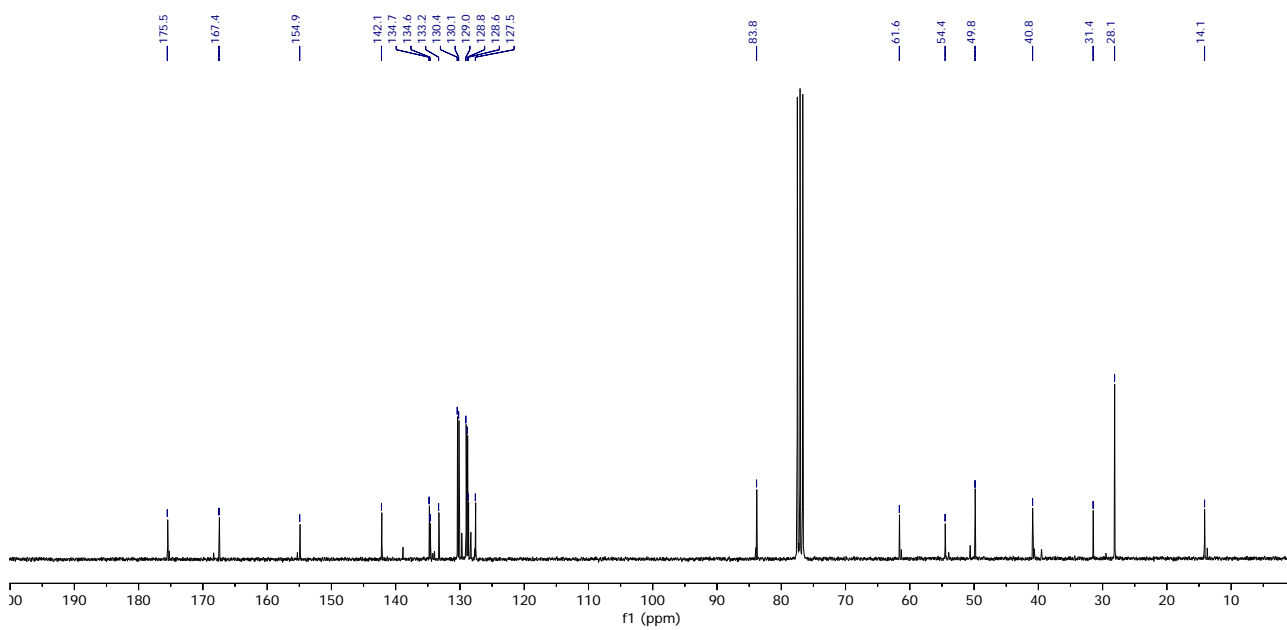

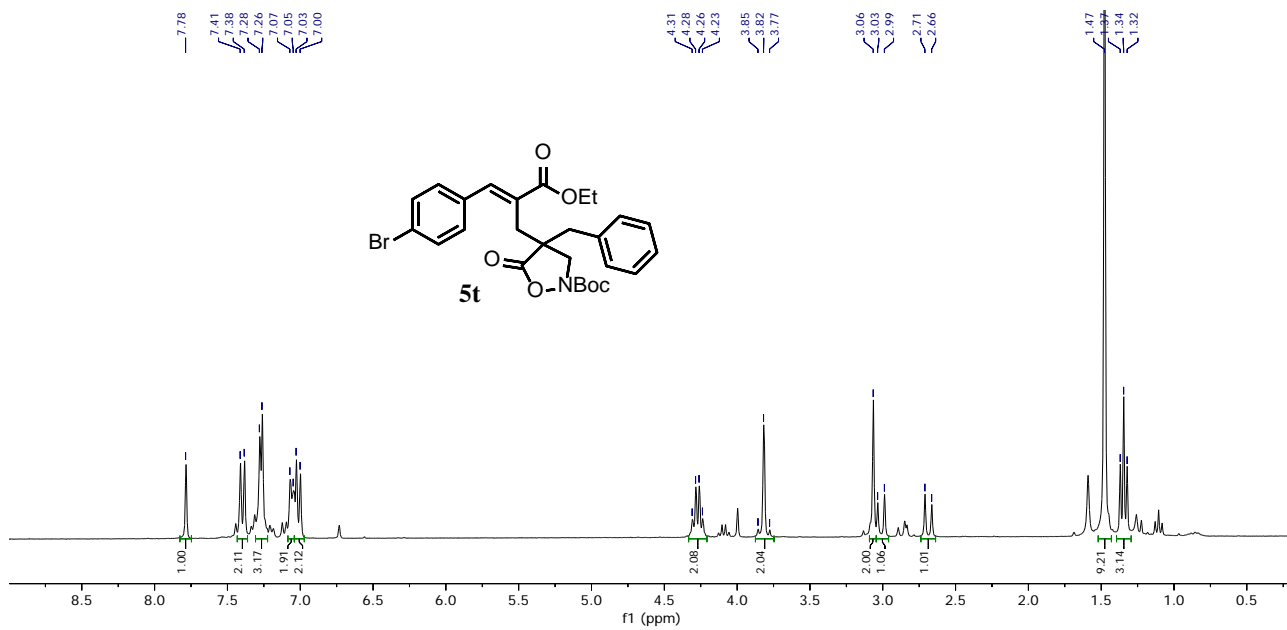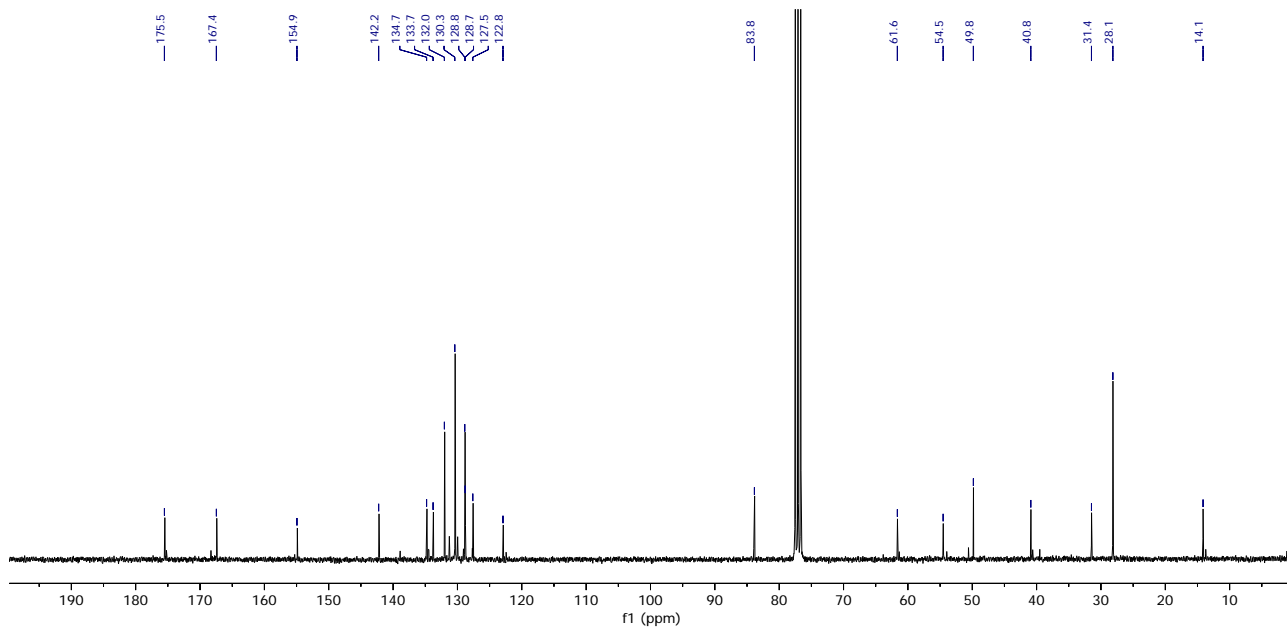

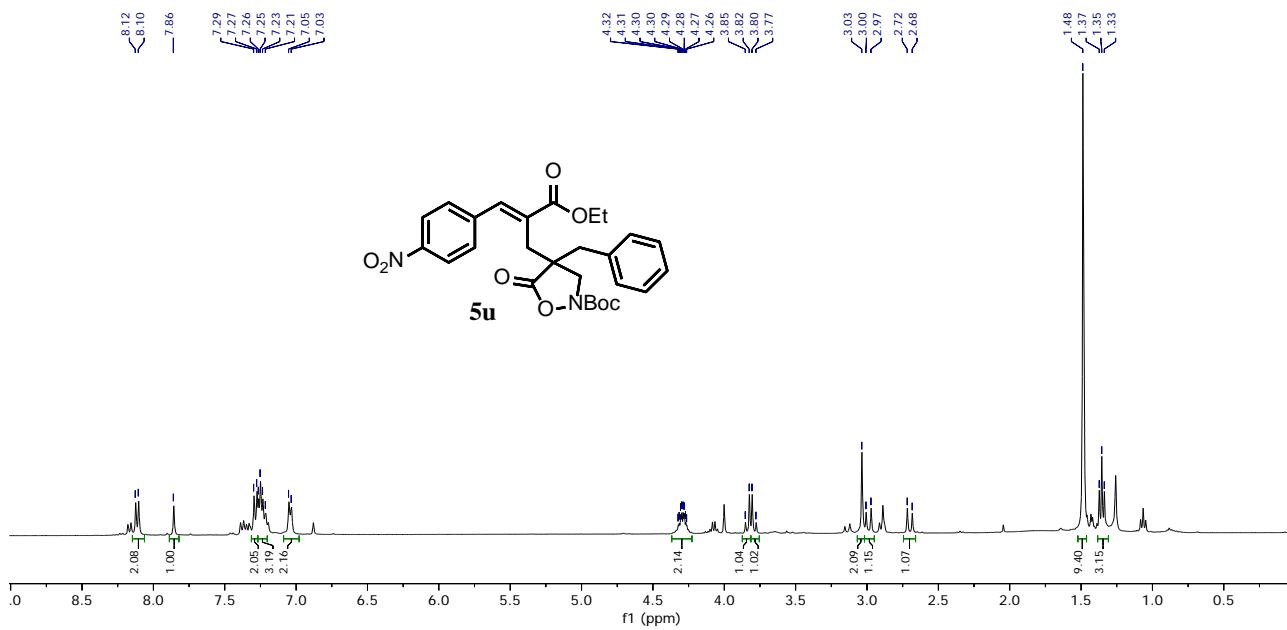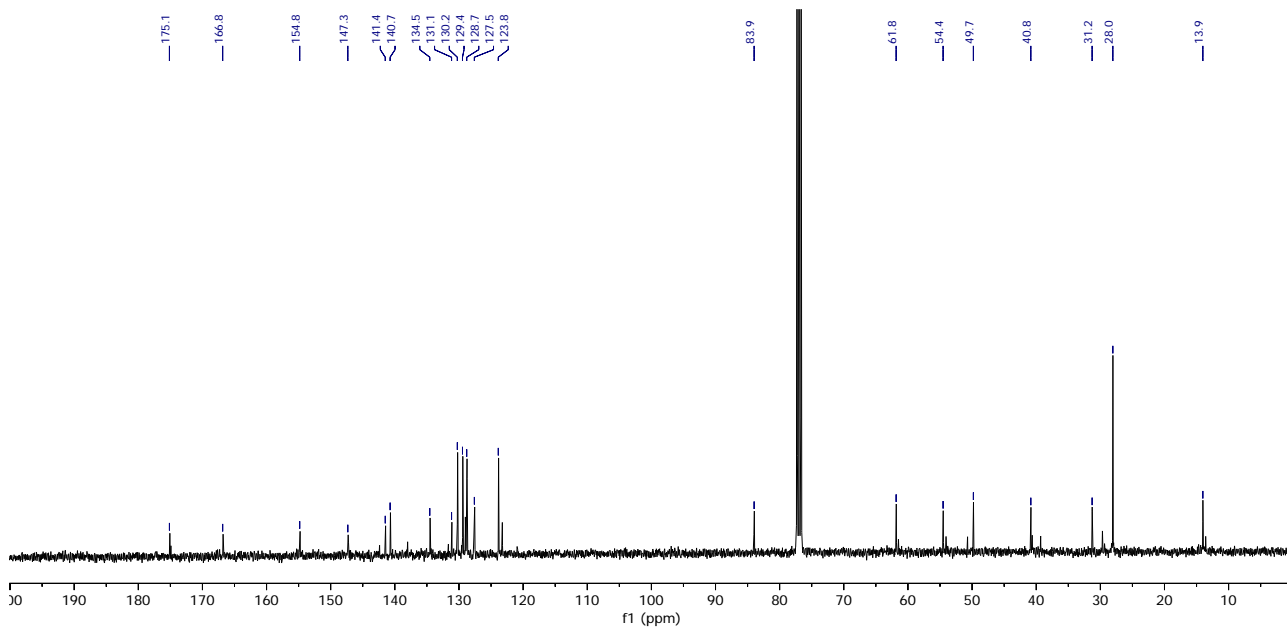



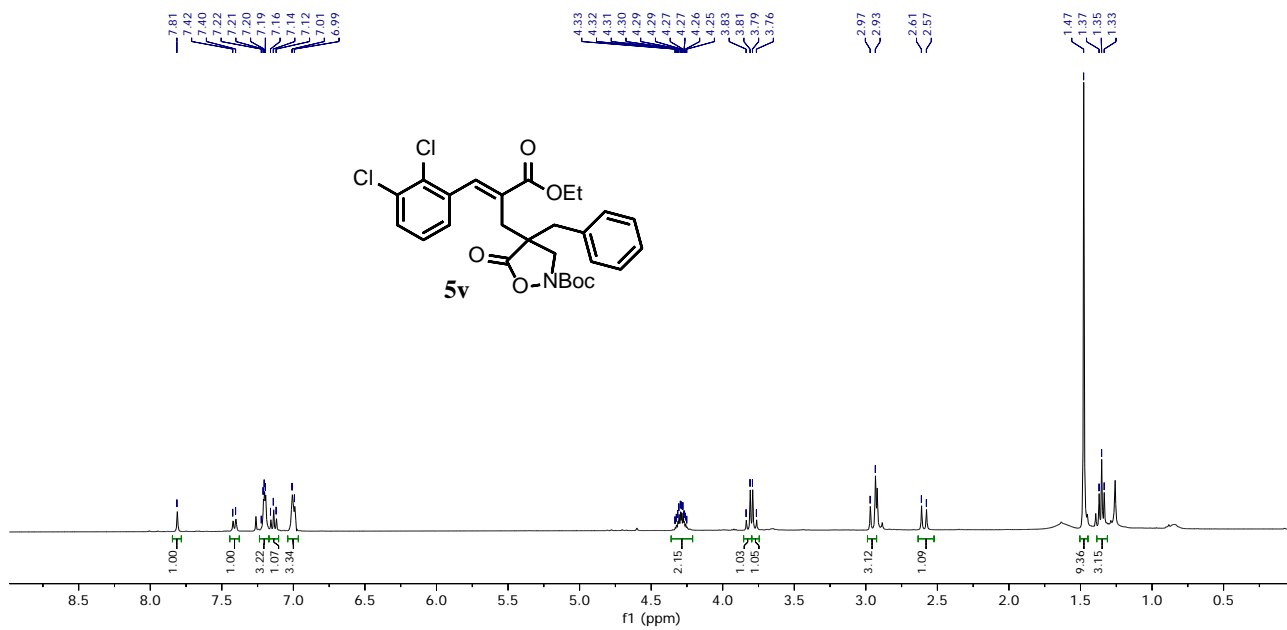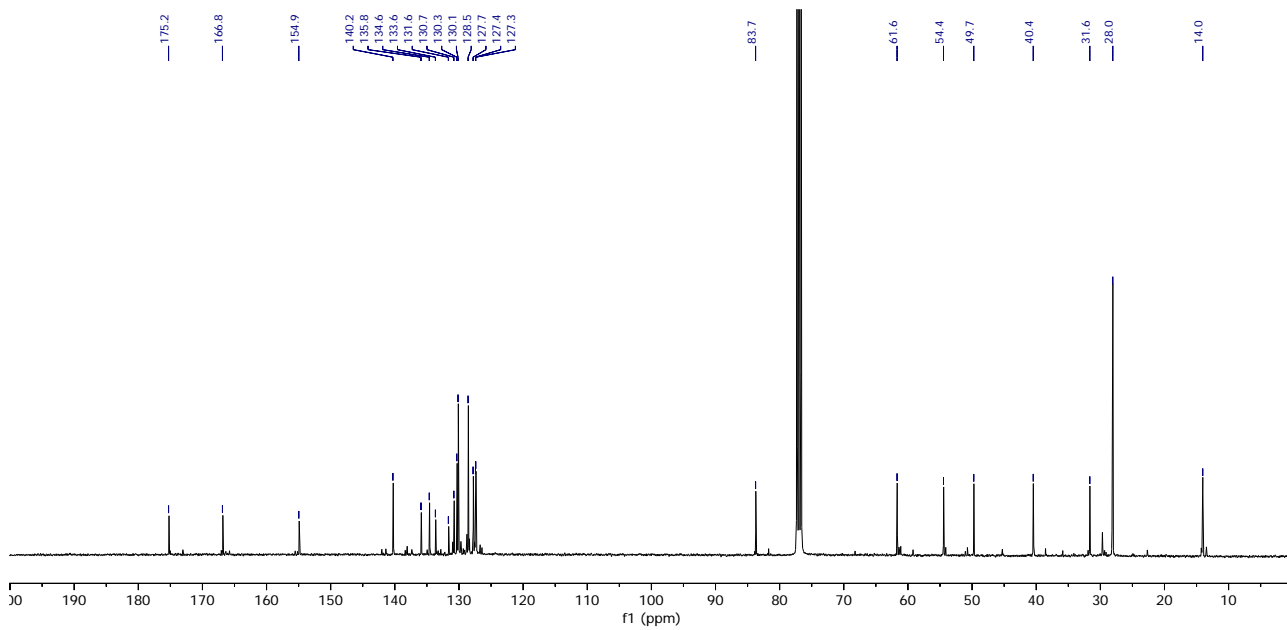

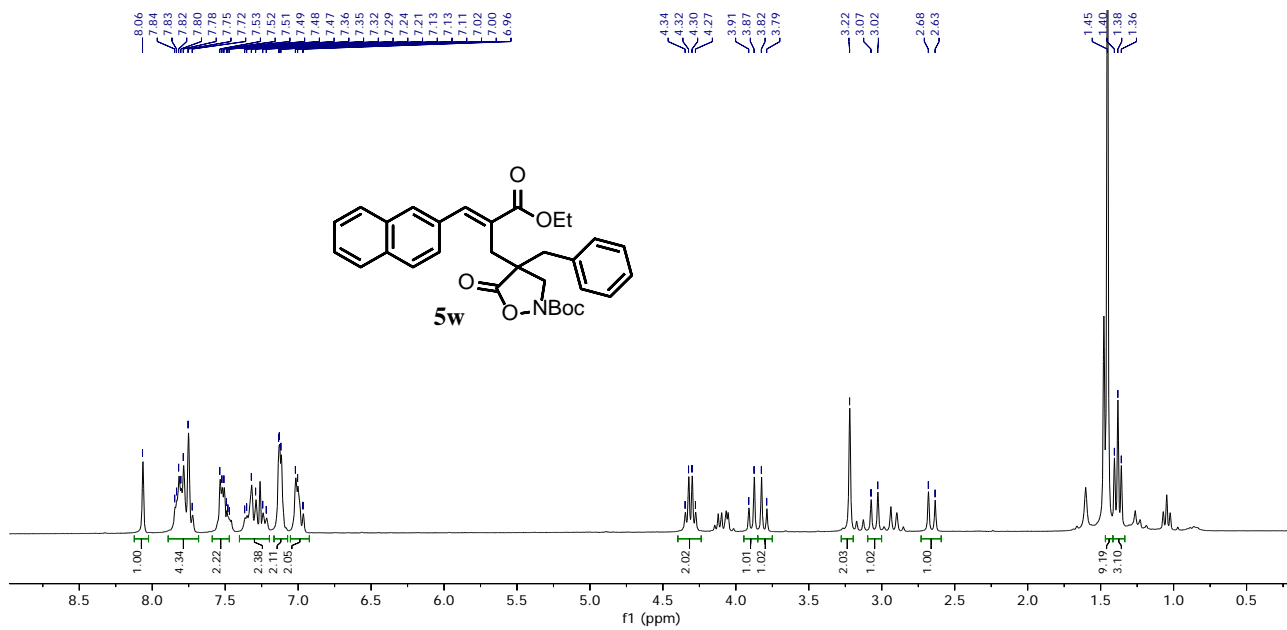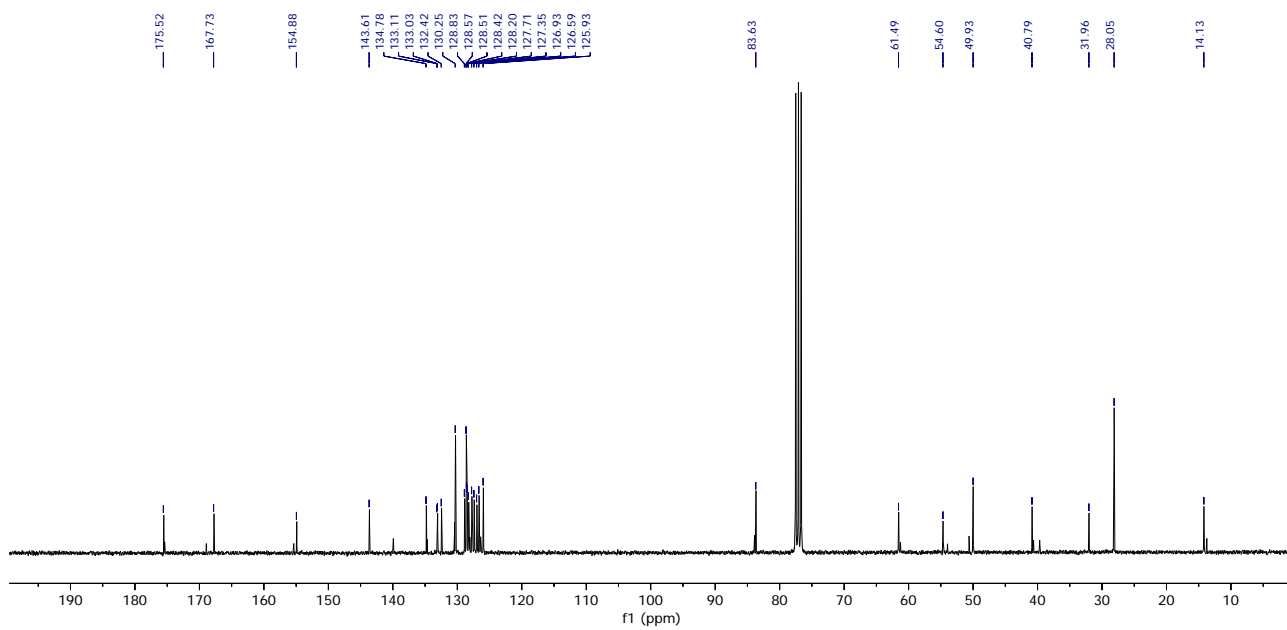

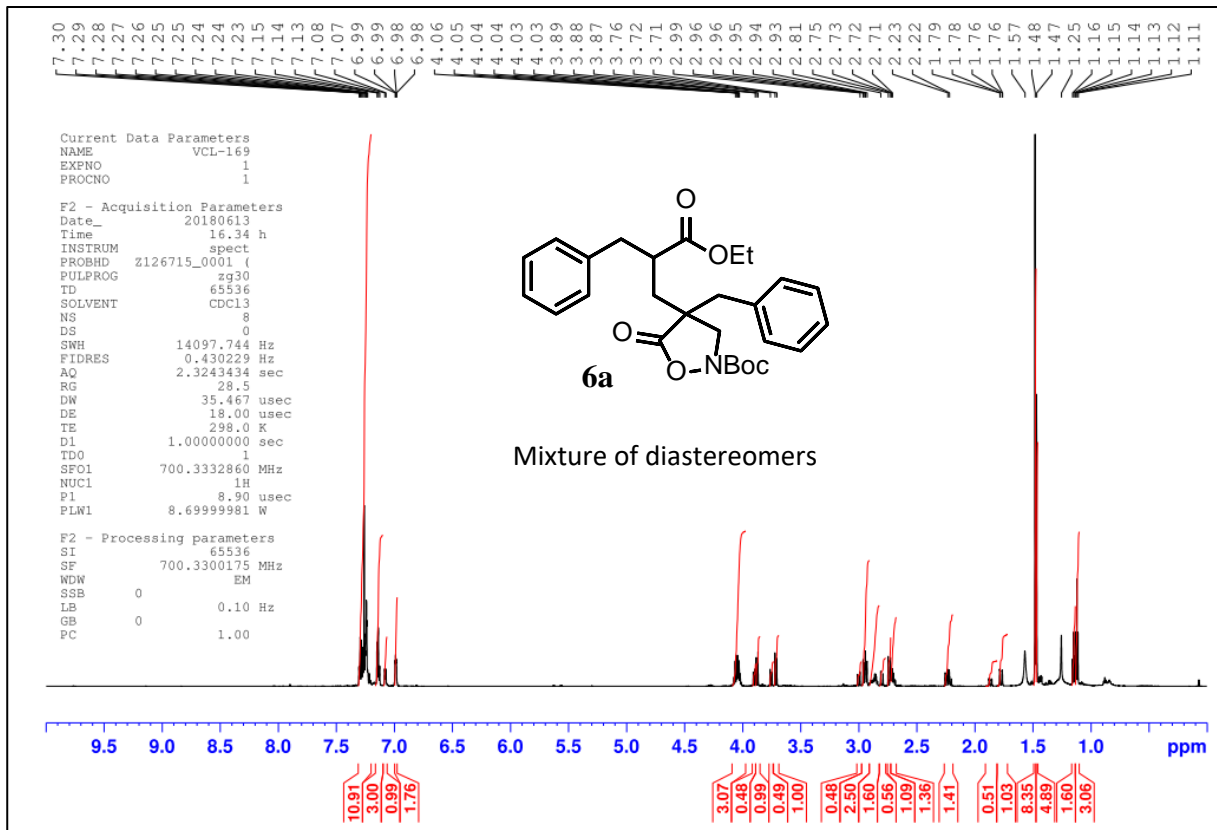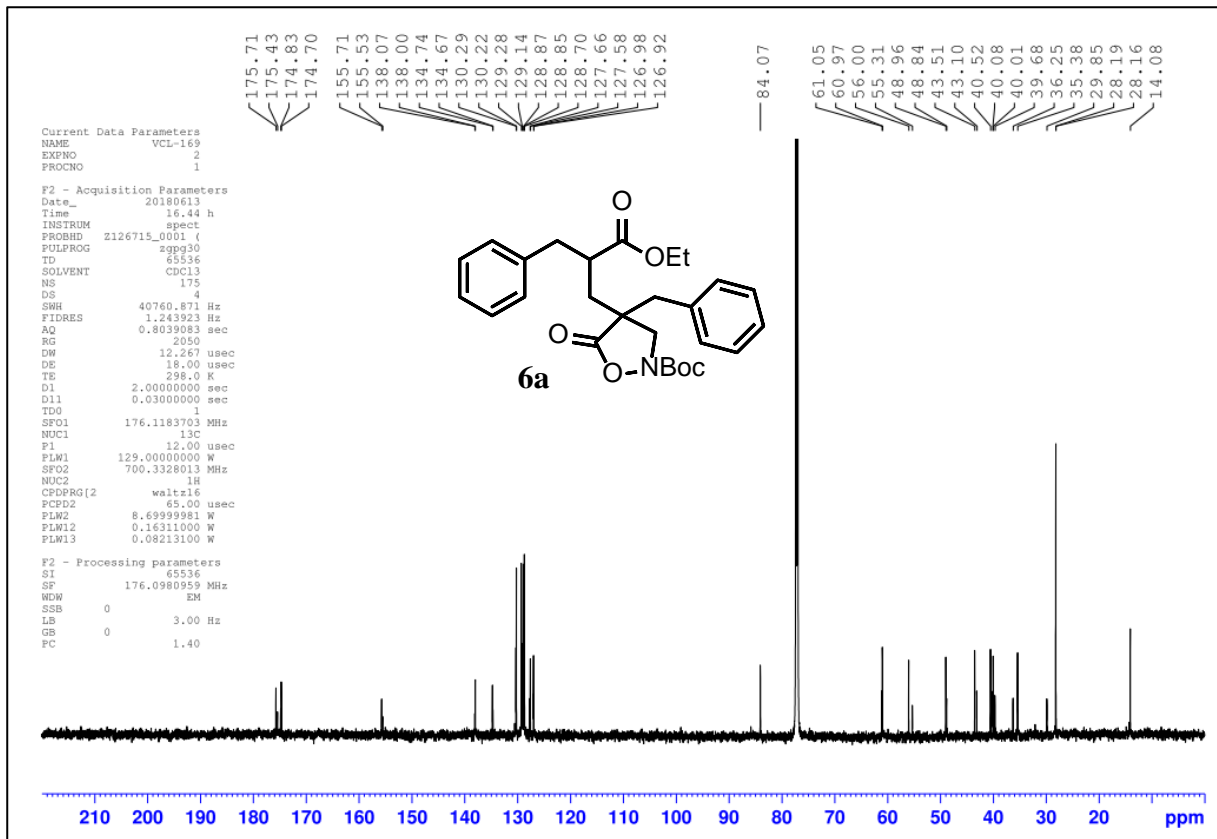

### 3. Copies of HPLC Chromatograms

Operator:Admin Timebase:U-3000\_DAD Sequence:WAS\_20180310\_VCL-AD-H

Page 1-2  
28.6.2018 7:21 PM

| 2 VCL-66-01-01 95/5 0,5 ml/min |                              |                     |          |
|--------------------------------|------------------------------|---------------------|----------|
| Sample Name:                   | VCL-66-01-01 95/5 0,5 ml/min | Injection Volume:   | 20,0     |
| Vial Number:                   | RA1                          | Channel:            | UV_VIS_1 |
| Sample Type:                   | unknown                      | Wavelength:         | 220      |
| Control Program:               | YMC90min_95-5_flow0,5        | Bandwidth:          | 4        |
| Quantif. Method:               | default                      | Temperature/Column: | 10       |
| Recording Time:                | 10.3.2018 13:38              | Flow ml/min:        | 0,500    |
| Run Time (min):                | 90,00                        | Sample Amount:      | 1,0000   |

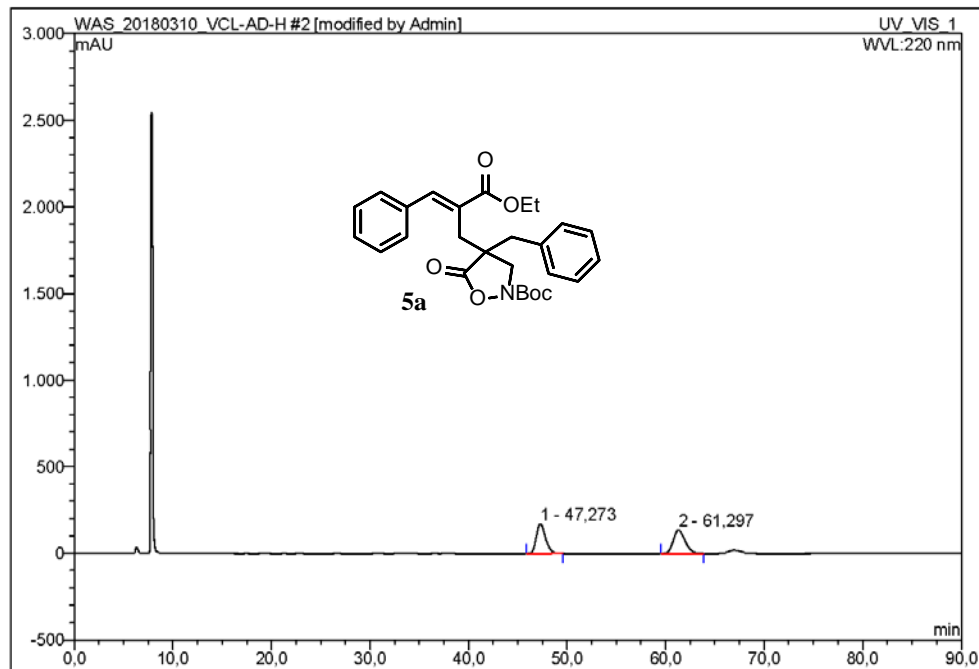

| No.           | Ret.Time<br>min | Peak Name | Height<br>mAU | Area<br>mAU*min | Rel.Area<br>% | Amount | Type |
|---------------|-----------------|-----------|---------------|-----------------|---------------|--------|------|
| 1             | 47,27           | n.a.      | 170,848       | 185,289         | 49,86         | n.a.   | BMB  |
| 2             | 61,30           | n.a.      | 134,840       | 186,360         | 50,14         | n.a.   | BMB  |
| <b>Total:</b> |                 |           | 305,688       | 371,648         | 100,00        | 0,000  |      |

**4 VCL-189-01-01 95/5 0,5 ml/min**

|                  |                               |                     |          |
|------------------|-------------------------------|---------------------|----------|
| Sample Name:     | VCL-189-01-01 95/5 0,5 ml/min | Injection Volume:   | 20,0     |
| Vial Number:     | RA1                           | Channel:            | UV_VIS_1 |
| Sample Type:     | unknown                       | Wavelength:         | 220      |
| Control Program: | YMC75min_95-5_flow0,5         | Bandwidth:          | 4        |
| Quantif. Method: | default                       | Temperature/Column: | 10       |
| Recording Time:  | 16.5.2018 14:44               | Flow ml/min:        | 0,500    |
| Run Time (min):  | 75,00                         | Sample Amount:      | 1,0000   |

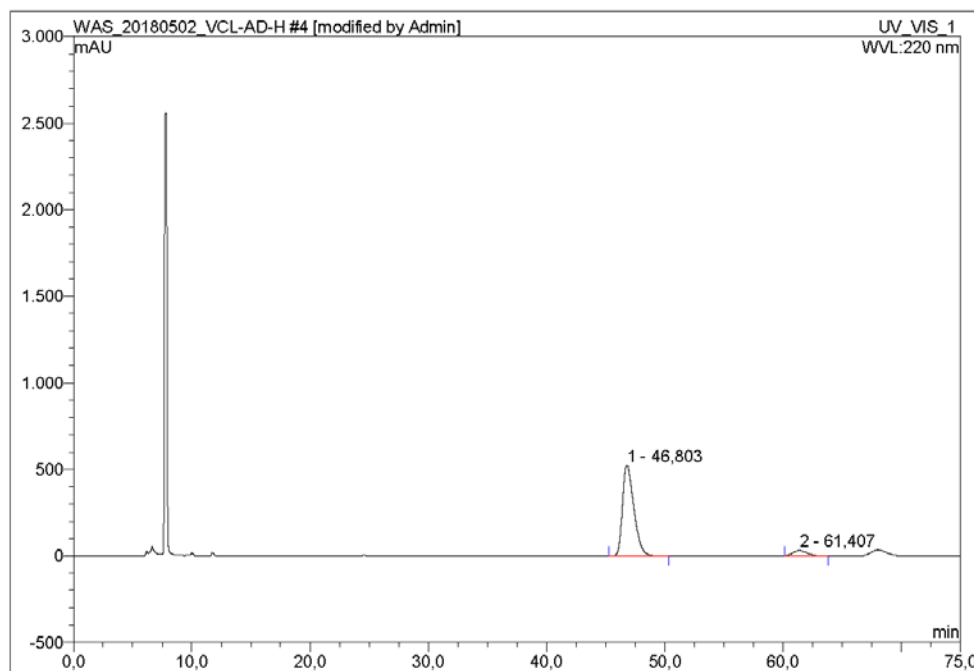

| No.           | Ret.Time<br>min | Peak Name | Height<br>mAU | Area<br>mAU*min | Rel.Area<br>% | Amount | Type |
|---------------|-----------------|-----------|---------------|-----------------|---------------|--------|------|
| 1             | 46,80           | n.a.      | 524,094       | 582,612         | 93,69         | n.a.   | BMB* |
| 2             | 61,41           | n.a.      | 29,717        | 39,236          | 6,31          | n.a.   | BMB* |
| <b>Total:</b> |                 |           | 553,811       | 621,848         | 100,00        | 0,000  |      |

**7 VCL-115-01-01 80/20 0,5 ml/min**

|                  |                                |                     |          |
|------------------|--------------------------------|---------------------|----------|
| Sample Name:     | VCL-115-01-01 80/20 0,5 ml/min | Injection Volume:   | 20,0     |
| Vial Number:     | RB1                            | Channel:            | UV_VIS_1 |
| Sample Type:     | unknown                        | Wavelength:         | 220      |
| Control Program: | YMC60min_80-20_flow0,5         | Bandwidth:          | 4        |
| Quantif. Method: | default                        | Temperature/Column: | 10       |
| Recording Time:  | 11.6.2018 17:47                | Flow ml/min:        | 0,500    |
| Run Time (min):  | 41,50                          | Sample Amount:      | 1,0000   |

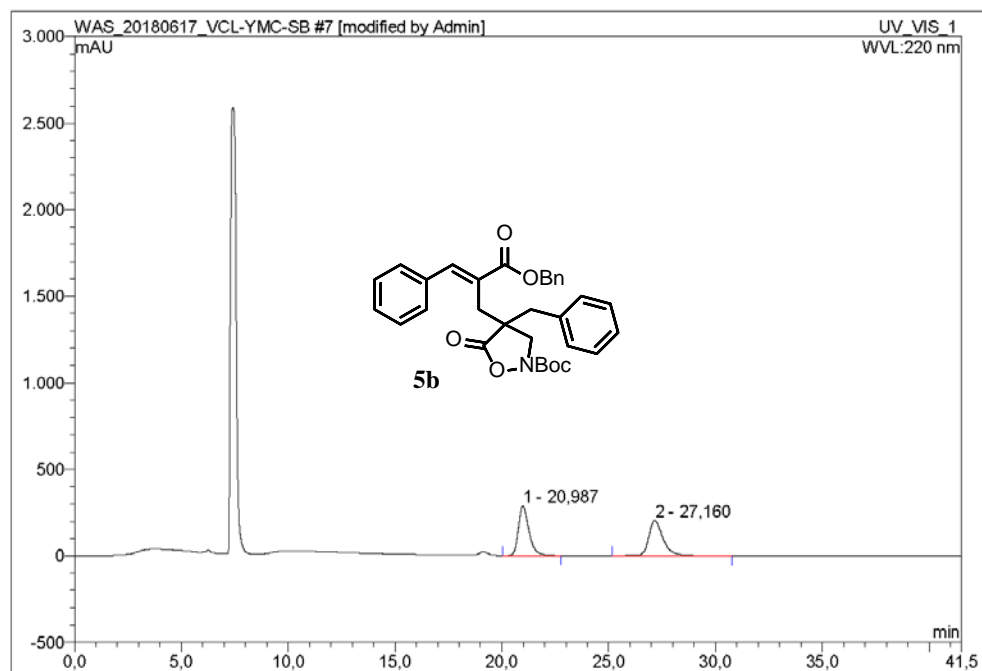

| No.           | Ret.Time<br>min | Peak Name | Height<br>mAU | Area<br>mAU*min | Rel.Area<br>% | Amount | Type |
|---------------|-----------------|-----------|---------------|-----------------|---------------|--------|------|
| 1             | 20,99           | n.a.      | 286,327       | 163,234         | 50,74         | n.a.   | BMB* |
| 2             | 27,16           | n.a.      | 204,069       | 158,475         | 49,26         | n.a.   | BMB* |
| <b>Total:</b> |                 |           | 490,396       | 321,709         | 100,00        | 0,000  |      |

**2 VCL-242-01-01 80/20 0,5 ml/min**

|                  |                                |                     |          |
|------------------|--------------------------------|---------------------|----------|
| Sample Name:     | VCL-242-01-01 80/20 0,5 ml/min | Injection Volume:   | 20,0     |
| Vial Number:     | RA1                            | Channel:            | UV_VIS_1 |
| Sample Type:     | unknown                        | Wavelength:         | 220      |
| Control Program: | YMC35min_80-20_flow0,5         | Bandwidth:          | 4        |
| Quantif. Method: | default                        | Temperature/Column: | 10       |
| Recording Time:  | 18.6.2018 13:46                | Flow ml/min:        | 0,500    |
| Run Time (min):  | 35,00                          | Sample Amount:      | 1,0000   |

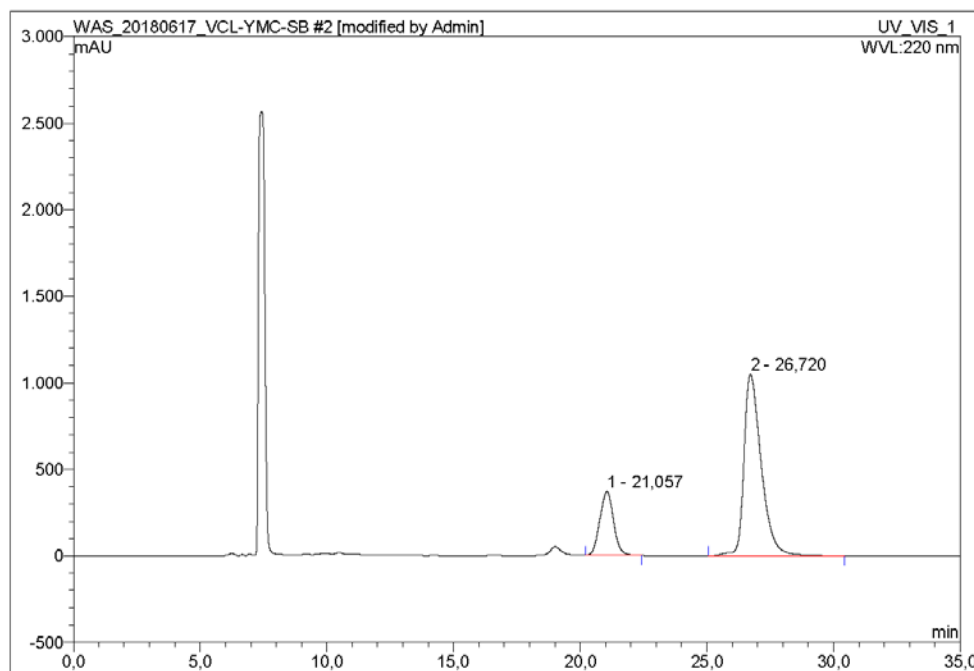

| No.           | Ret.Time<br>min | Peak Name | Height<br>mAU | Area<br>mAU*min | Rel.Area<br>% | Amount | Type |
|---------------|-----------------|-----------|---------------|-----------------|---------------|--------|------|
| 1             | 21,06           | n.a.      | 370,156       | 232,453         | 21,96         | n.a.   | BMB* |
| 2             | 26,72           | n.a.      | 1050,232      | 826,094         | 78,04         | n.a.   | BMB  |
| <b>Total:</b> |                 |           | 1420,388      | 1058,546        | 100,00        | 0,000  |      |

SAMPLE INFORMATION

|                   |                  |                  |                      |
|-------------------|------------------|------------------|----------------------|
| Sample Name:      | VCL-114 rac IA-3 | Acquired By:     | System               |
| Sample Type:      | Unknown          | Date Acquired:   | 9/4/2018 10:55:34 AM |
| Vial:             | 1                | Acq. Method:     | 80 20 a 08 ml        |
| Injection #:      | 1                | Date Processed:  | 9/4/2018 11:25:33 AM |
| Injection Volume: | 20.00 ul         | Channel Name:    | 2487Channel 1        |
| Run Time:         | 120.00 Minutes   | Channel Desc.:   |                      |
| Column Type:      |                  | Sample Set Name: |                      |

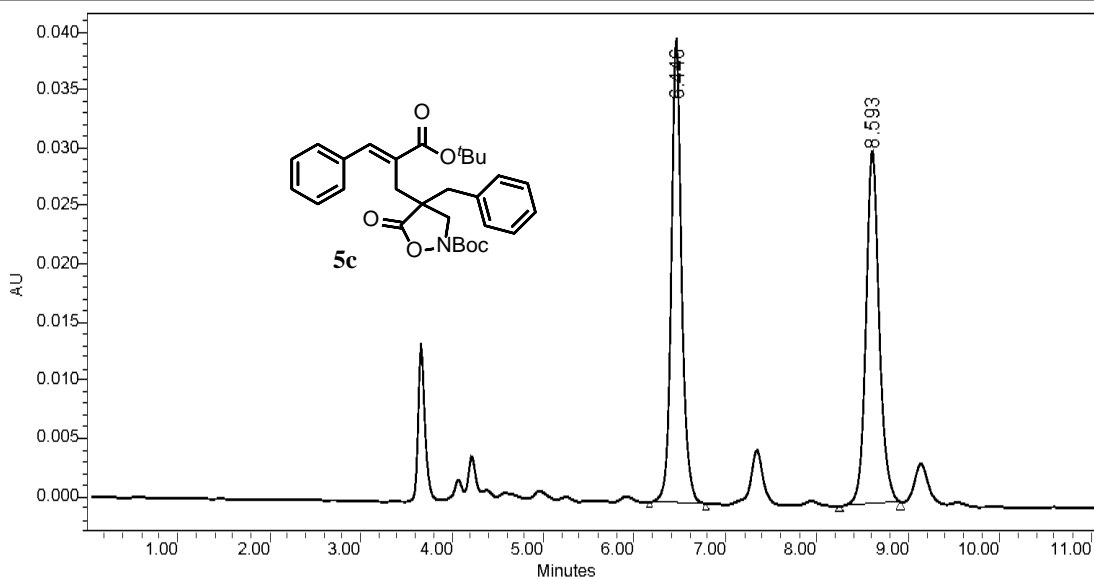

|   | RT (min) | Area (AU*sec) | % Area | Height (AU) | % Height |
|---|----------|---------------|--------|-------------|----------|
| 1 | 6.446    | 312847        | 50.36  | 39925       | 56.70    |
| 2 | 8.593    | 308353        | 49.64  | 30486       | 43.30    |



SAMPLE INFORMATION

|                   |                |                  |                      |
|-------------------|----------------|------------------|----------------------|
| Sample Name:      | VCL-304 IA-3   | Acquired By:     | System               |
| Sample Type:      | Unknown        | Date Acquired:   | 9/4/2018 11:11:00 AM |
| Vial:             | 1              | Acq. Method:     | 80 20 a 08 ml        |
| Injection #:      | 2              | Date Processed:  | 9/4/2018 11:25:51 AM |
| Injection Volume: | 20.00 ul       | Channel Name:    | 2487Channel 1        |
| Run Time:         | 120.00 Minutes | Channel Desc.:   |                      |
| Column Type:      |                | Sample Set Name: |                      |

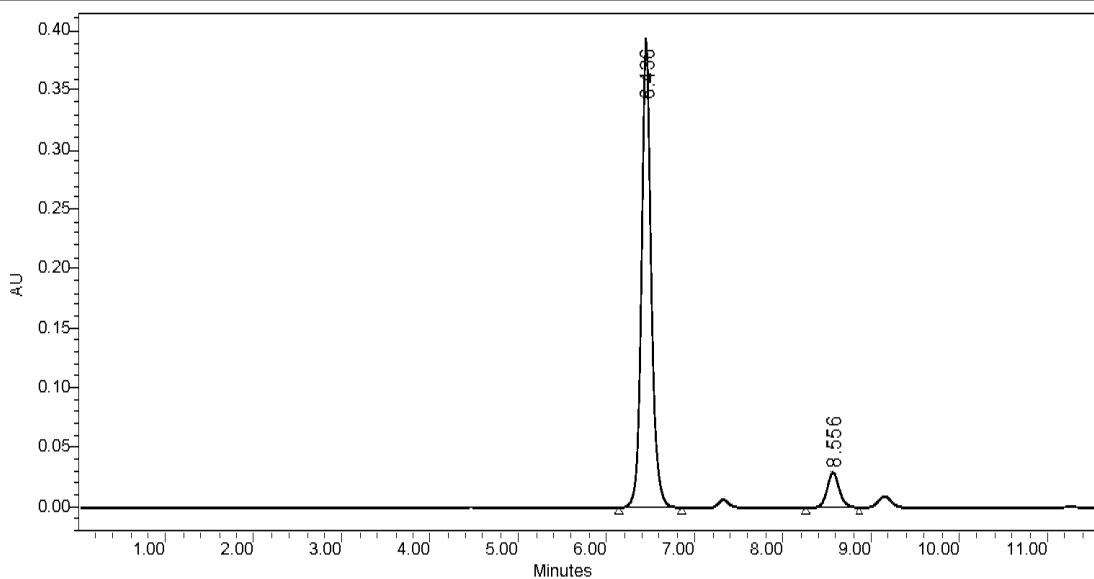

|   | RT (min) | Area (AU*sec) | % Area | Height (AU) | % Height |
|---|----------|---------------|--------|-------------|----------|
| 1 | 6.436    | 3007416       | 91.14  | 392781      | 92.96    |
| 2 | 8.556    | 292491        | 8.86   | 29738       | 7.04     |

SAMPLE INFORMATION

|                   |                   |                  |                      |
|-------------------|-------------------|------------------|----------------------|
| Sample Name:      | VCL-252 RAC2 AD-H | Acquired By:     | System               |
| Sample Type:      | Unknown           | Date Acquired:   | 7/7/2018 12:16:07 PM |
| Vial:             | 1                 | Acq. Method:     | 80 a 20 05           |
| Injection #:      | 3                 | Date Processed:  | 8/3/2018 6:29:55 PM  |
| Injection Volume: | 20.00 ul          | Channel Name:    | 2487Channel 1        |
| Run Time:         | 120.00 Minutes    | Channel Desc.:   |                      |
| Column Type:      |                   | Sample Set Name: |                      |

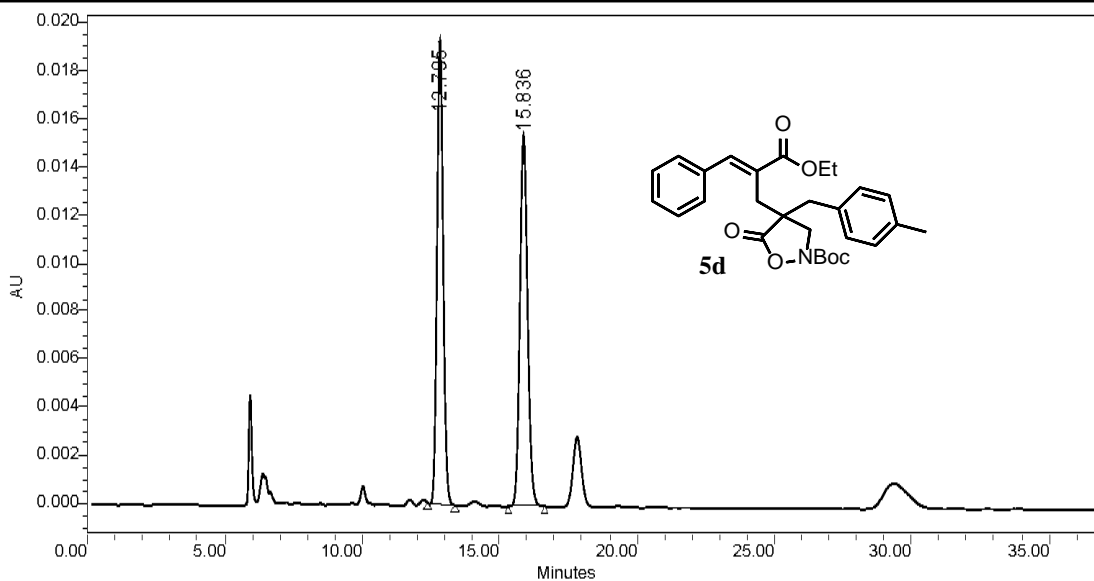

|   | RT (min) | Area (V*sec) | % Area | Height (V) | % Height |
|---|----------|--------------|--------|------------|----------|
| 1 | 12.795   | 301488       | 49.98  | 19273      | 55.59    |
| 2 | 15.836   | 301694       | 50.02  | 15396      | 44.41    |

SAMPLE INFORMATION

|                   |                |                  |                       |
|-------------------|----------------|------------------|-----------------------|
| Sample Name:      | VCL-281-5d     | Acquired By:     | System                |
| Sample Type:      | Unknown        | Date Acquired:   | 10/9/2018 3:58:30 PM  |
| Vial:             | 1              | Acq. Method:     | 80 20 05ml 254e270 nm |
| Injection #:      | 2              | Date Processed:  | 10/9/2018 6:55:28 PM  |
| Injection Volume: | 20.00 ul       | Channel Name:    | 2487Channel 1         |
| Run Time:         | 120.00 Minutes | Channel Desc.:   |                       |
| Column Type:      |                | Sample Set Name: |                       |

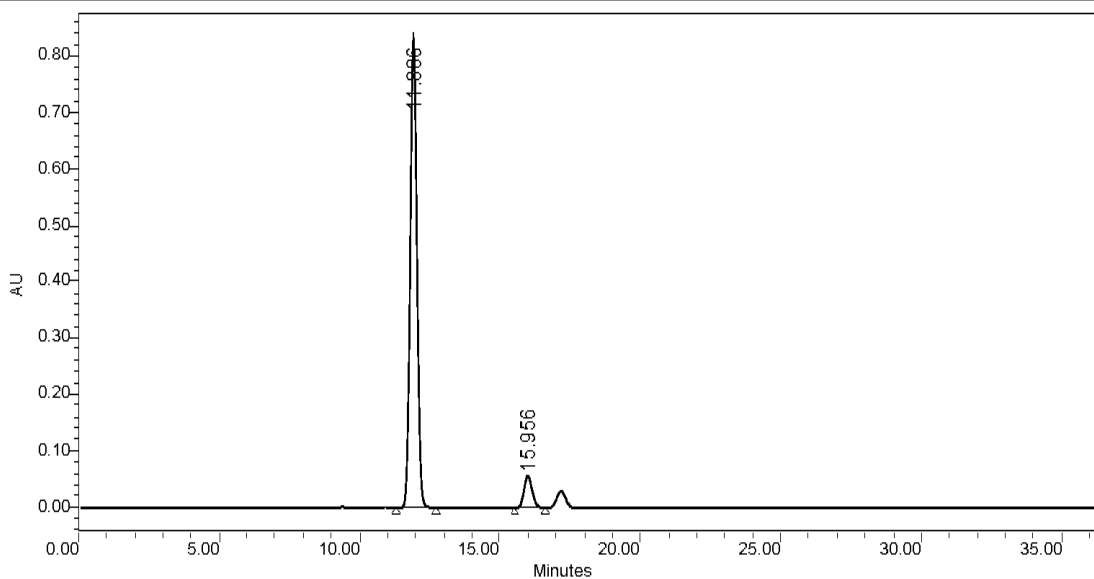

|   | RT (min) | Area (Δ*sec) | % Area | Height (Δ) | % Height |
|---|----------|--------------|--------|------------|----------|
| 1 | 11.886   | 13940446     | 92.25  | 833274     | 93.70    |
| 2 | 15.956   | 1171345      | 7.75   | 56009      | 6.30     |

SAMPLE INFORMATION

|                   |                  |                  |                     |
|-------------------|------------------|------------------|---------------------|
| Sample Name:      | VCL-275 RAC 4 IC | Acquired By:     | System              |
| Sample Type:      | Unknown          | Date Acquired:   | 8/2/2018 9:50:48 AM |
| Vial:             | 1                | Acq. Method:     | 80 20 1 ml 254 nm   |
| Injection #:      | 1                | Date Processed:  | 8/3/2018 6:37:08 PM |
| Injection Volume: | 20.00 ul         | Channel Name:    | 2487Channel 1       |
| Run Time:         | 120.00 Minutes   | Channel Desc.:   |                     |
| Column Type:      |                  | Sample Set Name: |                     |

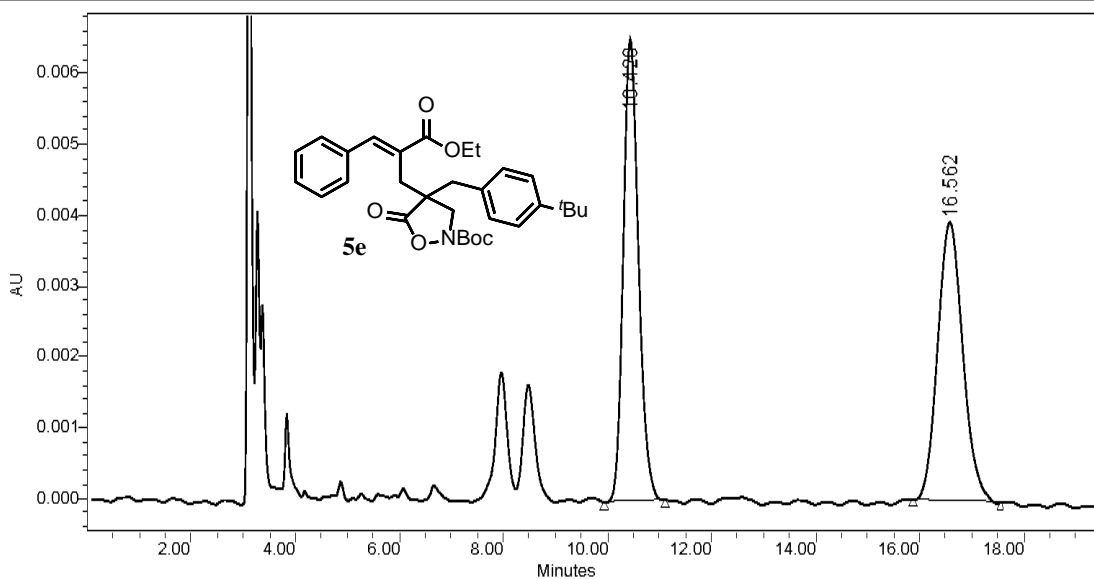

|   | RT (min) | Area (AU*sec) | % Area | Height (AU) | % Height |
|---|----------|---------------|--------|-------------|----------|
| 1 | 10.420   | 132581        | 50.04  | 6533        | 62.44    |
| 2 | 16.562   | 132343        | 49.96  | 3930        | 37.56    |

SAMPLE INFORMATION

|                   |                |                  |                      |
|-------------------|----------------|------------------|----------------------|
| Sample Name:      | VCL-302 IC     | Acquired By:     | System               |
| Sample Type:      | Unknown        | Date Acquired:   | 8/28/2018 1:02:00 PM |
| Vial:             | 1              | Acq. Method:     | 80 20 1 ml 254 nm    |
| Injection #:      | 4              | Date Processed:  | 8/30/2018 1:22:45 PM |
| Injection Volume: | 20.00 ul       | Channel Name:    | 2487Channel 1        |
| Run Time:         | 120.00 Minutes | Channel Desc.:   |                      |
| Column Type:      |                | Sample Set Name: |                      |

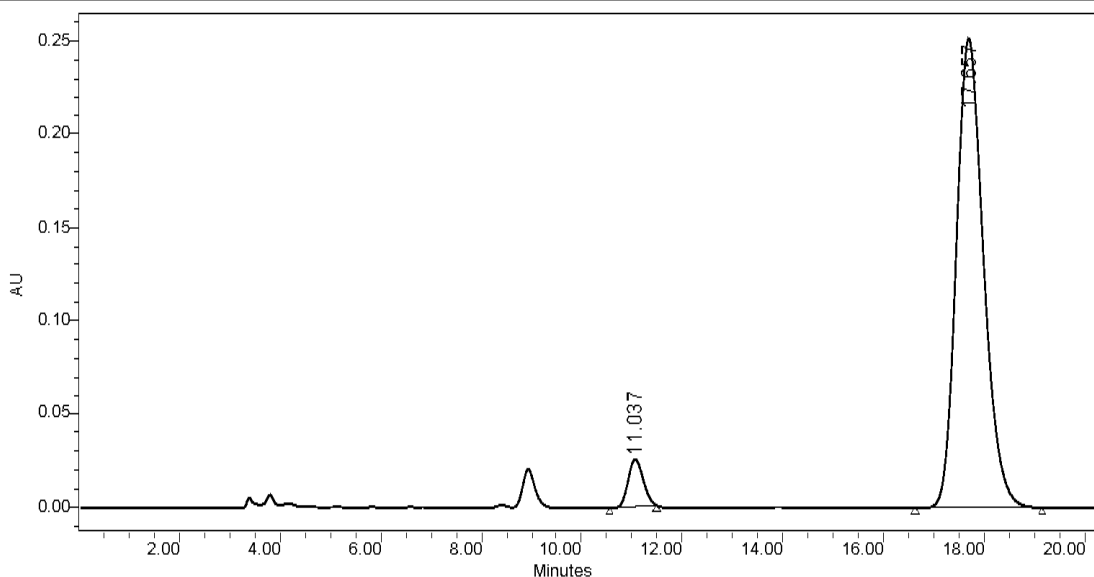

|   | RT (min) | Area (∇*sec) | % Area | Height (∇) | % Height |
|---|----------|--------------|--------|------------|----------|
| 1 | 11.037   | 539117       | 5.41   | 25625      | 9.24     |
| 2 | 17.657   | 9430589      | 94.59  | 251845     | 90.76    |

**7 VCL-244-01-01 80/20 0,5 ml/min**

|                  |                                |                     |          |
|------------------|--------------------------------|---------------------|----------|
| Sample Name:     | VCL-244-01-01 80/20 0,5 ml/min | Injection Volume:   | 20,0     |
| Vial Number:     | RA2                            | Channel:            | UV_VIS_1 |
| Sample Type:     | unknown                        | Wavelength:         | 220      |
| Control Program: | YMC60min_80-20_flow0,5         | Bandwidth:          | 4        |
| Quantif. Method: | default                        | Temperature/Column: | 10       |
| Recording Time:  | 11.6.2018 16:31                | Flow ml/min:        | 0,500    |
| Run Time (min):  | 39,80                          | Sample Amount:      | 1,0000   |

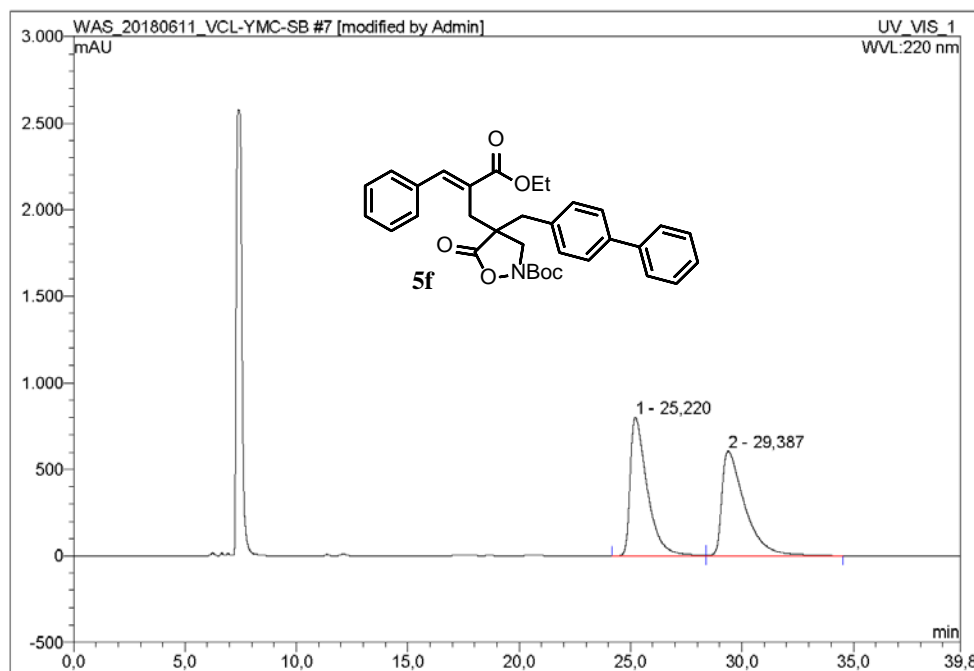

| No.           | Ret.Time<br>min | Peak Name | Height<br>mAU | Area<br>mAU*min | Rel.Area<br>% | Amount | Type |
|---------------|-----------------|-----------|---------------|-----------------|---------------|--------|------|
| 1             | 25,22           | n.a.      | 802,474       | 709,989         | 49,75         | n.a.   | BM   |
| 2             | 29,39           | n.a.      | 604,830       | 717,046         | 50,25         | n.a.   | MB   |
| <b>Total:</b> |                 |           | 1407,304      | 1427,035        | 100,00        | 0,000  |      |

|                                         |                                |                        |
|-----------------------------------------|--------------------------------|------------------------|
| <b>2 VCL-263-01-01 90/10 0,5 ml/min</b> |                                |                        |
| Sample Name:                            | VCL-263-01-01 90/10 0,5 ml/min | Injection Volume: 20,0 |
| Vial Number:                            | RA1                            | Channel: UV_VIS_1      |
| Sample Type:                            | unknown                        | Wavelength: 220        |
| Control Program:                        | YMC40min_80-20_flow0,5         | Bandwidth: 4           |
| Quantif. Method:                        | default                        | Temperature/Column: 10 |
| Recording Time:                         | 27.6.2018 14:41                | Flow ml/min: 0,500     |
| Run Time (min):                         | 40,00                          | Sample Amount: 1,0000  |

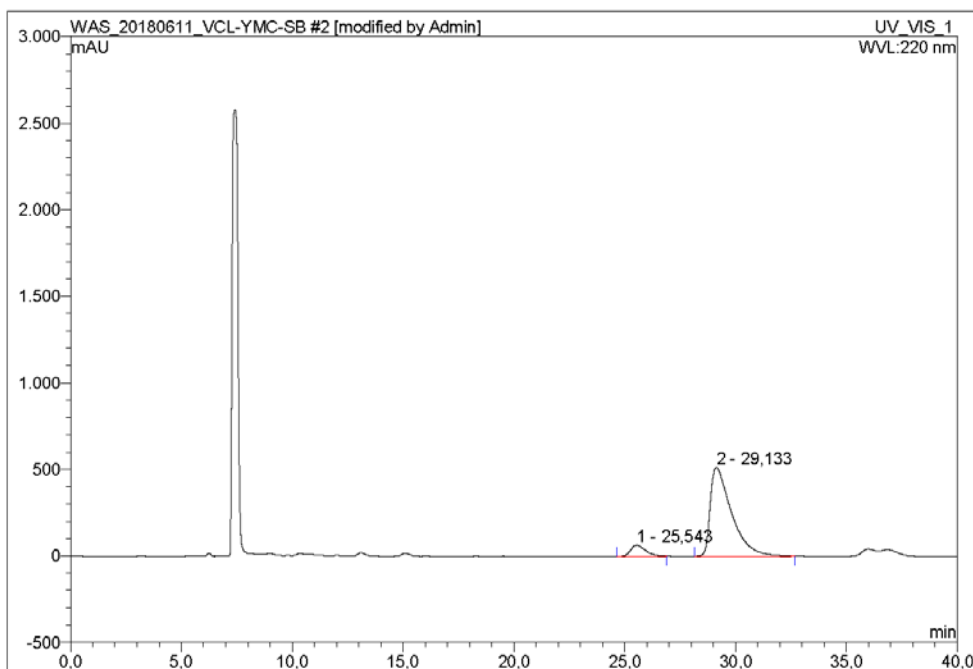

| No.           | Ret.Time min | Peak Name | Height mAU | Area mAU*min | Rel.Area % | Amount | Type |
|---------------|--------------|-----------|------------|--------------|------------|--------|------|
| 1             | 25,54        | n.a.      | 64,315     | 49,968       | 8,06       | n.a.   | BMB* |
| 2             | 29,13        | n.a.      | 513,895    | 570,107      | 91,94      | n.a.   | BMB* |
| <b>Total:</b> |              |           | 578,210    | 620,075      | 100,00     | 0,000  |      |

**9 VCL-246-01-01 80/20 0,5 ml/min**

|                  |                                |                     |          |
|------------------|--------------------------------|---------------------|----------|
| Sample Name:     | VCL-246-01-01 80/20 0,5 ml/min | Injection Volume:   | 20,0     |
| Vial Number:     | RA4                            | Channel:            | UV_VIS_1 |
| Sample Type:     | unknown                        | Wavelength:         | 220      |
| Control Program: | YMC60min_80-20_flow0,5         | Bandwidth:          | 4        |
| Quantif. Method: | default                        | Temperature/Column: | 10       |
| Recording Time:  | 11.6.2018 13:33                | Flow ml/min:        | 0,500    |
| Run Time (min):  | 60,00                          | Sample Amount:      | 1,0000   |

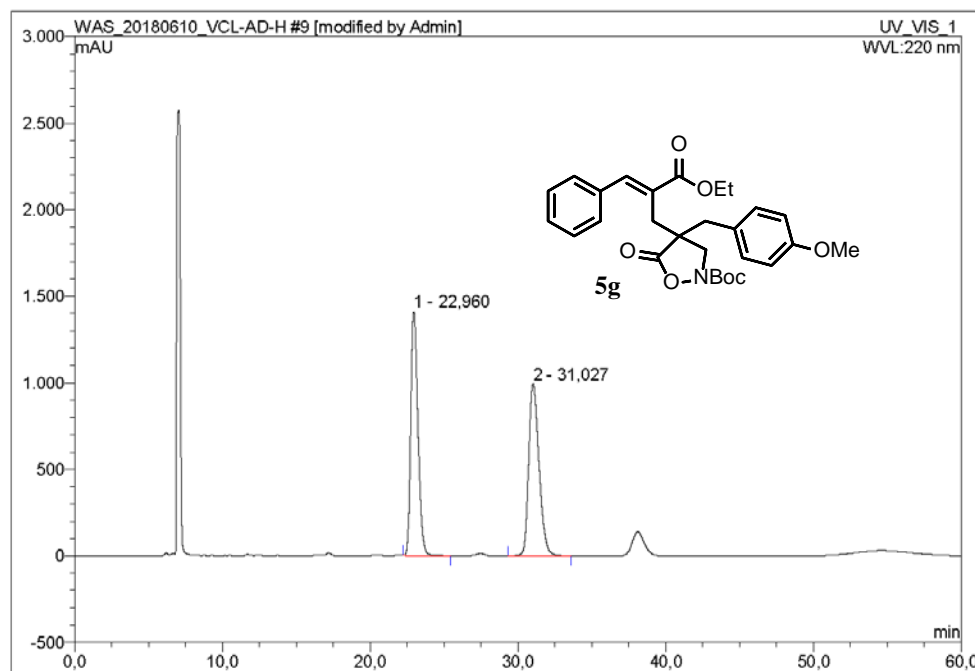

| No.           | Ret.Time<br>min | Peak Name | Height<br>mAU | Area<br>mAU*min | Rel.Area<br>% | Amount | Type |
|---------------|-----------------|-----------|---------------|-----------------|---------------|--------|------|
| 1             | 22,96           | n.a.      | 1410,541      | 793,666         | 49,69         | n.a.   | BMB  |
| 2             | 31,03           | n.a.      | 994,045       | 803,564         | 50,31         | n.a.   | BMB  |
| <b>Total:</b> |                 |           | 2404,586      | 1597,230        | 100,00        | 0,000  |      |



**5 VCL-258-01-01 80/20 0,5 ml/min**

|                  |                                |                     |          |
|------------------|--------------------------------|---------------------|----------|
| Sample Name:     | VCL-258-01-01 80/20 0,5 ml/min | Injection Volume:   | 20,0     |
| Vial Number:     | RA1                            | Channel:            | UV_VIS_1 |
| Sample Type:     | unknown                        | Wavelength:         | 220      |
| Control Program: | YMC60min_80-20_flow0,5         | Bandwidth:          | 4        |
| Quantif. Method: | default                        | Temperature/Column: | 10       |
| Recording Time:  | 18.6.2018 17:28                | Flow ml/min:        | 0,500    |
| Run Time (min):  | 34,34                          | Sample Amount:      | 1,0000   |

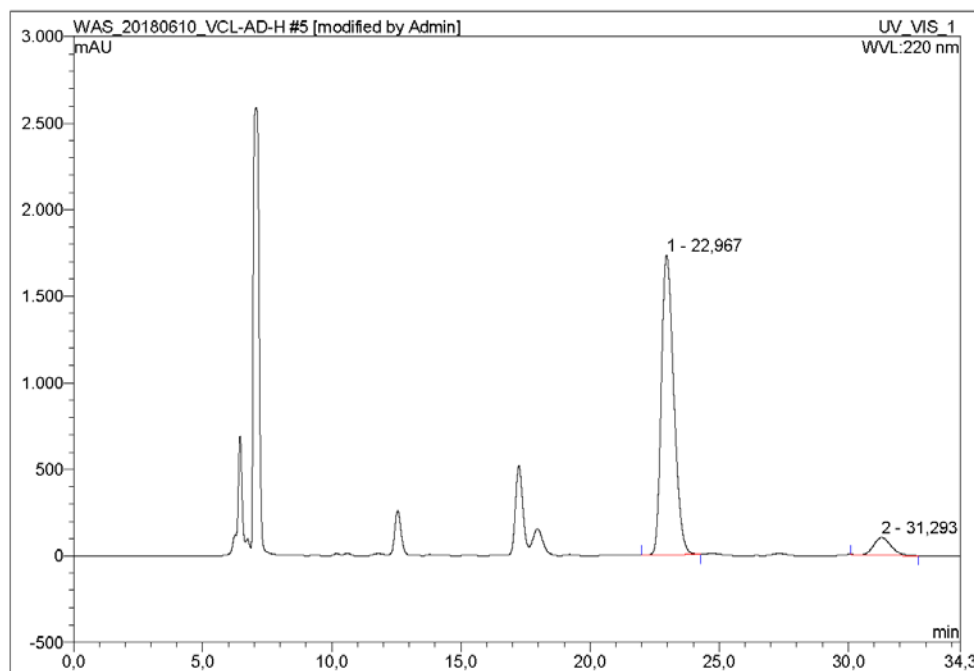

| No.           | Ret.Time<br>min | Peak Name | Height<br>mAU | Area<br>mAU*min | Rel.Area<br>% | Amount | Type |
|---------------|-----------------|-----------|---------------|-----------------|---------------|--------|------|
| 1             | 22,97           | n.a.      | 1732,781      | 968,815         | 92,58         | n.a.   | BMB* |
| 2             | 31,29           | n.a.      | 103,647       | 77,620          | 7,42          | n.a.   | BMB* |
| <b>Total:</b> |                 |           | 1836,428      | 1046,435        | 100,00        | 0,000  |      |

**4 VCL-245-01-01 90/10 0,5 ml/min**

|                  |                                |                     |          |
|------------------|--------------------------------|---------------------|----------|
| Sample Name:     | VCL-245-01-01 90/10 0,5 ml/min | Injection Volume:   | 20,0     |
| Vial Number:     | RA2                            | Channel:            | UV_VIS_1 |
| Sample Type:     | unknown                        | Wavelength:         | 220      |
| Control Program: | YMC75min_90-10_flow0,5         | Bandwidth:          | 4        |
| Quantif. Method: | default                        | Temperature/Column: | 10       |
| Recording Time:  | 18.6.2018 14:50                | Flow ml/min:        | 0,500    |
| Run Time (min):  | 44,77                          | Sample Amount:      | 1,0000   |

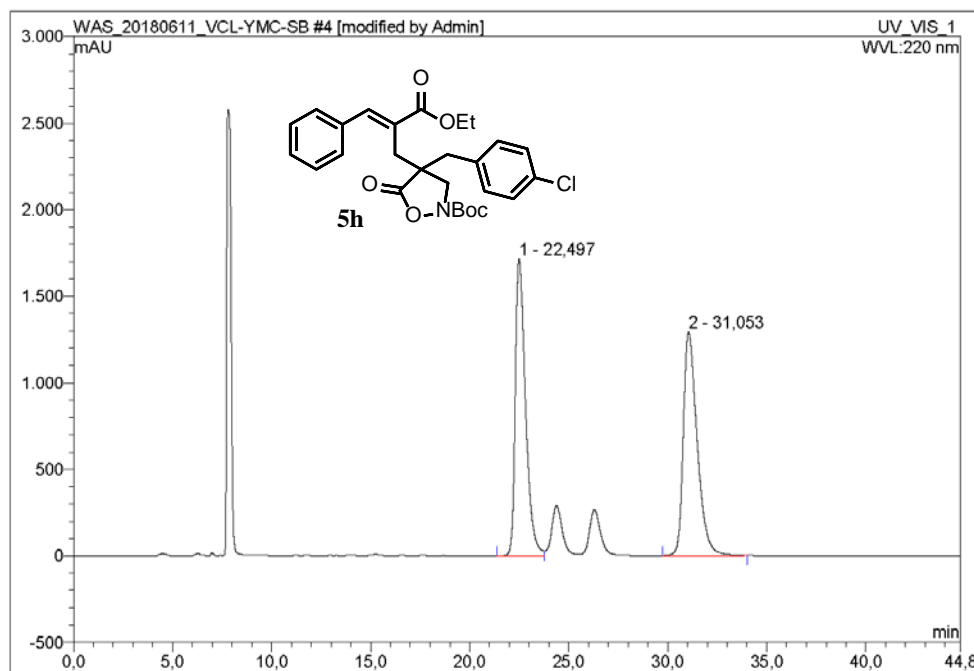

| No.           | Ret.Time<br>min | Peak Name | Height<br>mAU | Area<br>mAU*min | Rel.Area<br>% | Amount | Type |
|---------------|-----------------|-----------|---------------|-----------------|---------------|--------|------|
| 1             | 22,50           | n.a.      | 1717,597      | 1026,634        | 49,60         | n.a.   | BM * |
| 2             | 31,05           | n.a.      | 1291,391      | 1043,342        | 50,40         | n.a.   | BMB* |
| <b>Total:</b> |                 |           | 3008,988      | 2069,976        | 100,00        | 0,000  |      |

**3 VCL-257-01-01 90/10 0,5 ml/min**

|                  |                                |                     |          |
|------------------|--------------------------------|---------------------|----------|
| Sample Name:     | VCL-257-01-01 90/10 0,5 ml/min | Injection Volume:   | 20,0     |
| Vial Number:     | RA3                            | Channel:            | UV_VIS_1 |
| Sample Type:     | unknown                        | Wavelength:         | 220      |
| Control Program: | YMC75min_90-10_flow0,5         | Bandwidth:          | 4        |
| Quantif. Method: | default                        | Temperature/Column: | 10       |
| Recording Time:  | 18.6.2018 15:41                | Flow ml/min:        | 0,500    |
| Run Time (min):  | 35,60                          | Sample Amount:      | 1,0000   |

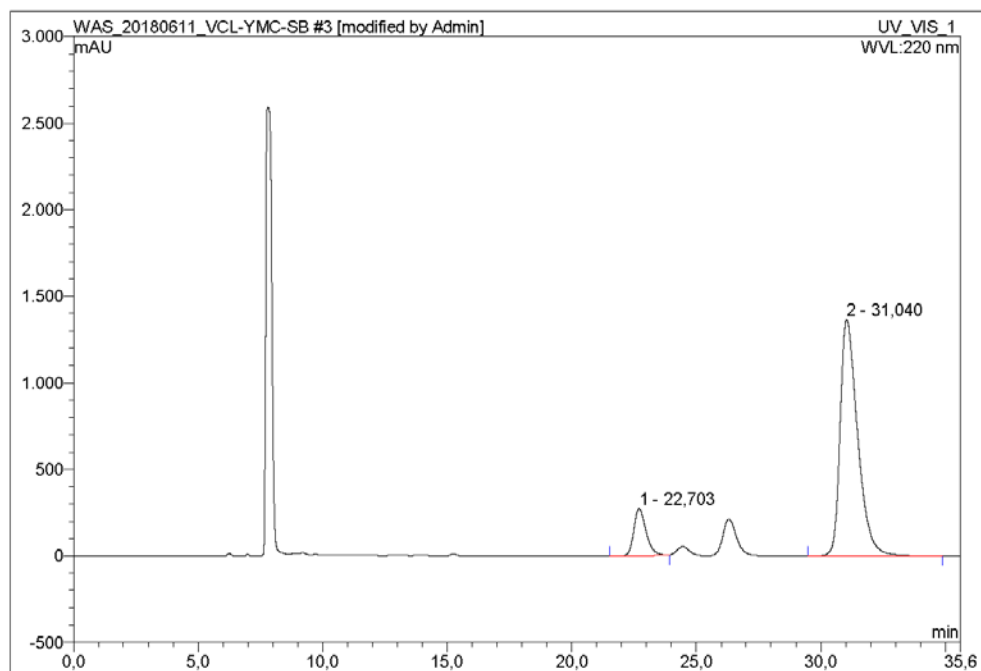

| No.           | Ret.Time<br>min | Peak Name | Height<br>mAU | Area<br>mAU*min | Rel.Area<br>% | Amount | Type |
|---------------|-----------------|-----------|---------------|-----------------|---------------|--------|------|
| 1             | 22,70           | n.a.      | 272,411       | 152,708         | 12,05         | n.a.   | BMB* |
| 2             | 31,04           | n.a.      | 1367,472      | 1114,483        | 87,95         | n.a.   | BMB  |
| <b>Total:</b> |                 |           | 1639,882      | 1267,190        | 100,00        | 0,000  |      |

SAMPLE INFORMATION

|                   |                |                  |                      |
|-------------------|----------------|------------------|----------------------|
| Sample Name:      | VCL-250 RAC IC | Acquired By:     | System               |
| Sample Type:      | Unknown        | Date Acquired:   | 8/2/2018 10:13:34 AM |
| Vial:             | 1              | Acq. Method:     | 80 20 1 ml 254 nm    |
| Injection #:      | 2              | Date Processed:  | 8/3/2018 6:39:12 PM  |
| Injection Volume: | 20.00 ul       | Channel Name:    | 2487Channel 1        |
| Run Time:         | 120.00 Minutes | Channel Desc.:   |                      |
| Column Type:      |                | Sample Set Name: |                      |

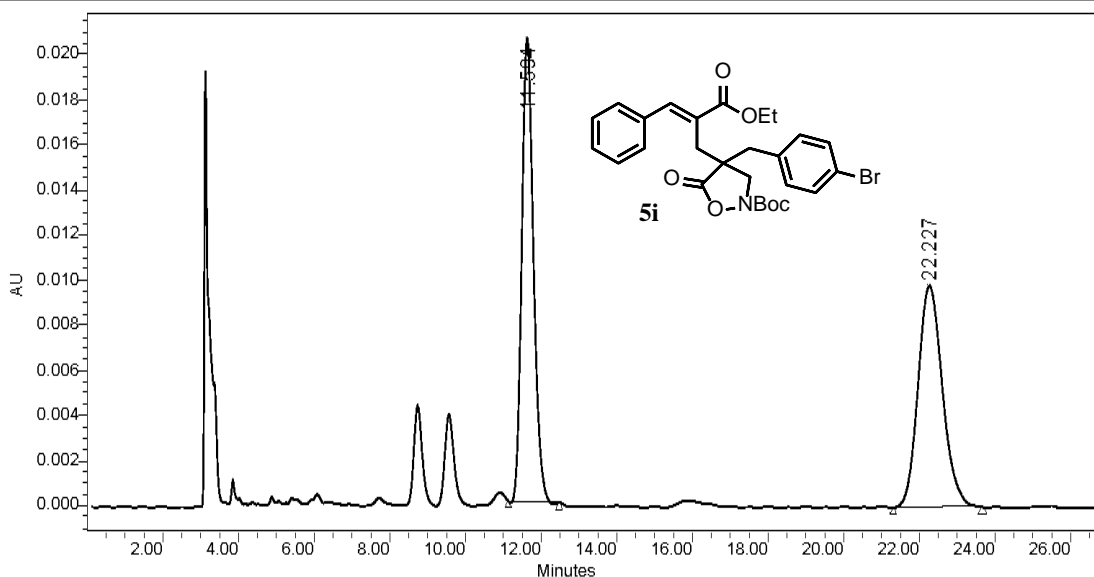

|   | RT (min) | Area (V*sec) | % Area | Height (V) | % Height |
|---|----------|--------------|--------|------------|----------|
| 1 | 11.594   | 440524       | 49.95  | 20569      | 67.63    |
| 2 | 22.227   | 441343       | 50.05  | 9845       | 32.37    |

SAMPLE INFORMATION

|                   |                |                  |                      |
|-------------------|----------------|------------------|----------------------|
| Sample Name:      | VCL-301 IC     | Acquired By:     | System               |
| Sample Type:      | Unknown        | Date Acquired:   | 8/27/2018 5:15:30 PM |
| Vial:             | 1              | Acq. Method:     | 80 20 1 ml 254 nm    |
| Injection #:      | 1              | Date Processed:  | 8/30/2018 1:20:42 PM |
| Injection Volume: | 20.00 ul       | Channel Name:    | 2487Channel 1        |
| Run Time:         | 120.00 Minutes | Channel Desc.:   |                      |
| Column Type:      |                | Sample Set Name: |                      |

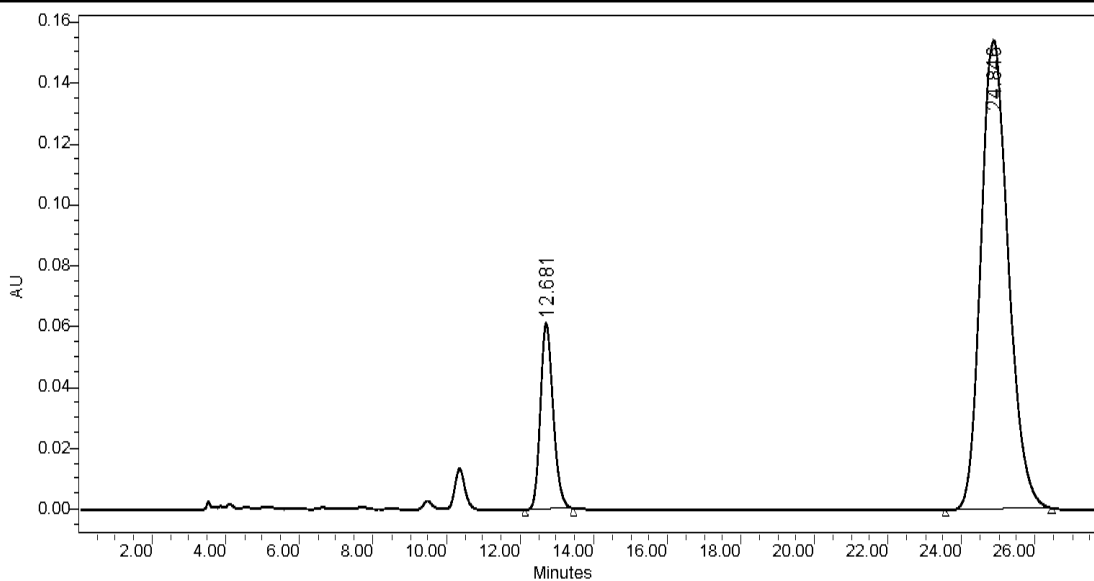

|   | RT (min) | Area (∇*sec) | % Area | Height (∇) | % Height |
|---|----------|--------------|--------|------------|----------|
| 1 | 12.681   | 1470326      | 15.54  | 60969      | 28.36    |
| 2 | 24.846   | 7992438      | 84.46  | 154043     | 71.64    |

SAMPLE INFORMATION

|                   |                   |                  |                      |
|-------------------|-------------------|------------------|----------------------|
| Sample Name:      | VCL-274 RAC2 AD-H | Acquired By:     | System               |
| Sample Type:      | Unknown           | Date Acquired:   | 7/7/2018 12:56:17 PM |
| Vial:             | 1                 | Acq. Method:     | 80 a 20 05           |
| Injection #:      | 4                 | Date Processed:  | 8/6/2018 5:20:10 PM  |
| Injection Volume: | 20.00 ul          | Channel Name:    | 2487Channel 1        |
| Run Time:         | 120.00 Minutes    | Channel Desc.:   |                      |
| Column Type:      |                   | Sample Set Name: |                      |

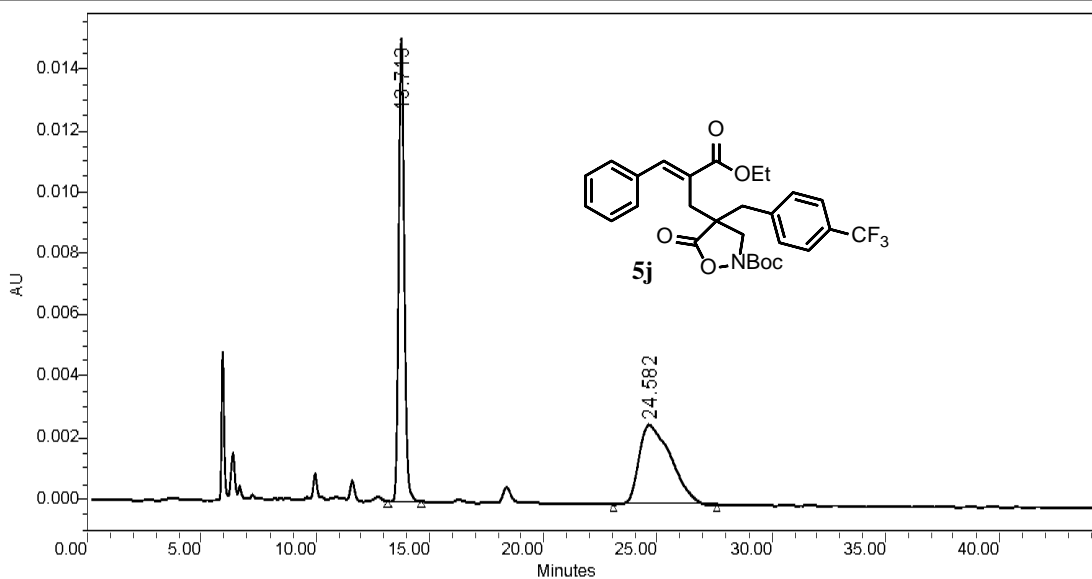

|   | RT (min) | Area (V*sec) | % Area | Height (V) | % Height |
|---|----------|--------------|--------|------------|----------|
| 1 | 13.713   | 255064       | 50.18  | 15078      | 85.36    |
| 2 | 24.582   | 253185       | 49.82  | 2585       | 14.64    |

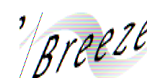

SAMPLE INFORMATION

|                   |                |                  |                      |
|-------------------|----------------|------------------|----------------------|
| Sample Name:      | VCL-280-2 AD-H | Acquired By:     | System               |
| Sample Type:      | Unknown        | Date Acquired:   | 10/9/2018 4:48:29 PM |
| Vial:             | 1              | Acq. Method:     | 80 a 20 05ml 254 220 |
| Injection #:      | 3              | Date Processed:  | 10/9/2018 6:54:42 PM |
| Injection Volume: | 20.00 ul       | Channel Name:    | 2487Channel 1        |
| Run Time:         | 120.00 Minutes | Channel Desc.:   |                      |
| Column Type:      |                | Sample Set Name: |                      |

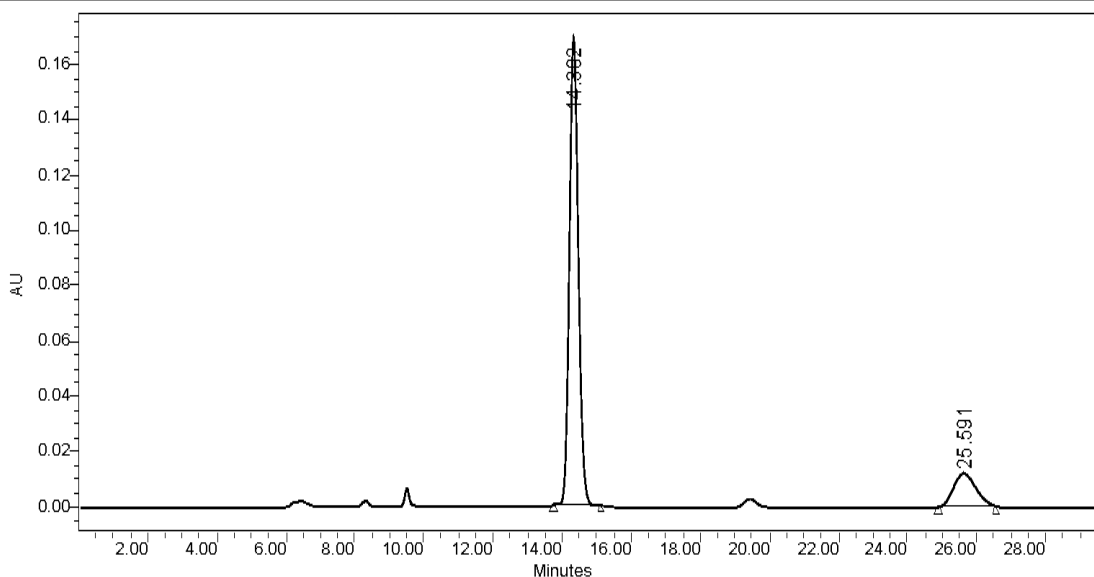

|   | RT (min) | Area (∇*sec) | % Area | Height (∇) | % Height |
|---|----------|--------------|--------|------------|----------|
| 1 | 14.302   | 3043075      | 84.82  | 168756     | 93.35    |
| 2 | 25.591   | 544549       | 15.18  | 12024      | 6.65     |

SAMPLE INFORMATION

|                   |                |                  |                      |
|-------------------|----------------|------------------|----------------------|
| Sample Name:      | VCL-276-5 IC   | Acquired By:     | System               |
| Sample Type:      | Unknown        | Date Acquired:   | 8/27/2018 4:03:38 PM |
| Vial:             | 1              | Acq. Method:     | 90 a 10 05ml 220 254 |
| Injection #:      | 2              | Date Processed:  | 8/27/2018 4:54:10 PM |
| Injection Volume: | 20.00 ul       | Channel Name:    | 2487Channel 1        |
| Run Time:         | 120.00 Minutes | Channel Desc.:   |                      |
| Column Type:      |                | Sample Set Name: |                      |

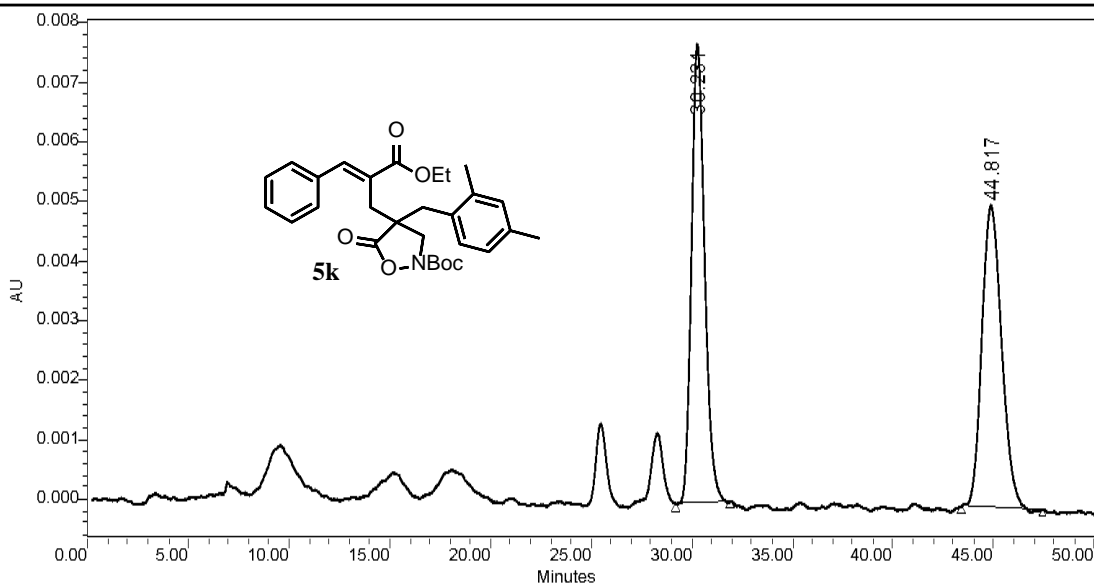

|   | RT (min) | Area (V*sec) | % Area | Height (V) | % Height |
|---|----------|--------------|--------|------------|----------|
| 1 | 30.231   | 349445       | 50.21  | 7691       | 60.25    |
| 2 | 44.817   | 346483       | 49.79  | 5074       | 39.75    |



SAMPLE INFORMATION

|                   |                |                  |                      |
|-------------------|----------------|------------------|----------------------|
| Sample Name:      | VCL-299 IC     | Acquired By:     | System               |
| Sample Type:      | Unknown        | Date Acquired:   | 8/27/2018 3:04:46 PM |
| Vial:             | 1              | Acq. Method:     | 90 a 10 05ml 220 254 |
| Injection #:      | 1              | Date Processed:  | 8/27/2018 4:54:45 PM |
| Injection Volume: | 20.00 ul       | Channel Name:    | 2487Channel 1        |
| Run Time:         | 120.00 Minutes | Channel Desc.:   |                      |
| Column Type:      |                | Sample Set Name: |                      |

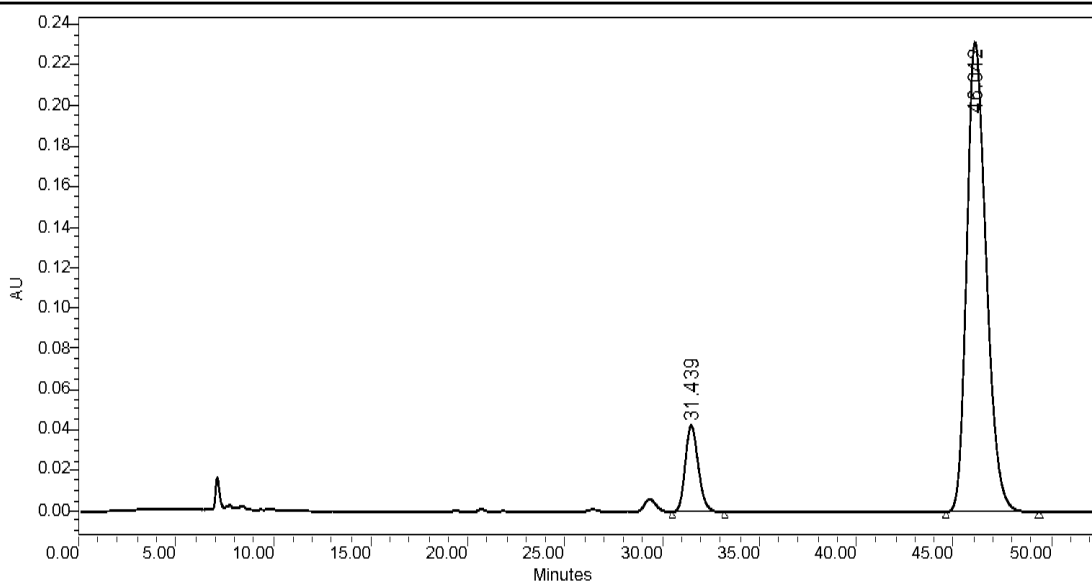

|   | RT (min) | Area (Δ*sec) | % Area | Height (Δ) | % Height |
|---|----------|--------------|--------|------------|----------|
| 1 | 31.439   | 1989204      | 10.97  | 42587      | 15.54    |
| 2 | 46.042   | 16137731     | 89.03  | 231454     | 84.46    |

SAMPLE INFORMATION

|                   |                |                  |                      |
|-------------------|----------------|------------------|----------------------|
| Sample Name:      | VCL-251-2 AD-H | Acquired By:     | System               |
| Sample Type:      | Unknown        | Date Acquired:   | 8/22/2018 4:37:48 PM |
| Vial:             | 1              | Acq. Method:     | 80 a 20 05ml 254 220 |
| Injection #:      | 3              | Date Processed:  | 8/30/2018 1:11:04 PM |
| Injection Volume: | 20.00 ul       | Channel Name:    | 2487Channel 1        |
| Run Time:         | 120.00 Minutes | Channel Desc.:   |                      |
| Column Type:      |                | Sample Set Name: |                      |

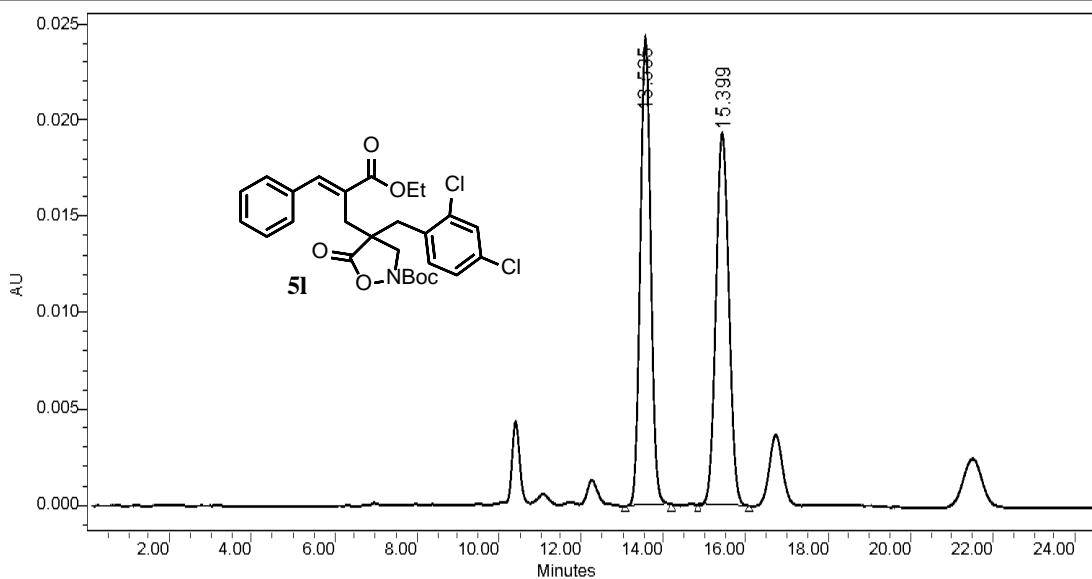

|   | RT (min) | Area (V*sec) | % Area | Height (V) | % Height |
|---|----------|--------------|--------|------------|----------|
| 1 | 13.535   | 428075       | 50.20  | 24244      | 55.63    |
| 2 | 15.399   | 424651       | 49.80  | 19339      | 44.37    |

SAMPLE INFORMATION

|                   |                |                  |                      |
|-------------------|----------------|------------------|----------------------|
| Sample Name:      | VCL-293-6 AD-H | Acquired By:     | System               |
| Sample Type:      | Unknown        | Date Acquired:   | 8/22/2018 3:41:20 PM |
| Vial:             | 1              | Acq. Method:     | 80 a 20 05ml 254 220 |
| Injection #:      | 1              | Date Processed:  | 8/30/2018 1:18:56 PM |
| Injection Volume: | 20.00 ul       | Channel Name:    | 2487Channel 1        |
| Run Time:         | 120.00 Minutes | Channel Desc.:   |                      |
| Column Type:      |                | Sample Set Name: |                      |

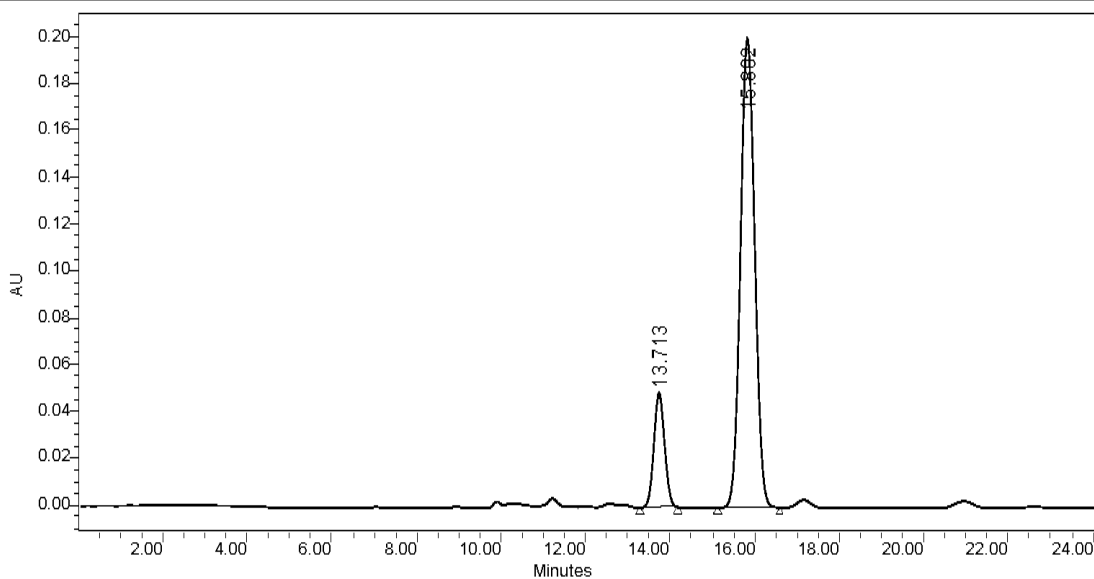

|   | RT (min) | Area (∇*sec) | % Area | Height (∇) | % Height |
|---|----------|--------------|--------|------------|----------|
| 1 | 13.713   | 863178       | 15.51  | 48854      | 19.61    |
| 2 | 15.802   | 4702193      | 84.49  | 200323     | 80.39    |

**6 VCL-243-01-01 80/20 0,5 ml/min**

|                  |                                |                     |          |
|------------------|--------------------------------|---------------------|----------|
| Sample Name:     | VCL-243-01-01 80/20 0,5 ml/min | Injection Volume:   | 20,0     |
| Vial Number:     | RA1                            | Channel:            | UV_VIS_1 |
| Sample Type:     | unknown                        | Wavelength:         | 220      |
| Control Program: | YMC60min_80-20_flow0,5         | Bandwidth:          | 4        |
| Quantif. Method: | default                        | Temperature/Column: | 10       |
| Recording Time:  | 11.6.2018 15:32                | Flow ml/min:        | 0,500    |
| Run Time (min):  | 57,85                          | Sample Amount:      | 1,0000   |

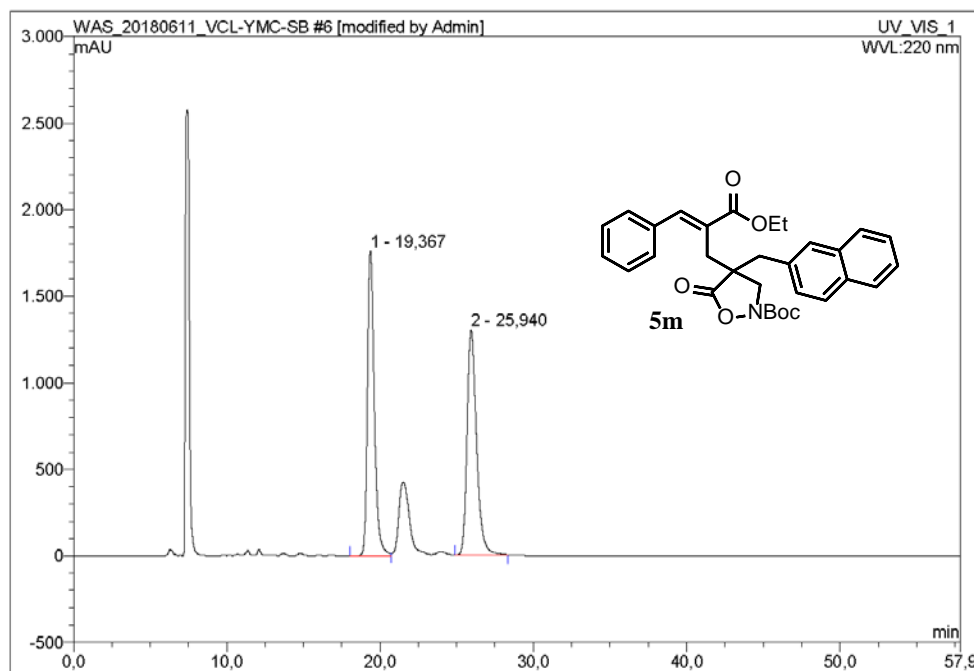

| No.           | Ret.Time<br>min | Peak Name | Height<br>mAU | Area<br>mAU*min | Rel.Area<br>% | Amount | Type |
|---------------|-----------------|-----------|---------------|-----------------|---------------|--------|------|
| 1             | 19,37           | n.a.      | 1760,992      | 917,903         | 49,55         | n.a.   | BM * |
| 2             | 25,94           | n.a.      | 1301,805      | 934,714         | 50,45         | n.a.   | BMB* |
| <b>Total:</b> |                 |           | 3062,798      | 1852,618        | 100,00        | 0,000  |      |

**1 VCL-264-01-01 90/10 0,5 ml/min**

|                  |                                       |                     |                 |
|------------------|---------------------------------------|---------------------|-----------------|
| Sample Name:     | <b>VCL-264-01-01 90/10 0,5 ml/min</b> | Injection Volume:   | <b>20,0</b>     |
| Vial Number:     | <b>RA2</b>                            | Channel:            | <b>UV_VIS_1</b> |
| Sample Type:     | <b>unknown</b>                        | Wavelength:         | <b>220</b>      |
| Control Program: | <b>YMC40min_80-20_flow0,5</b>         | Bandwidth:          | <b>4</b>        |
| Quantif. Method: | <b>default</b>                        | Temperature/Column: | <b>10</b>       |
| Recording Time:  | <b>27.6.2018 14:01</b>                | Flow ml/min:        | <b>0,500</b>    |
| Run Time (min):  | <b>40,00</b>                          | Sample Amount:      | <b>1,0000</b>   |

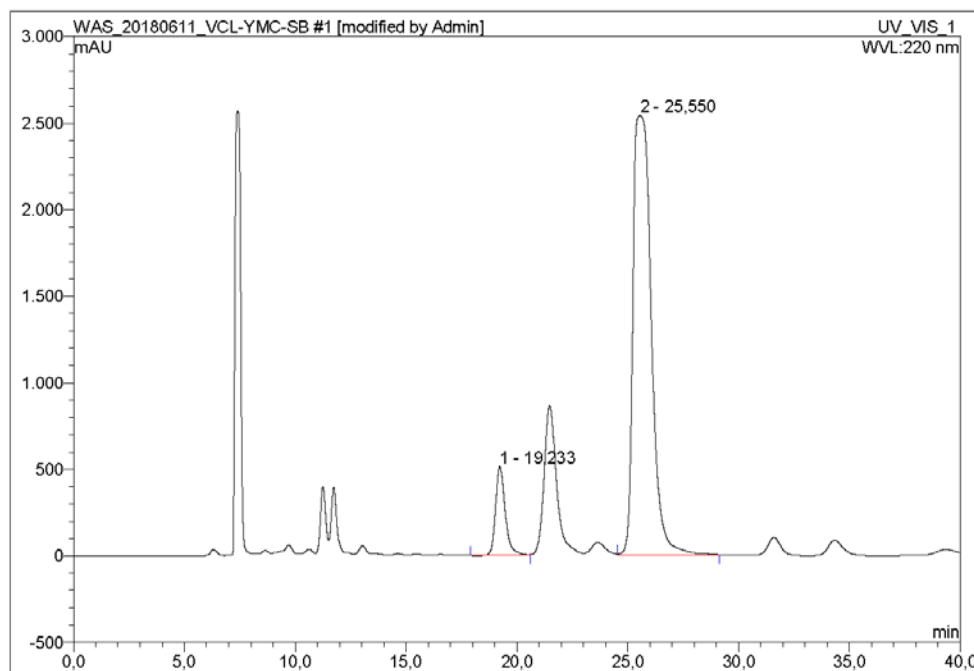

| No.           | Ret.Time<br>min | Peak Name | Height<br>mAU | Area<br>mAU*min | Rel.Area<br>% | Amount | Type |
|---------------|-----------------|-----------|---------------|-----------------|---------------|--------|------|
| 1             | 19,23           | n.a.      | 511,766       | 254,128         | 9,49          | n.a.   | BMB* |
| 2             | 25,55           | n.a.      | 2541,047      | 2422,918        | 90,51         | n.a.   | MB*  |
| <b>Total:</b> |                 |           | 3052,813      | 2677,046        | 100,00        | 0,000  |      |

SAMPLE INFORMATION

|                   |                |                  |                        |
|-------------------|----------------|------------------|------------------------|
| Sample Name:      | VCL-256 racemo | Acquired By:     | System                 |
| Sample Type:      | Unknown        | Date Acquired:   | 10/10/2018 12:00:15 PM |
| Vial:             | 1              | Acq. Method:     | 80 20 1 ml 254 nm      |
| Injection #:      | 4              | Date Processed:  | 10/10/2018 12:36:35 PM |
| Injection Volume: | 20.00 ul       | Channel Name:    | 2487Channel 1          |
| Run Time:         | 120.00 Minutes | Channel Desc.:   |                        |
| Column Type:      |                | Sample Set Name: |                        |

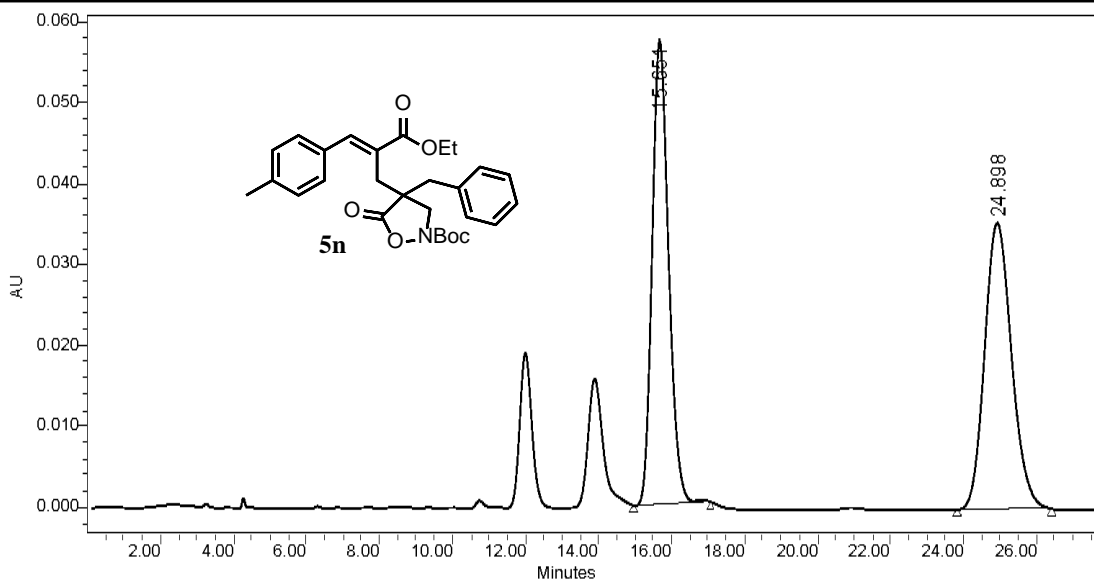

|   | RT (min) | Area (∇*sec) | % Area | Height (∇) | % Height |
|---|----------|--------------|--------|------------|----------|
| 1 | 15.651   | 1795796      | 49.74  | 57282      | 61.82    |
| 2 | 24.898   | 1814284      | 50.26  | 35371      | 38.18    |

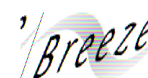

SAMPLE INFORMATION

|                   |                |                  |                        |
|-------------------|----------------|------------------|------------------------|
| Sample Name:      | 5N-295         | Acquired By:     | System                 |
| Sample Type:      | Unknown        | Date Acquired:   | 10/10/2018 11:28:18 AM |
| Vial:             | 1              | Acq. Method:     | 80 20 1 ml 254 nm      |
| Injection #:      | 3              | Date Processed:  | 10/10/2018 12:37:24 PM |
| Injection Volume: | 20.00 ul       | Channel Name:    | 2487Channel 1          |
| Run Time:         | 120.00 Minutes | Channel Desc.:   |                        |
| Column Type:      |                | Sample Set Name: |                        |

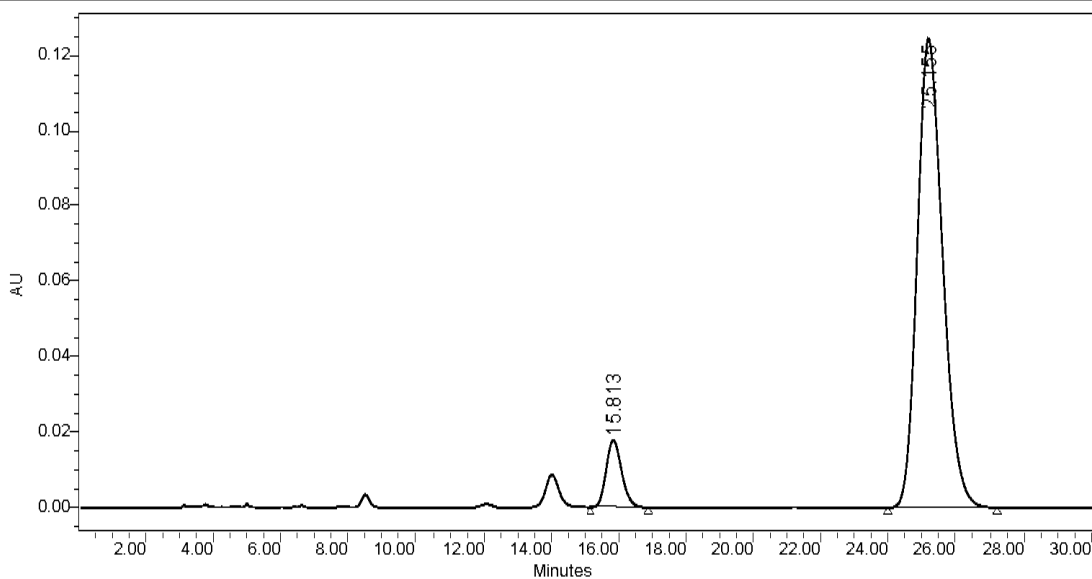

|   | RT (min) | Area (∇*sec) | % Area | Height (∇) | % Height |
|---|----------|--------------|--------|------------|----------|
| 1 | 15.813   | 575139       | 8.08   | 17845      | 12.50    |
| 2 | 25.155   | 6543151      | 91.92  | 124890     | 87.50    |

SAMPLE INFORMATION

|                   |                  |                  |                       |
|-------------------|------------------|------------------|-----------------------|
| Sample Name:      | VCL-278 RAC AD-H | Acquired By:     | System                |
| Sample Type:      | Unknown          | Date Acquired:   | 7/27/2018 1:04:43 PM  |
| Vial:             | 1                | Acq. Method:     | 80 20 05ml 254e270 nm |
| Injection #:      | 3                | Date Processed:  | 8/3/2018 6:32:56 PM   |
| Injection Volume: | 20.00 ul         | Channel Name:    | 2487Channel 1         |
| Run Time:         | 120.00 Minutes   | Channel Desc.:   |                       |
| Column Type:      |                  | Sample Set Name: |                       |

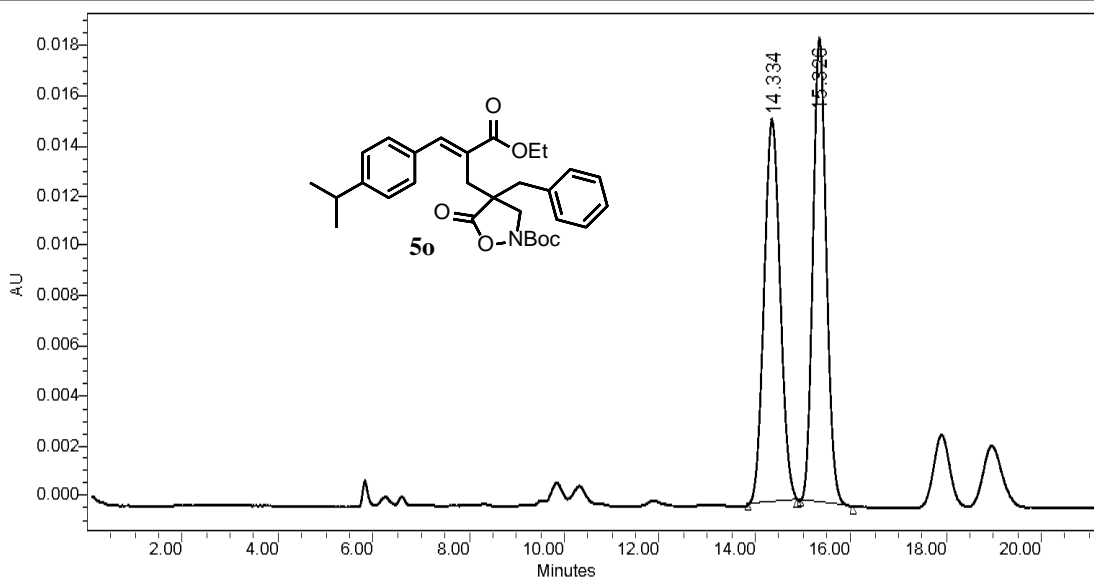

|   | RT (min) | Area (V*sec) | % Area | Height (V) | % Height |
|---|----------|--------------|--------|------------|----------|
| 1 | 14.334   | 359303       | 49.90  | 15301      | 45.17    |
| 2 | 15.326   | 360782       | 50.10  | 18571      | 54.83    |





SAMPLE INFORMATION

|                   |                |                  |                      |
|-------------------|----------------|------------------|----------------------|
| Sample Name:      | VCL-294-2 AD-H | Acquired By:     | System               |
| Sample Type:      | Unknown        | Date Acquired:   | 8/24/2018 3:31:39 PM |
| Vial:             | 1              | Acq. Method:     | 80 a 20 05ml 254 220 |
| Injection #:      | 1              | Date Processed:  | 8/30/2018 1:19:57 PM |
| Injection Volume: | 20.00 ul       | Channel Name:    | 2487Channel 1        |
| Run Time:         | 120.00 Minutes | Channel Desc.:   |                      |
| Column Type:      |                | Sample Set Name: |                      |

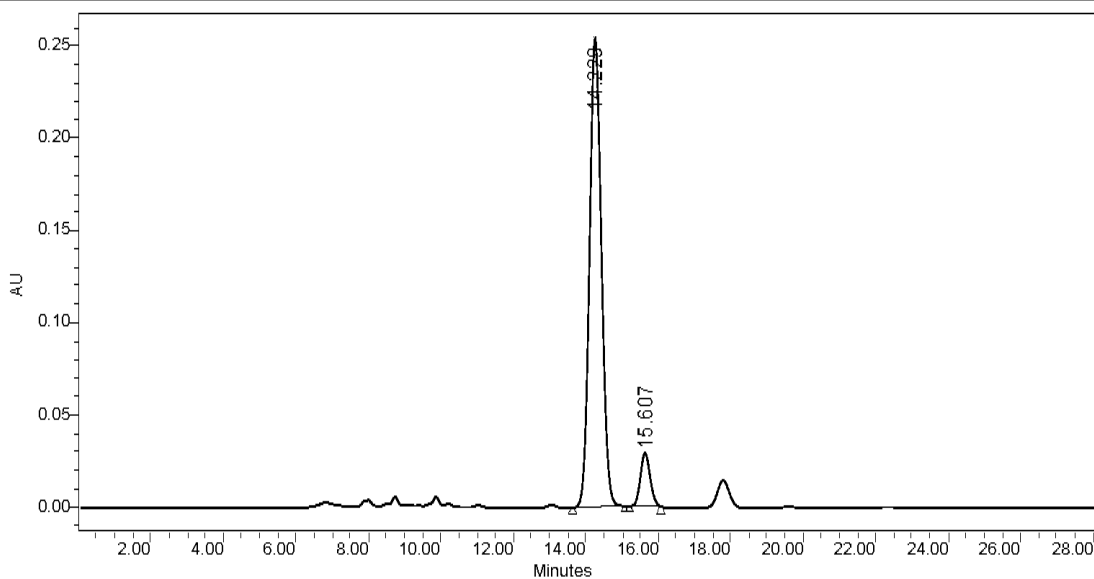

|   | RT (min) | Area (∇*sec) | % Area | Height (∇) | % Height |
|---|----------|--------------|--------|------------|----------|
| 1 | 14.229   | 5829252      | 91.46  | 254208     | 89.73    |
| 2 | 15.607   | 544339       | 8.54   | 29100      | 10.27    |

SAMPLE INFORMATION

|                   |                |                  |                      |
|-------------------|----------------|------------------|----------------------|
| Sample Name:      | VCL-291-2 IC   | Acquired By:     | System               |
| Sample Type:      | Unknown        | Date Acquired:   | 8/22/2018 2:03:16 PM |
| Vial:             | 1              | Acq. Method:     | 80 20 1 ml 254 nm    |
| Injection #:      | 5              | Date Processed:  | 8/30/2018 1:12:23 PM |
| Injection Volume: | 20.00 ul       | Channel Name:    | 2487Channel 1        |
| Run Time:         | 120.00 Minutes | Channel Desc.:   |                      |
| Column Type:      |                | Sample Set Name: |                      |

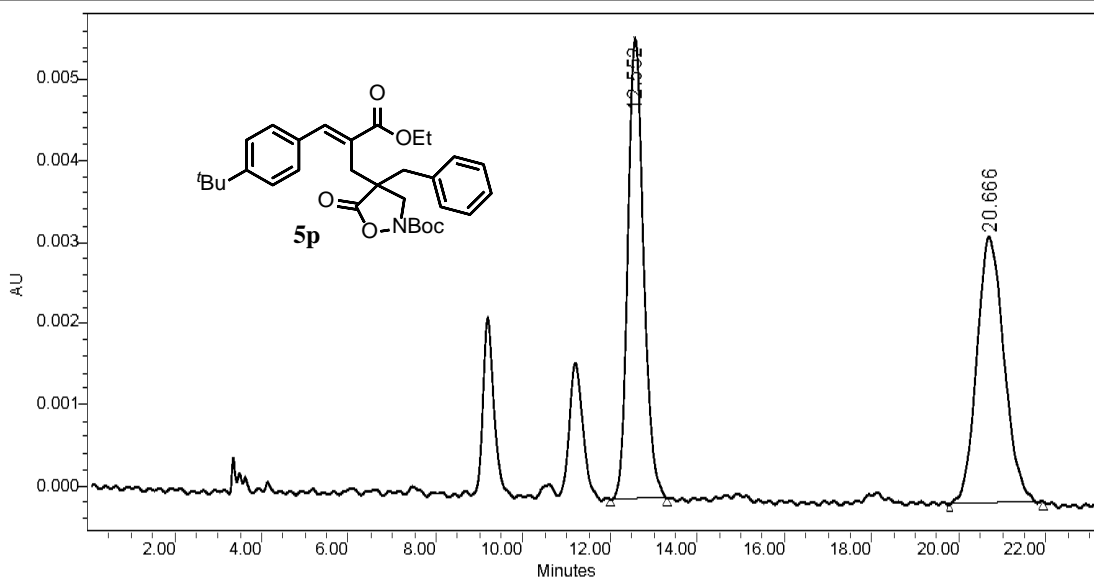

|   | RT (min) | Area (AU*sec) | % Area | Height (AU) | % Height |
|---|----------|---------------|--------|-------------|----------|
| 1 | 12.552   | 142829        | 49.93  | 5663        | 63.33    |
| 2 | 20.666   | 143215        | 50.07  | 3279        | 36.67    |

SAMPLE INFORMATION

|                   |                |                  |                      |
|-------------------|----------------|------------------|----------------------|
| Sample Name:      | VCL-297-6-2 IC | Acquired By:     | System               |
| Sample Type:      | Unknown        | Date Acquired:   | 8/22/2018 1:35:34 PM |
| Vial:             | 1              | Acq. Method:     | 80 20 1 ml 254 nm    |
| Injection #:      | 4              | Date Processed:  | 8/30/2018 1:12:51 PM |
| Injection Volume: | 20.00 ul       | Channel Name:    | 2487Channel 1        |
| Run Time:         | 120.00 Minutes | Channel Desc.:   |                      |
| Column Type:      |                | Sample Set Name: |                      |

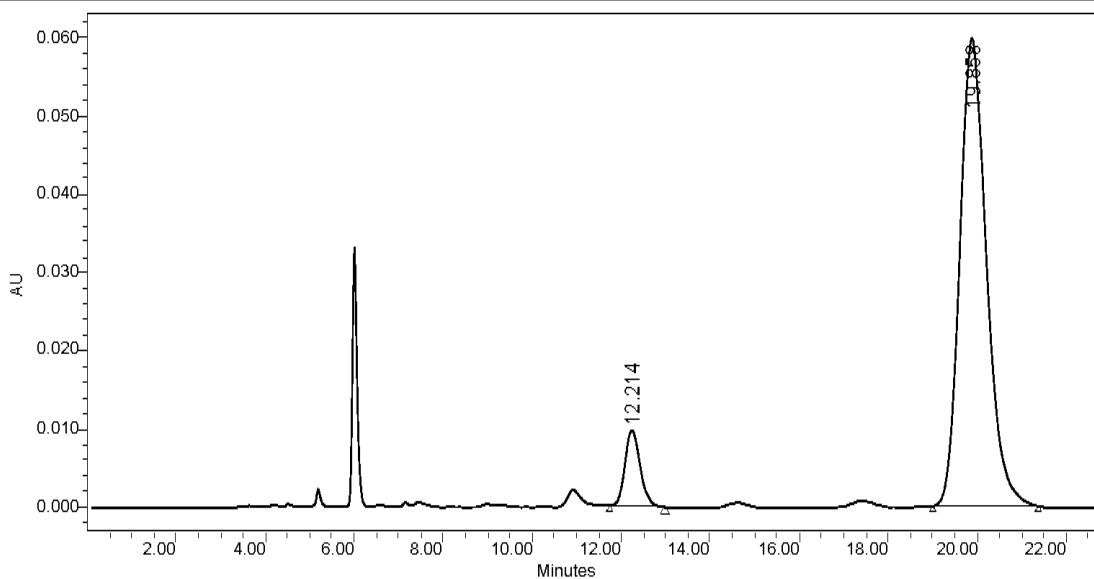

|   | RT (min) | Area (∇*sec) | % Area | Height (∇) | % Height |
|---|----------|--------------|--------|------------|----------|
| 1 | 12.214   | 231651       | 8.52   | 9721       | 13.98    |
| 2 | 19.858   | 2486329      | 91.48  | 59830      | 86.02    |

SAMPLE INFORMATION

|                   |                |                  |                       |
|-------------------|----------------|------------------|-----------------------|
| Sample Name:      | VCL-277-2 IC   | Acquired By:     | System                |
| Sample Type:      | Unknown        | Date Acquired:   | 8/23/2018 11:47:51 AM |
| Vial:             | 1              | Acq. Method:     | 80 20 1 ml 254 nm     |
| Injection #:      | 1              | Date Processed:  | 8/30/2018 1:08:05 PM  |
| Injection Volume: | 20.00 ul       | Channel Name:    | 2487Channel 1         |
| Run Time:         | 120.00 Minutes | Channel Desc.:   |                       |
| Column Type:      |                | Sample Set Name: |                       |

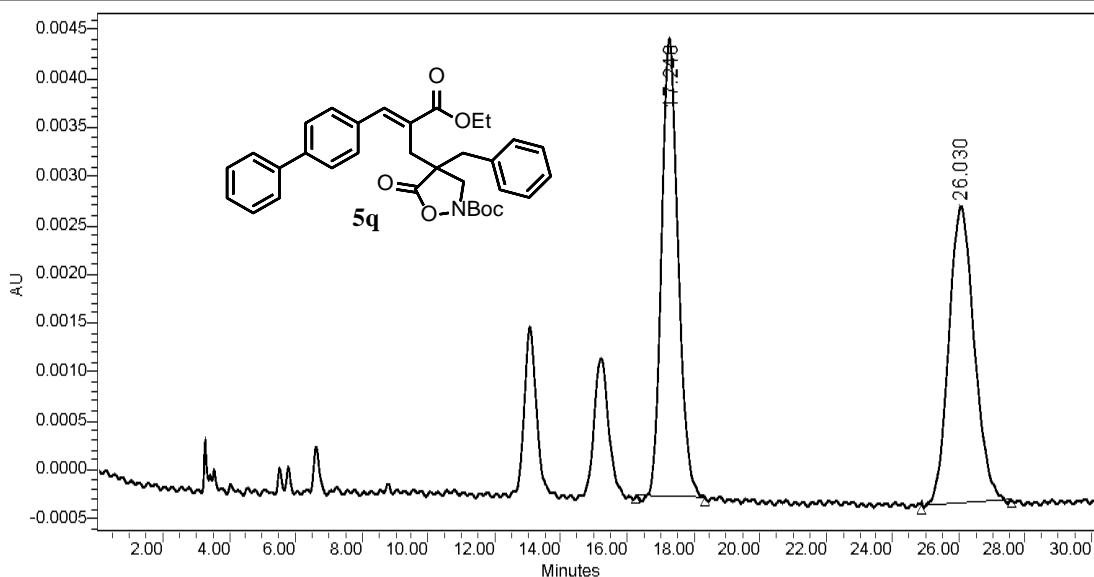

|   | RT (min) | Area (AU*sec) | % Area | Height (AU) | % Height |
|---|----------|---------------|--------|-------------|----------|
| 1 | 17.240   | 163544        | 50.02  | 4692        | 60.60    |
| 2 | 26.030   | 163409        | 49.98  | 3050        | 39.40    |

SAMPLE INFORMATION

|                   |                |                  |                       |
|-------------------|----------------|------------------|-----------------------|
| Sample Name:      | VCL-282-5 IC   | Acquired By:     | System                |
| Sample Type:      | Unknown        | Date Acquired:   | 8/23/2018 12:21:27 PM |
| Vial:             | 1              | Acq. Method:     | 80 20 1 ml 254 nm     |
| Injection #:      | 2              | Date Processed:  | 8/23/2018 1:05:22 PM  |
| Injection Volume: | 20.00 ul       | Channel Name:    | 2487Channel 1         |
| Run Time:         | 120.00 Minutes | Channel Desc.:   |                       |
| Column Type:      |                | Sample Set Name: |                       |

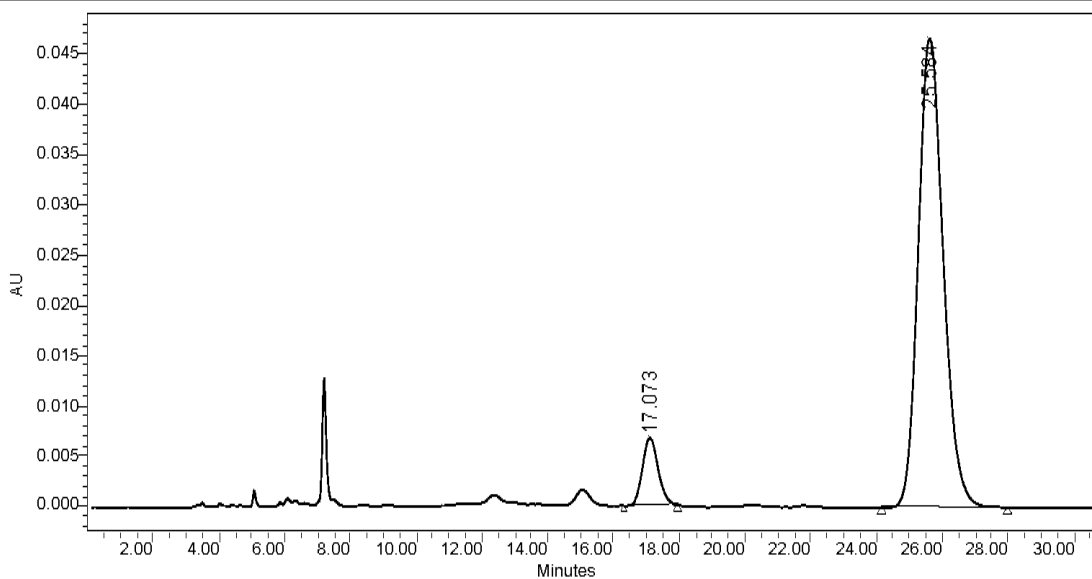

|   | RT (min) | Area (∇*sec) | % Area | Height (∇) | % Height |
|---|----------|--------------|--------|------------|----------|
| 1 | 17.073   | 225519       | 8.38   | 6707       | 12.58    |
| 2 | 25.584   | 2466599      | 91.62  | 46608      | 87.42    |

SAMPLE INFORMATION

|                   |                |                  |                       |
|-------------------|----------------|------------------|-----------------------|
| Sample Name:      | VCL-288-6 IC   | Acquired By:     | System                |
| Sample Type:      | Unknown        | Date Acquired:   | 8/28/2018 12:20:55 PM |
| Vial:             | 1              | Acq. Method:     | 80 20 1 ml 254 nm     |
| Injection #:      | 3              | Date Processed:  | 8/30/2018 1:03:57 PM  |
| Injection Volume: | 20.00 ul       | Channel Name:    | 2487Channel 1         |
| Run Time:         | 120.00 Minutes | Channel Desc.:   |                       |
| Column Type:      |                | Sample Set Name: |                       |

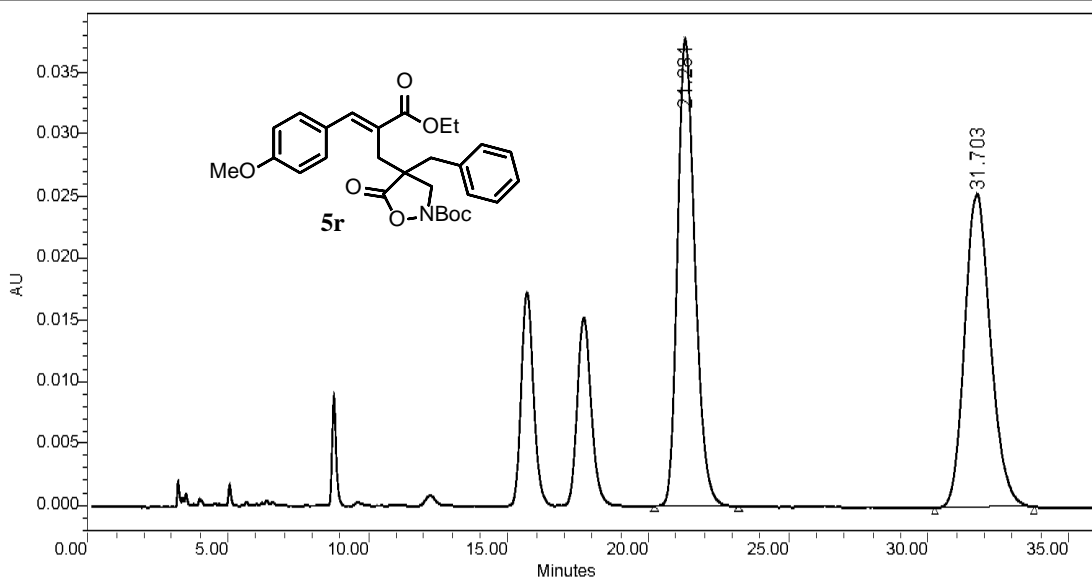

|   | RT (min) | Area (AU*sec) | % Area | Height (AU) | % Height |
|---|----------|---------------|--------|-------------|----------|
| 1 | 21.281   | 1633086       | 50.03  | 37790       | 59.88    |
| 2 | 31.703   | 1631309       | 49.97  | 25317       | 40.12    |

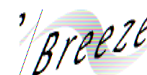

SAMPLE INFORMATION

|                   |                |                  |                        |
|-------------------|----------------|------------------|------------------------|
| Sample Name:      | 5R-298         | Acquired By:     | System                 |
| Sample Type:      | Unknown        | Date Acquired:   | 10/10/2018 12:32:56 PM |
| Vial:             | 1              | Acq. Method:     | 80 20 1 ml 254 nm      |
| Injection #:      | 5              | Date Processed:  | 10/10/2018 1:10:08 PM  |
| Injection Volume: | 20.00 ul       | Channel Name:    | 2487Channel 1          |
| Run Time:         | 120.00 Minutes | Channel Desc.:   |                        |
| Column Type:      |                | Sample Set Name: |                        |

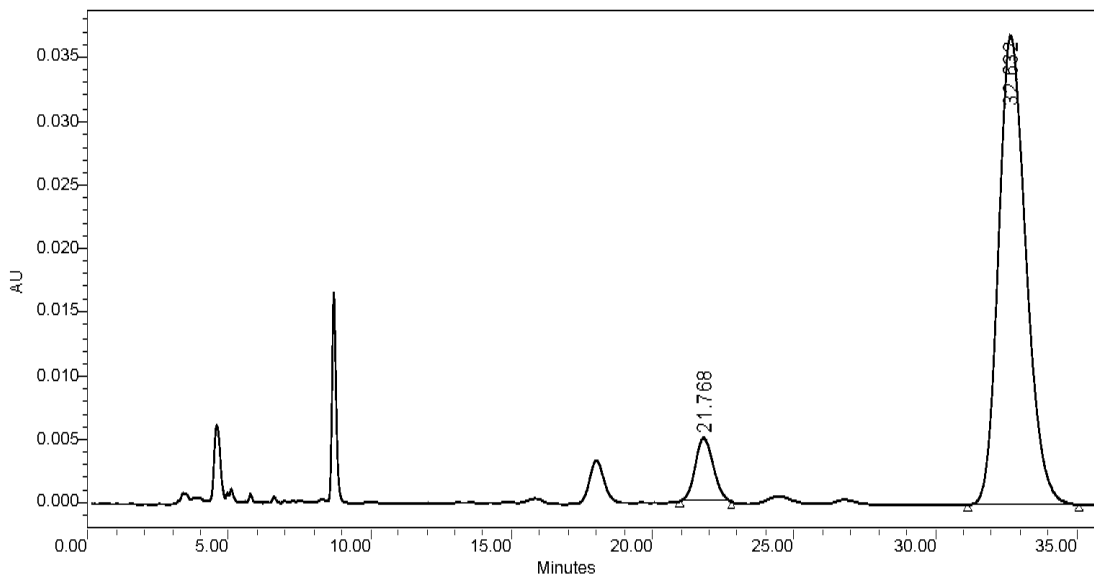

|   | RT (min) | Area (∇*sec) | % Area | Height (∇) | % Height |
|---|----------|--------------|--------|------------|----------|
| 1 | 21.768   | 225104       | 8.29   | 5006       | 11.95    |
| 2 | 32.632   | 2491626      | 91.71  | 36876      | 88.05    |

SAMPLE INFORMATION

|                   |                  |                  |                      |
|-------------------|------------------|------------------|----------------------|
| Sample Name:      | VCL-253 RAC AD-H | Acquired By:     | System               |
| Sample Type:      | Unknown          | Date Acquired:   | 8/1/2018 11:14:35 AM |
| Vial:             | 1                | Acq. Method:     | 80 a 20 05ml 254 220 |
| Injection #:      | 4                | Date Processed:  | 8/3/2018 6:28:21 PM  |
| Injection Volume: | 20.00 ul         | Channel Name:    | 2487Channel 1        |
| Run Time:         | 120.00 Minutes   | Channel Desc.:   |                      |
| Column Type:      |                  | Sample Set Name: |                      |

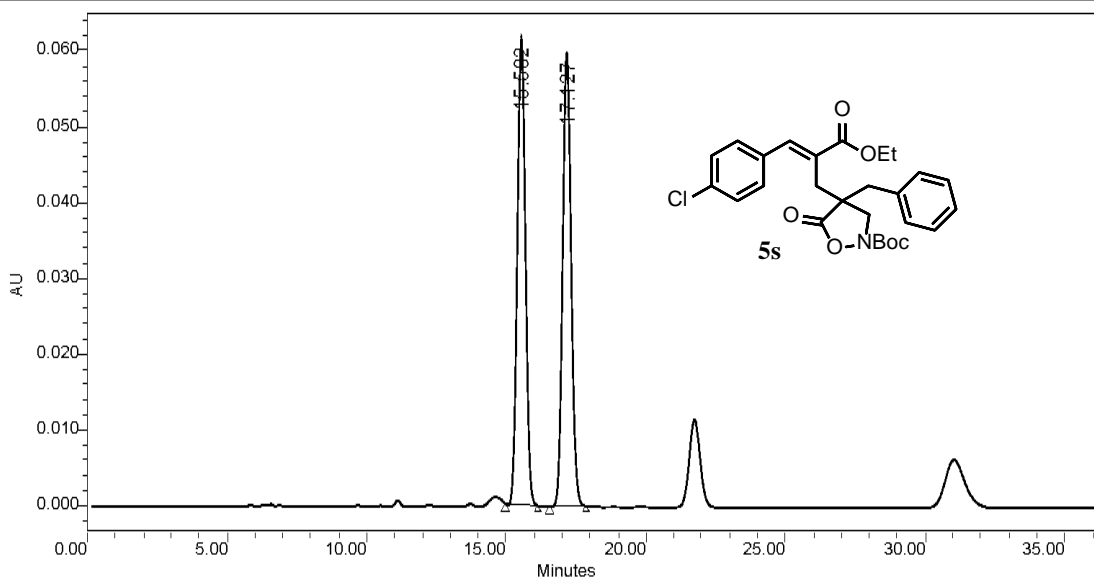

|   | RT (min) | Area (∇*sec) | % Area | Height (∇) | % Height |
|---|----------|--------------|--------|------------|----------|
| 1 | 15.502   | 1249429      | 49.74  | 61495      | 50.69    |
| 2 | 17.127   | 1262489      | 50.26  | 59812      | 49.31    |





SAMPLE INFORMATION

|                   |                |                  |                      |
|-------------------|----------------|------------------|----------------------|
| Sample Name:      | VCL-300 AD-H   | Acquired By:     | System               |
| Sample Type:      | Unknown        | Date Acquired:   | 8/28/2018 1:46:11 PM |
| Vial:             | 1              | Acq. Method:     | 80 a 20 05ml 254 220 |
| Injection #:      | 1              | Date Processed:  | 8/28/2018 2:33:33 PM |
| Injection Volume: | 20.00 ul       | Channel Name:    | 2487Channel 1        |
| Run Time:         | 120.00 Minutes | Channel Desc.:   |                      |
| Column Type:      |                | Sample Set Name: |                      |

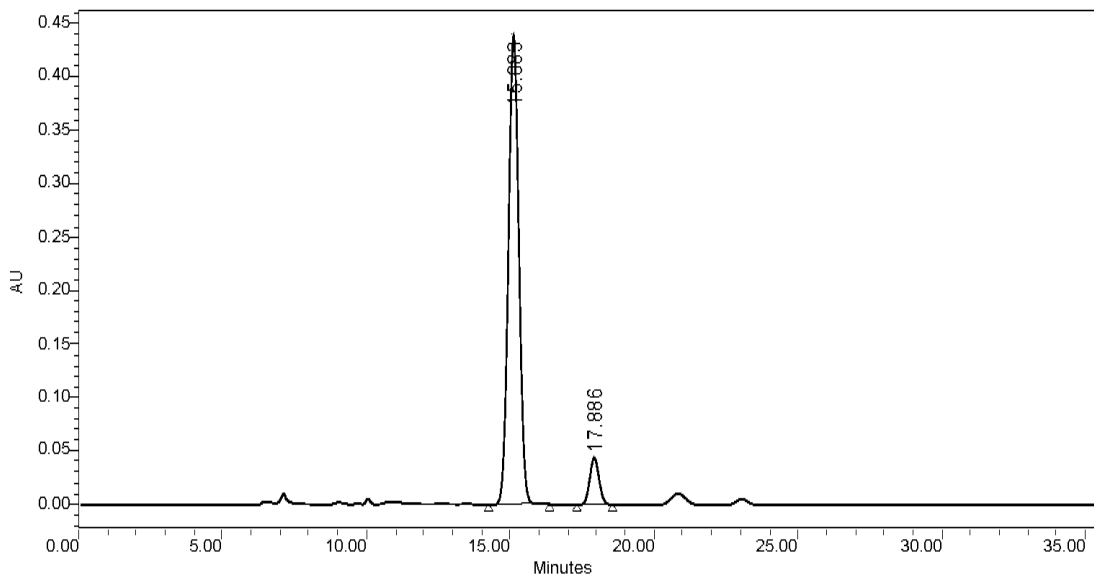

|   | RT (min) | Area (Δ*sec) | % Area | Height (Δ) | % Height |
|---|----------|--------------|--------|------------|----------|
| 1 | 15.083   | 11136016     | 91.72  | 439088     | 90.82    |
| 2 | 17.886   | 1005129      | 8.28   | 44387      | 9.18     |

SAMPLE INFORMATION

|                   |                  |                  |                      |
|-------------------|------------------|------------------|----------------------|
| Sample Name:      | VCL-254 RAC AD-H | Acquired By:     | System               |
| Sample Type:      | Unknown          | Date Acquired:   | 8/1/2018 10:10:19 AM |
| Vial:             | 1                | Acq. Method:     | 80 a 20 05ml 254 220 |
| Injection #:      | 2                | Date Processed:  | 8/3/2018 6:20:12 PM  |
| Injection Volume: | 20.00 ul         | Channel Name:    | 2487Channel 1        |
| Run Time:         | 120.00 Minutes   | Channel Desc.:   |                      |
| Column Type:      |                  | Sample Set Name: |                      |

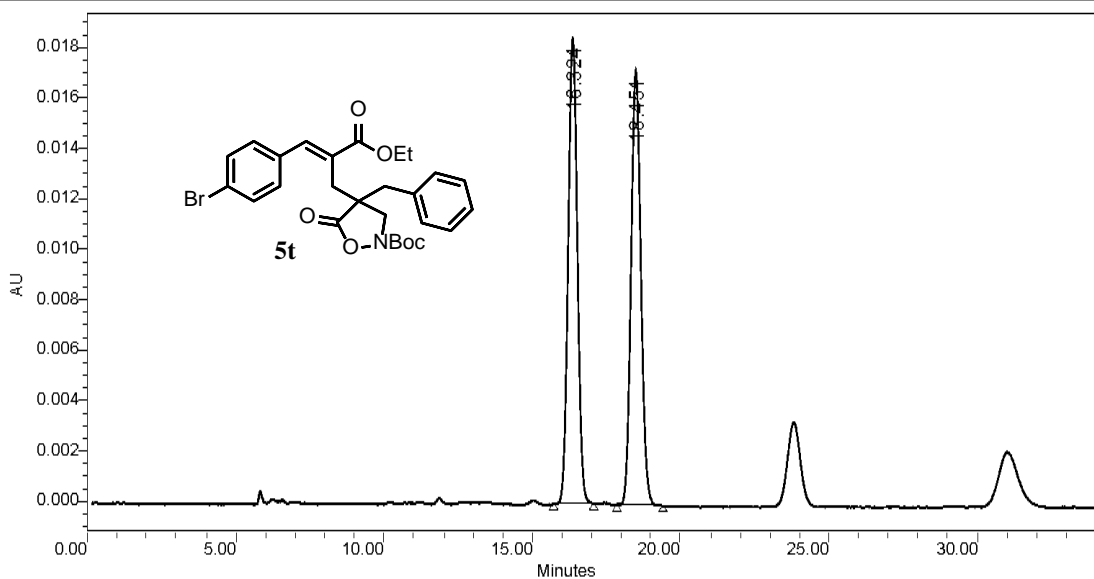

|   | RT (min) | Area (AU*sec) | % Area | Height (AU) | % Height |
|---|----------|---------------|--------|-------------|----------|
| 1 | 16.324   | 397613        | 49.99  | 18476       | 51.70    |
| 2 | 18.451   | 397744        | 50.01  | 17260       | 48.30    |

SAMPLE INFORMATION

|                   |                |                  |                       |
|-------------------|----------------|------------------|-----------------------|
| Sample Name:      | VCL-296-5t     | Acquired By:     | System                |
| Sample Type:      | Unknown        | Date Acquired:   | 10/9/2018 5:12:41 PM  |
| Vial:             | 1              | Acq. Method:     | 80 20 05ml 254e270 nm |
| Injection #:      | 4              | Date Processed:  | 10/9/2018 6:58:28 PM  |
| Injection Volume: | 20.00 ul       | Channel Name:    | 2487Channel 1         |
| Run Time:         | 120.00 Minutes | Channel Desc.:   |                       |
| Column Type:      |                | Sample Set Name: |                       |

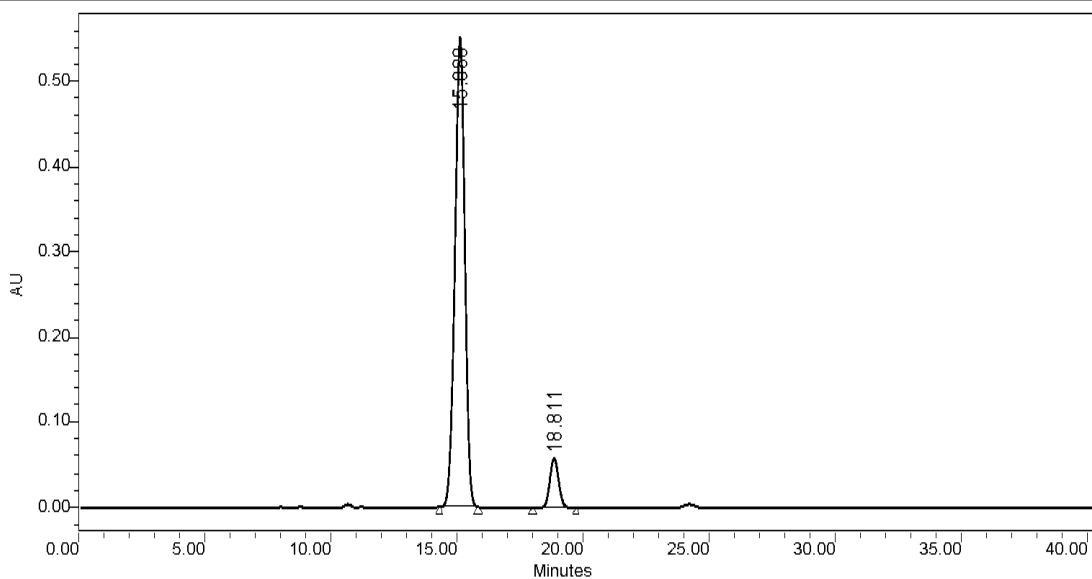

|   | RT (min) | Area (Δ*sec) | % Area | Height (Δ) | % Height |
|---|----------|--------------|--------|------------|----------|
| 1 | 15.088   | 15036734     | 91.24  | 550360     | 90.41    |
| 2 | 18.811   | 1442844      | 8.76   | 58386      | 9.59     |

SAMPLE INFORMATION

|                   |                    |                  |                      |
|-------------------|--------------------|------------------|----------------------|
| Sample Name:      | VCL-287 RAC-2 AD-H | Acquired By:     | System               |
| Sample Type:      | Unknown            | Date Acquired:   | 8/3/2018 3:18:47 PM  |
| Vial:             | 1                  | Acq. Method:     | 80 a 20 05ml 254 220 |
| Injection #:      | 1                  | Date Processed:  | 8/3/2018 6:43:40 PM  |
| Injection Volume: | 20.00 ul           | Channel Name:    | 2487Channel 1        |
| Run Time:         | 120.00 Minutes     | Channel Desc.:   |                      |
| Column Type:      |                    | Sample Set Name: |                      |

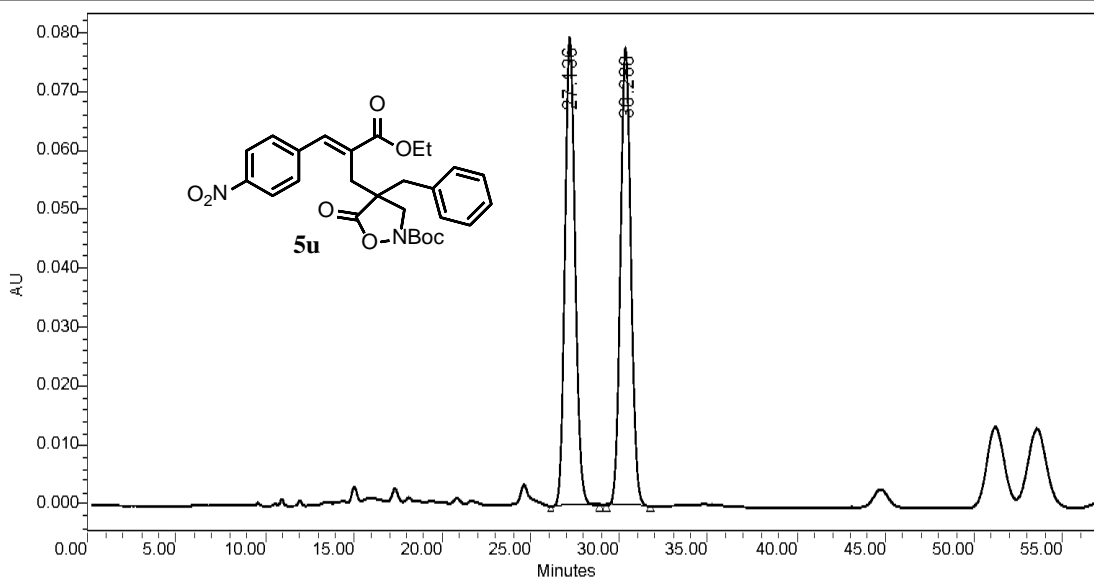

|   | RT (min) | Area (∇*sec) | % Area | Height (∇) | % Height |
|---|----------|--------------|--------|------------|----------|
| 1 | 27.136   | 3175290      | 49.92  | 79198      | 50.53    |
| 2 | 30.280   | 3185627      | 50.08  | 77548      | 49.47    |



SAMPLE INFORMATION

|                   |                |                  |                       |
|-------------------|----------------|------------------|-----------------------|
| Sample Name:      | VCL-285-7 AD-H | Acquired By:     | System                |
| Sample Type:      | Unknown        | Date Acquired:   | 8/24/2018 11:31:04 AM |
| Vial:             | 1              | Acq. Method:     | 80 a 20 05ml 254 220  |
| Injection #:      | 1              | Date Processed:  | 8/30/2018 1:19:35 PM  |
| Injection Volume: | 20.00 ul       | Channel Name:    | 2487Channel 1         |
| Run Time:         | 120.00 Minutes | Channel Desc.:   |                       |
| Column Type:      |                | Sample Set Name: |                       |

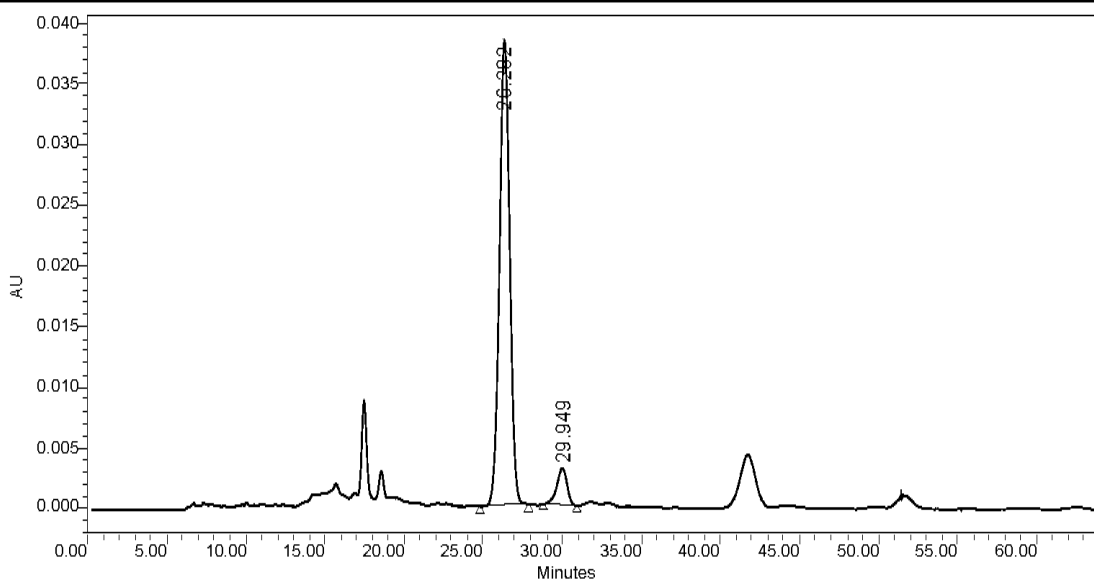

|   | RT (min) | Area (∇*sec) | % Area | Height (∇) | % Height |
|---|----------|--------------|--------|------------|----------|
| 1 | 26.282   | 1723515      | 92.63  | 38339      | 92.64    |
| 2 | 29.949   | 137030       | 7.37   | 3045       | 7.36     |

SAMPLE INFORMATION

|                   |                |                  |                       |
|-------------------|----------------|------------------|-----------------------|
| Sample Name:      | VCL-290 rac IC | Acquired By:     | System                |
| Sample Type:      | Unknown        | Date Acquired:   | 8/22/2018 11:17:13 AM |
| Vial:             | 1              | Acq. Method:     | 80 20 1 ml 254 nm     |
| Injection #:      | 1              | Date Processed:  | 8/30/2018 1:14:16 PM  |
| Injection Volume: | 20.00 ul       | Channel Name:    | 2487Channel 1         |
| Run Time:         | 120.00 Minutes | Channel Desc.:   |                       |
| Column Type:      |                | Sample Set Name: |                       |

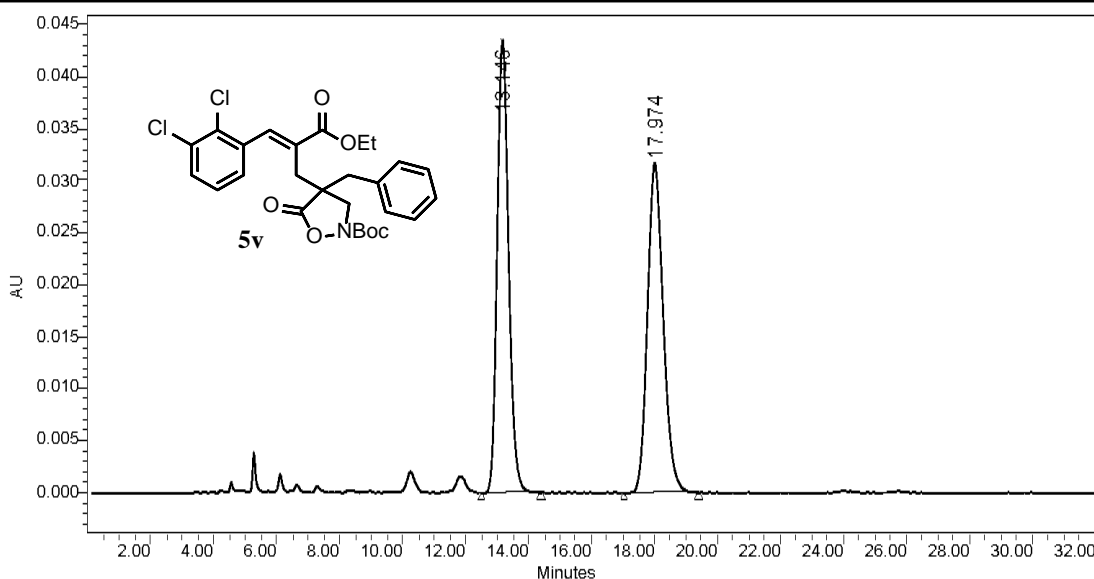

|   | RT (min) | Area (V*sec) | % Area | Height (V) | % Height |
|---|----------|--------------|--------|------------|----------|
| 1 | 13.146   | 1097996      | 49.82  | 43538      | 57.82    |
| 2 | 17.974   | 1105718      | 50.18  | 31755      | 42.18    |



SAMPLE INFORMATION

|                   |                |                  |                       |
|-------------------|----------------|------------------|-----------------------|
| Sample Name:      | VCL-284-5 IC   | Acquired By:     | System                |
| Sample Type:      | Unknown        | Date Acquired:   | 8/22/2018 11:54:04 AM |
| Vial:             | 1              | Acq. Method:     | 80 20 1 ml 254 nm     |
| Injection #:      | 2              | Date Processed:  | 8/30/2018 1:15:46 PM  |
| Injection Volume: | 20.00 ul       | Channel Name:    | 2487Channel 1         |
| Run Time:         | 120.00 Minutes | Channel Desc.:   |                       |
| Column Type:      |                | Sample Set Name: |                       |

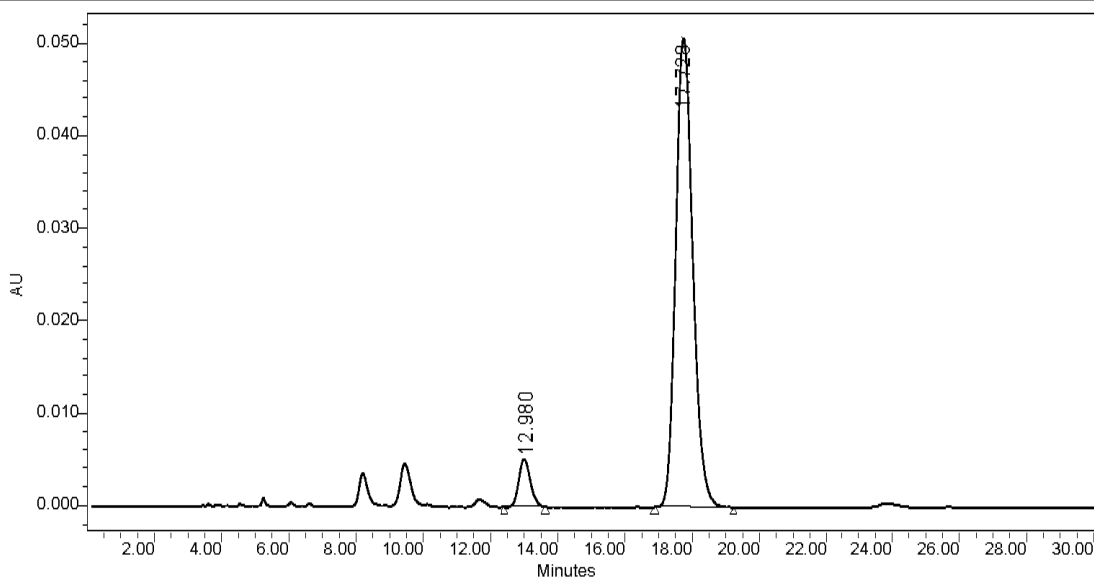

|   | RT (min) | Area (∇*sec) | % Area | Height (∇) | % Height |
|---|----------|--------------|--------|------------|----------|
| 1 | 12.980   | 126506       | 6.55   | 5168       | 9.24     |
| 2 | 17.728   | 1803580      | 93.45  | 50791      | 90.76    |

SAMPLE INFORMATION

|                   |                  |                  |                       |
|-------------------|------------------|------------------|-----------------------|
| Sample Name:      | VCL-255 RAC AD-H | Acquired By:     | System                |
| Sample Type:      | Unknown          | Date Acquired:   | 7/27/2018 12:20:37 PM |
| Vial:             | 1                | Acq. Method:     | 80 20 05ml 254e270 nm |
| Injection #:      | 2                | Date Processed:  | 8/3/2018 6:31:24 PM   |
| Injection Volume: | 20.00 ul         | Channel Name:    | 2487Channel 1         |
| Run Time:         | 120.00 Minutes   | Channel Desc.:   |                       |
| Column Type:      |                  | Sample Set Name: |                       |

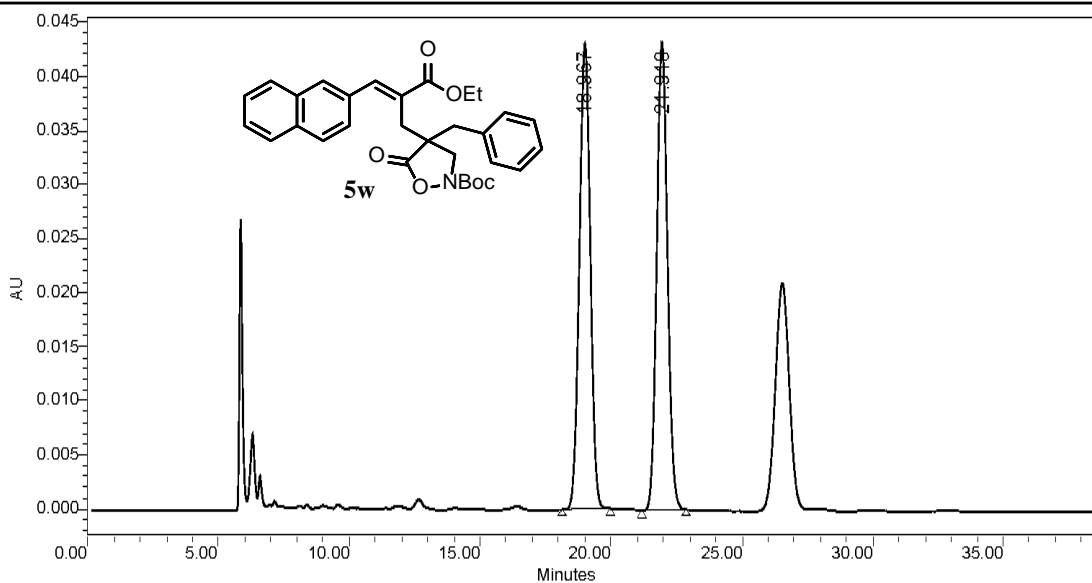

|   | RT (min) | Area (∇*sec) | % Area | Height (∇) | % Height |
|---|----------|--------------|--------|------------|----------|
| 1 | 18.967   | 1248874      | 50.30  | 43001      | 49.86    |
| 2 | 21.910   | 1234037      | 49.70  | 43237      | 50.14    |





SAMPLE INFORMATION

|                   |                |                  |                       |
|-------------------|----------------|------------------|-----------------------|
| Sample Name:      | VCL-283 AD-H   | Acquired By:     | System                |
| Sample Type:      | Unknown        | Date Acquired:   | 7/27/2018 3:54:13 PM  |
| Vial:             | 1              | Acq. Method:     | 80 20 05ml 254e270 nm |
| Injection #:      | 1              | Date Processed:  | 8/3/2018 7:06:52 PM   |
| Injection Volume: | 20.00 ul       | Channel Name:    | 2487Channel 1         |
| Run Time:         | 120.00 Minutes | Channel Desc.:   |                       |
| Column Type:      |                | Sample Set Name: |                       |

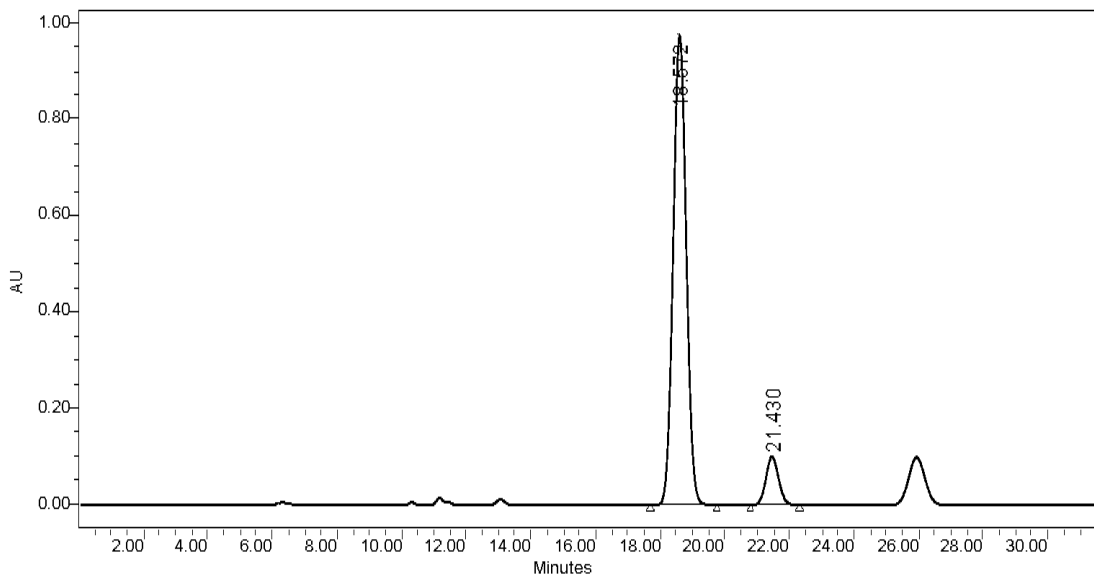

|   | RT (min) | Area (Δ*sec) | % Area | Height (Δ) | % Height |
|---|----------|--------------|--------|------------|----------|
| 1 | 18.572   | 27387298     | 90.78  | 974793     | 90.60    |
| 2 | 21.430   | 2780372      | 9.22   | 101124     | 9.40     |

## 4. X-Ray Analysis of 5f

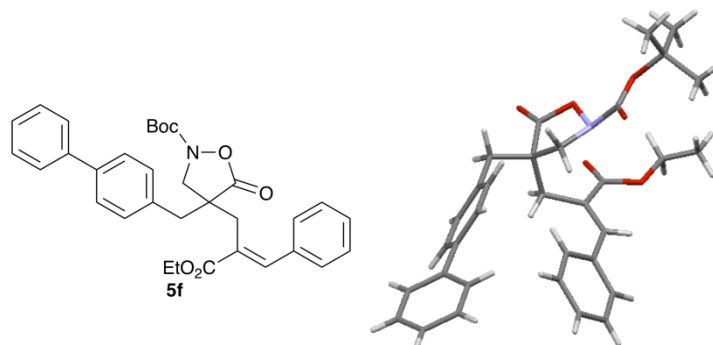

X-ray quality crystals were selected in Fomblin<sup>®</sup> Y H-VAC 140/13 perfluoropolyether at ambient temperature. The data was collected at 296(2) K on a *Bruker D8 Quest Eco* diffractometer using graphite monochromated Mo K<sub>α</sub> radiation ( $\lambda = 0.71073 \text{ \AA}$ ). The data was processed using APEX3,<sup>14</sup> the structures were solved by intrinsic phasing (SHELXT, Version 2014/5),<sup>15</sup> and refined by full matrix least squares procedures on  $F^2$  (SHELXL, Version 2014/7)<sup>16</sup> using the graphical interface Shelxle<sup>17</sup> within the SHELXTL suite of programs by Bruker. All non-hydrogen atoms were refined anisotropically. All hydrogen atoms were calculated geometrically, and a riding model was applied in the refinement process.

Due to the absence of heavy atoms, compound **5f** is a weak anomalous scatterer, rendering the Flack parameter meaningless. Detailed crystallographic and refinement data can be found in Table S1.

1870182 contains the supplementary crystallographic data for **5f**. These data can be obtained free of charge from The Cambridge Crystallographic Data Centre at [www.ccdc.cam.ac.uk](http://www.ccdc.cam.ac.uk).

<sup>14</sup> Bruker (2016), *APEX3 v2016.9-0, SAINT V8.37A, SHELXTL-2014*, Bruker AXS Inc.: Madison (WI), USA, **2016**.

<sup>15</sup> a) G. M. Sheldrick, *SHELXT-2014: Program for the Solution of Crystal Structures*, University of Göttingen, Germany, **2014**. b) G. M. Sheldrick, *Acta Crystallogr., Sect. A: Found. Crystallogr.* **2008**, *64*, 112–122. c) G. M. Sheldrick, *Acta Crystallogr., Sect. A: Found. Adv.* **2015**, *71*, 3–8.

<sup>16</sup> a) G. M. Sheldrick, *SHELXL-2014: Program for the Refinement of Crystal Structures*, University of Göttingen, Germany, **2014**. b) G. M. Sheldrick, *Acta Crystallogr., Sect. C: Struct. Chem.* **2015**, *71*, 3–8.

<sup>17</sup> C. B. Hübschle, G. M. Sheldrick, B. Dittrich, *Shelxle: a Qt graphical user interface for SHELXL*, *J. Appl. Crystallogr.* **2011**, *44*, 1281–1284.

Table S1: Crystal data, data collection and structure refinement details for compounds **5f**.

|                                                                                                   |                                                 |
|---------------------------------------------------------------------------------------------------|-------------------------------------------------|
| Compound                                                                                          | <b>5f</b>                                       |
| Empirical formula                                                                                 | C <sub>33</sub> H <sub>35</sub> NO <sub>6</sub> |
| Formula weight [g/mol]                                                                            | 541.62                                          |
| Color                                                                                             | colorless                                       |
| Crystal size [mm]                                                                                 | 0.70 × 0.53 × 0.07                              |
| Crystal system                                                                                    | monoclinic                                      |
| Space group                                                                                       | Cc                                              |
| <i>a</i> [Å]                                                                                      | 9.900(3)                                        |
| <i>b</i> [Å]                                                                                      | 34.441(10)                                      |
| <i>c</i> [Å]                                                                                      | 9.602(3)                                        |
| $\alpha$ [°]                                                                                      | 90                                              |
| $\beta$ [°]                                                                                       | 116.727(10)                                     |
| $\gamma$ [°]                                                                                      | 90                                              |
| <i>V</i> [Å <sup>3</sup> ]                                                                        | 2924.2(15)                                      |
| <i>Z</i>                                                                                          | 4                                               |
| <i>D</i> <sub>calc</sub> [g/cm <sup>3</sup> ]                                                     | 1.230                                           |
| $\mu$ [mm <sup>-1</sup> ]                                                                         | 0.08                                            |
| <i>T</i> [K]                                                                                      | 296                                             |
| $\theta$ range [°]                                                                                | 2.5-23.3                                        |
| No. of reflections measured                                                                       | 30621                                           |
| No. of independent reflections                                                                    | 4190                                            |
| Obs. Reflections with <i>I</i> > 2 $\sigma$ ( <i>I</i> )                                          | 2414                                            |
| No. of Parameters refined/restraints                                                              | 365/2                                           |
| Absorption correction                                                                             | Multi-scan                                      |
| <i>T</i> <sub>min</sub> , <i>T</i> <sub>max</sub>                                                 | 0.77, 0.99                                      |
| $\Delta\rho_{\min}/\Delta\rho_{\max}$ [e Å <sup>-3</sup> ]                                        | -0.24/0.20                                      |
| F(000)                                                                                            | 1152                                            |
| <i>R</i> <sub>int</sub>                                                                           | 0.172                                           |
| <i>R</i> <sub>1</sub> ( <i>R</i> [ <i>F</i> <sup>2</sup> ≥ 2 $\sigma$ ( <i>F</i> <sup>2</sup> )]) | 0.086                                           |
| <i>wR</i> <sub>2</sub> ( <i>wR</i> ( <i>F</i> <sup>2</sup> ))                                     | 0.174                                           |
| Goof                                                                                              | 1.12                                            |
| CCDC no.                                                                                          | 1870182                                         |
